# Supplementary material for: Extensive survey of the ycf4 plastid gene throughout the IRLC legumes: Robust evidence of its locus and lineage specific accelerated rate of evolution, pseudogenization and gene loss in the tribe Fabeae
Source: PubMed Central journal article supplement (PMC7058334; doi:10.1371/journal.pone.0229846), 2020-03-05
Supplement: pone.0229846.s002.pdf [file pone.0229846.s002.pdf]

1

|                            |       |       |       |       |       |
|----------------------------|-------|-------|-------|-------|-------|
| Trifolium strictum         | ----- | ----- | ----- | ----- | ----- |
| T. glanduliferum           | ----- | ----- | ----- | ----- | ----- |
| T. boissieri               | ----- | ----- | ----- | ----- | ----- |
| T. aureum                  | ----- | ----- | ----- | ----- | ----- |
| T.meduseum                 | ----- | ----- | ----- | ----- | ----- |
| T.subterraneum             | ----- | ----- | ----- | ----- | ----- |
| T.pratense                 | ----- | ----- | ----- | ----- | ----- |
| T.hybridum                 | ----- | ----- | ----- | ----- | ----- |
| T.semipilosum              | ----- | ----- | ----- | ----- | ----- |
| T.occidentale              | ----- | ----- | ----- | ----- | ----- |
| T.repens                   | ----- | ----- | ----- | ----- | ----- |
| T.lupinaster               | ----- | ----- | ----- | ----- | ----- |
| Cicer oxyodon              | ----- | ----- | ----- | ----- | ----- |
| C. chorrassanicum          | ----- | ----- | ----- | ----- | ----- |
| C. arietinum               | ----- | ----- | ----- | ----- | ----- |
| Medicago truncatula_KF     | ----- | ----- | ----- | ----- | ----- |
| M.truncatula_AC            | ----- | ----- | ----- | ----- | ----- |
| M.sativa_K                 | ----- | ----- | ----- | ----- | ----- |
| M.sativa                   | ----- | ----- | ----- | ----- | ----- |
| M.papillosa                | ----- | ----- | ----- | ----- | ----- |
| M.hybrida                  | ----- | ----- | ----- | ----- | ----- |
| M.falcata                  | ----- | ----- | ----- | ----- | ----- |
| M.sativa_KU                | ----- | ----- | ----- | ----- | ----- |
| Melilotus albus            | ----- | ----- | ----- | ----- | ----- |
| Hedysarum formosum         | ----- | ----- | ----- | ----- | ----- |
| H.varium                   | ----- | ----- | ----- | ----- | ----- |
| H.singarense               | ----- | ----- | ----- | ----- | ----- |
| H.minjanense               | ----- | ----- | ----- | ----- | ----- |
| Tavniera glabra            | ----- | ----- | ----- | ----- | ----- |
| T.diffusa                  | ----- | ----- | ----- | ----- | ----- |
| Greuteria membranacea      | ----- | ----- | ----- | ----- | ----- |
| Corethroedendron scoparium | ----- | ----- | ----- | ----- | ----- |
| Eversmannia subspinosa     | ----- | ----- | ----- | ----- | ----- |
| Onobrychis bungei          | ----- | ----- | ----- | ----- | ----- |
| O.cornuta                  | ----- | ----- | ----- | ----- | ----- |
| O.michauxii                | ----- | ----- | ----- | ----- | ----- |
| O.subacaulis               | ----- | ----- | ----- | ----- | ----- |
| O.teheranica               | ----- | ----- | ----- | ----- | ----- |
| Alhagi maurorum            | ----- | ----- | ----- | ----- | ----- |
| Caragana microphylla       | ----- | ----- | ----- | ----- | ----- |
| C.korshinski               | ----- | ----- | ----- | ----- | ----- |
| C.kozlowii                 | ----- | ----- | ----- | ----- | ----- |
| C.rosea                    | ----- | ----- | ----- | ----- | ----- |
| Tibetia liangshanensis     | ----- | ----- | ----- | ----- | ----- |
| Gueldenstaedtia verna      | ----- | ----- | ----- | ----- | ----- |
| Halimodendron halodendron  | ----- | ----- | ----- | ----- | ----- |
| Smirnowia turkestanica     | ----- | ----- | ----- | ----- | ----- |
| Eremosparton flaccidum     | ----- | ----- | ----- | ----- | ----- |
| Colutea persica            | ----- | ----- | ----- | ----- | ----- |
| C. triphylla               | ----- | ----- | ----- | ----- | ----- |
| Sphaerophysa salsula       | ----- | ----- | ----- | ----- | ----- |
| Podlechiella vogelii       | ----- | ----- | ----- | ----- | ----- |
| Carmichaelia australis     | ----- | ----- | ----- | ----- | ----- |
| Sutherlandia frutescens    | ----- | ----- | ----- | ----- | ----- |
| Astragalus membranaceus    | ----- | ----- | ----- | ----- | ----- |
| A.mongholicus              | ----- | ----- | ----- | ----- | ----- |
| A.nakaianus                | ----- | ----- | ----- | ----- | ----- |
| A.macropelmatus            | ----- | ----- | ----- | ----- | ----- |
| A.iranicus                 | ----- | ----- | ----- | ----- | ----- |
| A.denudatus                | ----- | ----- | ----- | ----- | ----- |
| A.odoratus                 | ----- | ----- | ----- | ----- | ----- |
| Oxytropis szovitsii        | ----- | ----- | ----- | ----- | ----- |
| O.iranica                  | ----- | ----- | ----- | ----- | ----- |
| O.kotschyana               | ----- | ----- | ----- | ----- | ----- |
| Erophaca baetica           | ----- | ----- | ----- | ----- | ----- |
| Wisteria floribunda        | ----- | ----- | ----- | ----- | ----- |
| W. sinensis                | ----- | ----- | ----- | ----- | ----- |
| Glycyrrhiza lepidota       | ----- | ----- | ----- | ----- | ----- |
| G.uralensis                | ----- | ----- | ----- | ----- | ----- |
| G.glabra                   | ----- | ----- | ----- | ----- | ----- |
| Meristotropis xathioides   | ----- | ----- | ----- | ----- | ----- |
| Robinia pseudoacacia       | ----- | ----- | ----- | ----- | ----- |
| Lotus japonicus            | ----- | ----- | ----- | ----- | ----- |
| Vicia alpestris            | ----- | ----- | ----- | ----- | ----- |
| V.sativa                   | ----- | ----- | ----- | ----- | ----- |

|                      |            |            |            |            |            |
|----------------------|------------|------------|------------|------------|------------|
| V.peregrina          | -----      | -----      | -----      | -----      | -----      |
| V.sepium             | -----      | -----      | -----      | -----      | -----      |
| V.faba               | -----      | -----      | -----      | -----      | -----      |
| V.canescens          | -----      | -----      | -----      | -----      | -----      |
| V.monantha           | -----      | -----      | -----      | -----      | -----      |
| V.tetrasperma        | -----      | -----      | -----      | -----      | -----      |
| V.narbonensis        | -----      | -----      | -----      | -----      | -----      |
| Lens culinaris       | -----      | -----      | -----      | -----      | -----      |
| L.orientalis         | -----      | -----      | -----      | -----      | -----      |
| V.ervilia            | -----      | -----      | -----      | -----      | -----      |
| Galega officinalis   | -----      | -----      | -----      | -----      | -----      |
| Lathyrus palustris_K | -----      | -----      | -----      | -----      | -----      |
| L.palustris_H        | -----      | -----      | -----      | -----      | -----      |
| L.davidii            | -----      | -----      | -----      | -----      | -----      |
| L.japonicus          | -----      | -----      | -----      | -----      | -----      |
| L.ochroleucus        | -----      | -----      | -----      | -----      | -----      |
| L.littoralis         | -----      | -----      | -----      | -----      | -----      |
| L.venosus            | -----      | -----      | -----      | -----      | -----      |
| L.graminifolius      | -----      | -----      | -----      | -----      | -----      |
| L.pubescens          | -----      | -----      | -----      | -----      | -----      |
| L.sativus_KJ         | -----      | -----      | -----      | -----      | -----      |
| L.sativus_HM         | -----      | -----      | -----      | -----      | -----      |
| L.pseudocicera       | -----      | -----      | -----      | -----      | -----      |
| L.chloranthus        | -----      | -----      | -----      | -----      | -----      |
| L.pratensis          | -----      | -----      | -----      | -----      | -----      |
| L.odoratus_HM        | -----      | -----      | -----      | -----      | -----      |
| L.odoratus_kJ        | -----      | -----      | -----      | -----      | -----      |
| L.hirsutus           | -----      | -----      | -----      | -----      | -----      |
| L.annuus             | -----      | -----      | -----      | -----      | -----      |
| L.cirrhosus          | ATGAACATAA | AGCAGTGGTT | TCACAGGATA | AAGCAAGGGT | GCCAAAGGAT |
| L.latifolius         | ATGGACATAA | AACAGTGGTT | CCACAGGATA | AAGCAAGGGT | TCCAAAGGAT |
| L.tingitanus         | -----      | -----      | -----      | -----      | -----      |
| Pisum sativum_H      | -----      | -----      | -----      | -----      | -----      |
| Pisum sativum_K      | -----      | -----      | -----      | -----      | -----      |
| Pisum sativum_HG     | -----      | -----      | -----      | -----      | -----      |
| Pisum fulvum         | -----      | -----      | -----      | -----      | -----      |
| Vavilovia formosa    | -----      | -----      | -----      | -----      | -----      |
| L.clymenum           | -----      | -----      | -----      | -----      | -----      |
| L.ochrus             | -----      | -----      | -----      | -----      | -----      |

|                            |       |       |       |       |       |
|----------------------------|-------|-------|-------|-------|-------|
| Trifolium strictum         | ----- | ----- | ----- | ----- | ----- |
| T. glanduliferum           | ----- | ----- | ----- | ----- | ----- |
| T. boissieri               | ----- | ----- | ----- | ----- | ----- |
| T. aureum                  | ----- | ----- | ----- | ----- | ----- |
| T. meduseum                | ----- | ----- | ----- | ----- | ----- |
| T. subterraneum            | ----- | ----- | ----- | ----- | ----- |
| T. pratense                | ----- | ----- | ----- | ----- | ----- |
| T. hybridum                | ----- | ----- | ----- | ----- | ----- |
| T. semipilosum             | ----- | ----- | ----- | ----- | ----- |
| T. occidentale             | ----- | ----- | ----- | ----- | ----- |
| T. repens                  | ----- | ----- | ----- | ----- | ----- |
| T. lupinaster              | ----- | ----- | ----- | ----- | ----- |
| Cicer oxyodon              | ----- | ----- | ----- | ----- | ----- |
| C. chorrassanicum          | ----- | ----- | ----- | ----- | ----- |
| C. arietinum               | ----- | ----- | ----- | ----- | ----- |
| Medicago truncatula_KF     | ----- | ----- | ----- | ----- | ----- |
| M. truncatula_AC           | ----- | ----- | ----- | ----- | ----- |
| M. sativa_K                | ----- | ----- | ----- | ----- | ----- |
| M. sativa                  | ----- | ----- | ----- | ----- | ----- |
| M. papillosa               | ----- | ----- | ----- | ----- | ----- |
| M. hybrida                 | ----- | ----- | ----- | ----- | ----- |
| M. falcata                 | ----- | ----- | ----- | ----- | ----- |
| M. sativa_KU               | ----- | ----- | ----- | ----- | ----- |
| Melilotus albus            | ----- | ----- | ----- | ----- | ----- |
| Hedysarum formosum         | ----- | ----- | ----- | ----- | ----- |
| H. varium                  | ----- | ----- | ----- | ----- | ----- |
| H. singarense              | ----- | ----- | ----- | ----- | ----- |
| H. minjanense              | ----- | ----- | ----- | ----- | ----- |
| Tavniera glabra            | ----- | ----- | ----- | ----- | ----- |
| T. diffusa                 | ----- | ----- | ----- | ----- | ----- |
| Greuteria membranacea      | ----- | ----- | ----- | ----- | ----- |
| Corethroedendron scoparium | ----- | ----- | ----- | ----- | ----- |
| Eversmannia subspinosa     | ----- | ----- | ----- | ----- | ----- |
| Onobrychis bungei          | ----- | ----- | ----- | ----- | ----- |
| O. cornuta                 | ----- | ----- | ----- | ----- | ----- |
| O. michauxii               | ----- | ----- | ----- | ----- | ----- |
| O. subacaulis              | ----- | ----- | ----- | ----- | ----- |
| O. teheranica              | ----- | ----- | ----- | ----- | ----- |
| Alhagi maurorum            | ----- | ----- | ----- | ----- | ----- |
| Caragana microphylla       | ----- | ----- | ----- | ----- | ----- |
| C. korshinski              | ----- | ----- | ----- | ----- | ----- |
| C. kozlowii                | ----- | ----- | ----- | ----- | ----- |
| C. rosea                   | ----- | ----- | ----- | ----- | ----- |
| Tibetia liangshanensis     | ----- | ----- | ----- | ----- | ----- |
| Gueldenstaedtia verna      | ----- | ----- | ----- | ----- | ----- |
| Halimodendron halodendron  | ----- | ----- | ----- | ----- | ----- |
| Smirnowia turkestanica     | ----- | ----- | ----- | ----- | ----- |
| Eremosparton flaccidum     | ----- | ----- | ----- | ----- | ----- |
| Colutea persica            | ----- | ----- | ----- | ----- | ----- |
| C. triphylla               | ----- | ----- | ----- | ----- | ----- |
| Sphaerophysa salsula       | ----- | ----- | ----- | ----- | ----- |
| Podlechiella vogelii       | ----- | ----- | ----- | ----- | ----- |
| Carmichaelia australis     | ----- | ----- | ----- | ----- | ----- |
| Sutherlandia frutescens    | ----- | ----- | ----- | ----- | ----- |
| Astragalus membranaceus    | ----- | ----- | ----- | ----- | ----- |
| A. mongholicus             | ----- | ----- | ----- | ----- | ----- |
| A. nakaianus               | ----- | ----- | ----- | ----- | ----- |
| A. macropelmatus           | ----- | ----- | ----- | ----- | ----- |
| A. iranicus                | ----- | ----- | ----- | ----- | ----- |
| A. denudatus               | ----- | ----- | ----- | ----- | ----- |
| A. odoratus                | ----- | ----- | ----- | ----- | ----- |
| Oxytropis szovitsii        | ----- | ----- | ----- | ----- | ----- |
| O. iranica                 | ----- | ----- | ----- | ----- | ----- |
| O. kotschyana              | ----- | ----- | ----- | ----- | ----- |
| Erophaca baetica           | ----- | ----- | ----- | ----- | ----- |
| Wisteria floribunda        | ----- | ----- | ----- | ----- | ----- |
| W. sinensis                | ----- | ----- | ----- | ----- | ----- |
| Glycyrrhiza lepidota       | ----- | ----- | ----- | ----- | ----- |
| G. uralensis               | ----- | ----- | ----- | ----- | ----- |
| G. glabra                  | ----- | ----- | ----- | ----- | ----- |
| Meristotropis xathioides   | ----- | ----- | ----- | ----- | ----- |
| Robinia pseudoacacia       | ----- | ----- | ----- | ----- | ----- |
| Lotus japonicus            | ----- | ----- | ----- | ----- | ----- |
| Vicia alpestris            | ----- | ----- | ----- | ----- | ----- |
| V. sativa                  | ----- | ----- | ----- | ----- | ----- |
| V. peregrina               | ----- | ----- | ----- | ----- | ----- |
| V. sepium                  | ----- | ----- | ----- | ----- | ----- |
| V. faba                    | ----- | ----- | ----- | ----- | ----- |

|                      |            |            |            |            |            |
|----------------------|------------|------------|------------|------------|------------|
| V.canescens          | -----      | -----      | -----      | -----      | -----      |
| V.monantha           | -----      | -----      | -----      | -----      | -----      |
| V.tetrasperma        | -----      | -----      | -----      | -----      | -----      |
| V.narbonensis        | -----      | -----      | -----      | -----      | -----      |
| Lens culinaris       | -----      | -----      | -----      | -----      | -----      |
| L.orientalis         | -----      | -----      | -----      | -----      | -----      |
| V.ervilia            | -----      | -----      | -----      | -----      | -----      |
| Galega officinalis   | -----      | -----      | -----      | -----      | -----      |
| Lathyrus palustris_K | -----      | -----      | -----      | -----      | -----      |
| L.palustris_H        | -----      | -----      | -----      | -----      | -----      |
| L.davidii            | -----      | -----      | -----      | -----      | -----      |
| L.japonicus          | -----      | -----      | -----      | -----      | -----      |
| L.ochroleucus        | -----      | -----      | -----      | -----      | -----      |
| L.littoralis         | -----      | -----      | -----      | -----      | -----      |
| L.venosus            | -----      | -----      | -----      | -----      | -----      |
| L.graminifolius      | -----      | -----      | -----      | -----      | -----      |
| L.pubescens          | -----      | -----      | -----      | -----      | -----      |
| L.sativus_KJ         | -----      | -----AT    | GGATCTAAAA | GACTTGAAAA | GATTTTTGAA |
| L.sativus_HM         | -----      | -----AT    | GGATCTAAAA | GACTTGAAAA | GATTTTTGAA |
| L.pseudocicera       | -----      | -----      | -----      | -----      | -----      |
| L.chloranthus        | -----      | -----      | -----      | -----      | -----      |
| L.pratensis          | -----      | -----      | -----      | -----      | -----      |
| L.odoratus_HM        | -----      | -----      | -----      | -----      | -----      |
| L.odoratus_kJ        | -----      | -----      | -----      | -----      | -----      |
| L.hirsutus           | -----      | -----      | -----      | -----      | -----      |
| L.annuus             | -----      | -----      | -----      | -----      | -----      |
| L.cirrhosus          | TTGGCAGAAT | ATCAGATCCT | TCTTCTCAA  | AACTGAAACA | AAAAACGGAG |
| L.latifolius         | TTGGCAGAAT | ATCAGATCCT | TCTTCTCAA  | AACTGAAAAA | ACAAATGGAG |
| L.tingitanus         | -----      | -----      | -----      | -----      | -----      |
| Pisum sativum_H      | -----      | -----      | -----      | -----      | -----      |
| Pisum sativum_K      | -----      | -----      | -----      | -----      | -----      |
| Pisum sativum_HG     | -----      | -----      | -----      | -----      | -----      |
| Pisum fulvum         | -----      | -----      | -----      | -----      | -----      |
| Vavilovia formosa    | -----      | -----      | -----      | -----      | -----      |
| L.clymenum           | -----      | -----      | -----      | -----      | -----      |
| L.ochrus             | -----      | -----      | -----      | -----      | -----      |

|                            |       |       |       |       |       |
|----------------------------|-------|-------|-------|-------|-------|
| Trifolium strictum         | ----- | ----- | ----- | ----- | ----- |
| T. glanduliferum           | ----- | ----- | ----- | ----- | ----- |
| T. boissieri               | ----- | ----- | ----- | ----- | ----- |
| T. aureum                  | ----- | ----- | ----- | ----- | ----- |
| T. meduseum                | ----- | ----- | ----- | ----- | ----- |
| T. subterraneum            | ----- | ----- | ----- | ----- | ----- |
| T. pratense                | ----- | ----- | ----- | ----- | ----- |
| T. hybridum                | ----- | ----- | ----- | ----- | ----- |
| T. semipilosum             | ----- | ----- | ----- | ----- | ----- |
| T. occidentale             | ----- | ----- | ----- | ----- | ----- |
| T. repens                  | ----- | ----- | ----- | ----- | ----- |
| T. lupinaster              | ----- | ----- | ----- | ----- | ----- |
| Cicer oxyodon              | ----- | ----- | ----- | ----- | ----- |
| C. chorrassanicum          | ----- | ----- | ----- | ----- | ----- |
| C. arietinum               | ----- | ----- | ----- | ----- | ----- |
| Medicago truncatula_KF     | ----- | ----- | ----- | ----- | ----- |
| M. truncatula_AC           | ----- | ----- | ----- | ----- | ----- |
| M. sativa_K                | ----- | ----- | ----- | ----- | ----- |
| M. sativa                  | ----- | ----- | ----- | ----- | ----- |
| M. papillosa               | ----- | ----- | ----- | ----- | ----- |
| M. hybrida                 | ----- | ----- | ----- | ----- | ----- |
| M. falcata                 | ----- | ----- | ----- | ----- | ----- |
| M. sativa_KU               | ----- | ----- | ----- | ----- | ----- |
| Melilotus albus            | ----- | ----- | ----- | ----- | ----- |
| Hedysarum formosum         | ----- | ----- | ----- | ----- | ----- |
| H. varium                  | ----- | ----- | ----- | ----- | ----- |
| H. singarense              | ----- | ----- | ----- | ----- | ----- |
| H. minjanense              | ----- | ----- | ----- | ----- | ----- |
| Tavniera glabra            | ----- | ----- | ----- | ----- | ----- |
| T. diffusa                 | ----- | ----- | ----- | ----- | ----- |
| Greuteria membranacea      | ----- | ----- | ----- | ----- | ----- |
| Corethroedendron scoparium | ----- | ----- | ----- | ----- | ----- |
| Eversmannia subspinosa     | ----- | ----- | ----- | ----- | ----- |
| Onobrychis bungei          | ----- | ----- | ----- | ----- | ----- |
| O. cornuta                 | ----- | ----- | ----- | ----- | ----- |
| O. michauxii               | ----- | ----- | ----- | ----- | ----- |
| O. subacaulis              | ----- | ----- | ----- | ----- | ----- |
| O. teheranica              | ----- | ----- | ----- | ----- | ----- |
| Alhagi maurorum            | ----- | ----- | ----- | ----- | ----- |
| Caragana microphylla       | ----- | ----- | ----- | ----- | ----- |
| C. korshinski              | ----- | ----- | ----- | ----- | ----- |
| C. kozlowii                | ----- | ----- | ----- | ----- | ----- |
| C. rosea                   | ----- | ----- | ----- | ----- | ----- |
| Tibetia liangshanensis     | ----- | ----- | ----- | ----- | ----- |
| Gueldenstaedtia verna      | ----- | ----- | ----- | ----- | ----- |
| Halimodendron halodendron  | ----- | ----- | ----- | ----- | ----- |
| Smirnowia turkestanica     | ----- | ----- | ----- | ----- | ----- |
| Eremosparton flaccidum     | ----- | ----- | ----- | ----- | ----- |
| Colutea persica            | ----- | ----- | ----- | ----- | ----- |
| C. triphylla               | ----- | ----- | ----- | ----- | ----- |
| Sphaerophysa salsula       | ----- | ----- | ----- | ----- | ----- |
| Podlechiella vogelii       | ----- | ----- | ----- | ----- | ----- |
| Carmichaelia australis     | ----- | ----- | ----- | ----- | ----- |
| Sutherlandia frutescens    | ----- | ----- | ----- | ----- | ----- |
| Astragalus membranaceus    | ----- | ----- | ----- | ----- | ----- |
| A. mongholicus             | ----- | ----- | ----- | ----- | ----- |
| A. nakaianus               | ----- | ----- | ----- | ----- | ----- |
| A. macropelmatus           | ----- | ----- | ----- | ----- | ----- |
| A. iranicus                | ----- | ----- | ----- | ----- | ----- |
| A. denudatus               | ----- | ----- | ----- | ----- | ----- |
| A. odoratus                | ----- | ----- | ----- | ----- | ----- |
| Oxytropis szovitsii        | ----- | ----- | ----- | ----- | ----- |
| O. iranica                 | ----- | ----- | ----- | ----- | ----- |
| O. kotschyana              | ----- | ----- | ----- | ----- | ----- |
| Erophaca baetica           | ----- | ----- | ----- | ----- | ----- |
| Wisteria floribunda        | ----- | ----- | ----- | ----- | ----- |
| W. sinensis                | ----- | ----- | ----- | ----- | ----- |
| Glycyrrhiza lepidota       | ----- | ----- | ----- | ----- | ----- |
| G. uralensis               | ----- | ----- | ----- | ----- | ----- |
| G. glabra                  | ----- | ----- | ----- | ----- | ----- |
| Meristotropis xathioides   | ----- | ----- | ----- | ----- | ----- |
| Robinia pseudoacacia       | ----- | ----- | ----- | ----- | ----- |
| Lotus japonicus            | ----- | ----- | ----- | ----- | ----- |
| Vicia alpestris            | ----- | ----- | ----- | ----- | ----- |
| V. sativa                  | ----- | ----- | ----- | ----- | ----- |
| V. peregrina               | ----- | ----- | ----- | ----- | ----- |
| V. sepium                  | ----- | ----- | ----- | ----- | ----- |
| V. faba                    | ----- | ----- | ----- | ----- | ----- |

|                      |            |            |            |            |             |
|----------------------|------------|------------|------------|------------|-------------|
| V.canescens          | -----      | -----      | -----      | -----      | -----       |
| V.monantha           | -----      | -----      | -----      | -----      | -----       |
| V.tetrasperma        | -----      | -----      | -----      | -----      | -----       |
| V.narbonensis        | -----      | -----      | -----      | -----      | -----       |
| Lens culinaris       | -----      | -----      | -----      | -----      | -----       |
| L.orientalis         | -----      | -----      | -----      | -----      | -----       |
| V.ervilia            | -----      | -----      | -----      | -----      | -----       |
| Galega officinalis   | -----      | -----      | -----      | -----      | -----       |
| Lathyrus palustris_K | -----      | -----      | -----      | -----      | -----       |
| L.palustris_H        | -----      | -----      | -----      | -----      | -----       |
| L.davidii            | -----      | -----      | -----      | -----      | -----       |
| L.japonicus          | -----      | -----      | -----      | -----      | -----       |
| L.ochroleucus        | -----      | -----      | -----      | -----      | -----       |
| L.littoralis         | -----      | -----      | -----      | -----      | -----       |
| L.venosus            | -----      | -----      | -----      | -----      | -----       |
| L.graminifolius      | -----      | -----      | -----      | -----      | -----       |
| L.pubescens          | -----      | -----      | -----      | -----      | -----       |
| L.sativus_KJ         | AAACCTGTGG | ATCTGGAAAA | AAAGACACTG | TAAAAGATTT | TTGAAAAACC  |
| L.sativus_HM         | AAACCTGTGG | ATCTGGAAAA | AAAGACACTG | TAAAAGATTT | TTGAAAAACC  |
| L.pseudocicera       | -----      | -----      | -----      | -----      | -----       |
| L.chloranthus        | -----      | -----      | -----      | -----      | -----       |
| L.pratensis          | -----      | -----      | -----      | -----      | -----       |
| L.odoratus_HM        | -----      | -----      | -----      | -----      | -----       |
| L.odoratus_kJ        | -----      | -----      | -----      | -----      | -----       |
| L.hirsutus           | -----      | -----      | -----      | -----      | -----       |
| L.annuus             | -----      | -----      | -----      | -----      | -----       |
| L.cirrhosus          | GGCATGTTAT | TTCTTTTATG | AACAAAGAGT | TCAAAAAGAT | C'TTGAAAAG  |
| L.latifolius         | GACATGTTAT | TTCTTTTATG | AACAAAGAGT | TCAAAAAGAT | C'TTTTCCAAG |
| L.tingitanus         | -----      | -----      | -----      | -----      | -----       |
| Pisum sativum_H      | -----      | -----      | -----      | -----      | -----       |
| Pisum sativum_K      | -----      | -----      | -----      | -----      | -----       |
| Pisum sativum_HG     | -----      | -----      | -----      | -----      | -----       |
| Pisum fulvum         | -----      | -----      | -----      | -----      | -----       |
| Vavilovia formosa    | -----      | -----      | -----      | -----      | -----       |
| L.clymenum           | -----      | -----      | -----      | -----      | -----       |
| L.ochrus             | -----      | -----      | -----      | -----      | -----       |

|                            |       |       |       |       |       |
|----------------------------|-------|-------|-------|-------|-------|
| Trifolium strictum         | ----- | ----- | ----- | ----- | ----- |
| T. glanduliferum           | ----- | ----- | ----- | ----- | ----- |
| T. boissieri               | ----- | ----- | ----- | ----- | ----- |
| T. aureum                  | ----- | ----- | ----- | ----- | ----- |
| T. meduseum                | ----- | ----- | ----- | ----- | ----- |
| T. subterraneum            | ----- | ----- | ----- | ----- | ----- |
| T. pratense                | ----- | ----- | ----- | ----- | ----- |
| T. hybridum                | ----- | ----- | ----- | ----- | ----- |
| T. semipilosum             | ----- | ----- | ----- | ----- | ----- |
| T. occidentale             | ----- | ----- | ----- | ----- | ----- |
| T. repens                  | ----- | ----- | ----- | ----- | ----- |
| T. lupinaster              | ----- | ----- | ----- | ----- | ----- |
| Cicer oxyodon              | ----- | ----- | ----- | ----- | ----- |
| C. chorrassanicum          | ----- | ----- | ----- | ----- | ----- |
| C. arietinum               | ----- | ----- | ----- | ----- | ----- |
| Medicago truncatula_KF     | ----- | ----- | ----- | ----- | ----- |
| M. truncatula_AC           | ----- | ----- | ----- | ----- | ----- |
| M. sativa_K                | ----- | ----- | ----- | ----- | ----- |
| M. sativa                  | ----- | ----- | ----- | ----- | ----- |
| M. papillosa               | ----- | ----- | ----- | ----- | ----- |
| M. hybrida                 | ----- | ----- | ----- | ----- | ----- |
| M. falcata                 | ----- | ----- | ----- | ----- | ----- |
| M. sativa_KU               | ----- | ----- | ----- | ----- | ----- |
| Melilotus albus            | ----- | ----- | ----- | ----- | ----- |
| Hedysarum formosum         | ----- | ----- | ----- | ----- | ----- |
| H. varium                  | ----- | ----- | ----- | ----- | ----- |
| H. singarense              | ----- | ----- | ----- | ----- | ----- |
| H. minjanense              | ----- | ----- | ----- | ----- | ----- |
| Tavniera glabra            | ----- | ----- | ----- | ----- | ----- |
| T. diffusa                 | ----- | ----- | ----- | ----- | ----- |
| Greuteria membranacea      | ----- | ----- | ----- | ----- | ----- |
| Corethroedendron scoparium | ----- | ----- | ----- | ----- | ----- |
| Eversmannia subspinosa     | ----- | ----- | ----- | ----- | ----- |
| Onobrychis bungei          | ----- | ----- | ----- | ----- | ----- |
| O. cornuta                 | ----- | ----- | ----- | ----- | ----- |
| O. michauxii               | ----- | ----- | ----- | ----- | ----- |
| O. subacaulis              | ----- | ----- | ----- | ----- | ----- |
| O. teheranica              | ----- | ----- | ----- | ----- | ----- |
| Alhagi maurorum            | ----- | ----- | ----- | ----- | ----- |
| Caragana microphylla       | ----- | ----- | ----- | ----- | ----- |
| C. korshinski              | ----- | ----- | ----- | ----- | ----- |
| C. kozlowii                | ----- | ----- | ----- | ----- | ----- |
| C. rosea                   | ----- | ----- | ----- | ----- | ----- |
| Tibetia liangshanensis     | ----- | ----- | ----- | ----- | ----- |
| Gueldenstaedtia verna      | ----- | ----- | ----- | ----- | ----- |
| Halimodendron halodendron  | ----- | ----- | ----- | ----- | ----- |
| Smirnowia turkestanica     | ----- | ----- | ----- | ----- | ----- |
| Eremosparton flaccidum     | ----- | ----- | ----- | ----- | ----- |
| Colutea persica            | ----- | ----- | ----- | ----- | ----- |
| C. triphylla               | ----- | ----- | ----- | ----- | ----- |
| Sphaerophysa salsula       | ----- | ----- | ----- | ----- | ----- |
| Podlechiella vogelii       | ----- | ----- | ----- | ----- | ----- |
| Carmichaelia australis     | ----- | ----- | ----- | ----- | ----- |
| Sutherlandia frutescens    | ----- | ----- | ----- | ----- | ----- |
| Astragalus membranaceus    | ----- | ----- | ----- | ----- | ----- |
| A. mongholicus             | ----- | ----- | ----- | ----- | ----- |
| A. nakaianus               | ----- | ----- | ----- | ----- | ----- |
| A. macropelmatus           | ----- | ----- | ----- | ----- | ----- |
| A. iranicus                | ----- | ----- | ----- | ----- | ----- |
| A. denudatus               | ----- | ----- | ----- | ----- | ----- |
| A. odoratus                | ----- | ----- | ----- | ----- | ----- |
| Oxytropis szovitsii        | ----- | ----- | ----- | ----- | ----- |
| O. iranica                 | ----- | ----- | ----- | ----- | ----- |
| O. kotschyana              | ----- | ----- | ----- | ----- | ----- |
| Erophaca baetica           | ----- | ----- | ----- | ----- | ----- |
| Wisteria floribunda        | ----- | ----- | ----- | ----- | ----- |
| W. sinensis                | ----- | ----- | ----- | ----- | ----- |
| Glycyrrhiza lepidota       | ----- | ----- | ----- | ----- | ----- |
| G. uralensis               | ----- | ----- | ----- | ----- | ----- |
| G. glabra                  | ----- | ----- | ----- | ----- | ----- |
| Meristotropis xathioides   | ----- | ----- | ----- | ----- | ----- |
| Robinia pseudoacacia       | ----- | ----- | ----- | ----- | ----- |
| Lotus japonicus            | ----- | ----- | ----- | ----- | ----- |
| Vicia alpestris            | ----- | ----- | ----- | ----- | ----- |
| V. sativa                  | ----- | ----- | ----- | ----- | ----- |
| V. peregrina               | ----- | ----- | ----- | ----- | ----- |
| V. sepium                  | ----- | ----- | ----- | ----- | ----- |
| V. faba                    | ----- | ----- | ----- | ----- | ----- |

|                      |            |             |            |            |            |
|----------------------|------------|-------------|------------|------------|------------|
| V.canescens          | -----      | -----       | -----      | -----      | -----      |
| V.monantha           | -----      | -----       | -----      | -----      | -----      |
| V.tetrasperma        | -----      | -----       | -----      | -----      | -----      |
| V.narbonensis        | -----      | -----       | -----      | -----      | -----      |
| Lens culinaris       | -----      | -----       | -----      | -----      | -----      |
| L.orientalis         | -----      | -----       | -----      | -----      | -----      |
| V.ervilia            | -----      | -----       | -----      | -----      | -----      |
| Galega officinalis   | -----      | -----       | -----      | -----      | -----      |
| Lathyrus palustris_K | -----ATG   | AATAAAAAA-  | -----AA    | AATTGTTCTA | GTTATCGCCC |
| L.palustris_H        | -----ATG   | AATAAAAAA-  | -----AA    | AATACTTCTA | GTTATCATTC |
| L.davidii            | -----ATG   | AAAAAAAAAAT | TTAGTCTAAA | AATTCCTAGA | GTTTTGACTC |
| L.japonicus          | -----ATG   | AAAAAAAAA-  | -----AA    | AAATTTTCTA | GTTATCACAC |
| L.ochroleucus        | -----ATG   | ACTACTAAA-  | -----AAGAA | AATTTTTCTC | GTTATTGCGC |
| L.littoralis         | -----      | ---ATGAAA-  | -----AA    | AATATTTCTA | GTTATTACAC |
| L.venosus            | -----ATG   | GAAAAAAAAA- | -----AA    | AATTTTGCTC | GTTATCACCC |
| L.graminifolius      | -----      | ATGAAAAAA-  | -----CA    | AGTTGCGCTA | GTTATGGTGC |
| L.pubescens          | -----ATG   | AATAAAAAAGT | ---ACAAAAA | AGTGGTTTTG | ATTATAGTTA |
| L.sativus_KJ         | TGTGGATCTG | GAAAAAAGA   | CACTGTATTA | TTATTACAGT | GACACATATT |
| L.sativus_HM         | TGTGGATCTG | GAAAAAAGA   | CACTGTATTA | TTATTACAGT | GACACATATT |
| L.pseudocicera       | -----      | -----       | -----      | -----      | -----      |
| L.chloranthus        | -----      | -----       | -----      | -----      | -----      |
| L.pratensis          | -----      | -----       | -----      | -----      | -----      |
| L.odoratus_HM        | -----      | -----       | -----      | -----      | -----      |
| L.odoratus_kJ        | -----      | -----       | -----      | -----      | -----      |
| L.hirsutus           | -----      | -----       | -----      | -----      | -----      |
| L.annuus             | -----      | -----       | -----      | -----      | -----      |
| L.cirrhosus          | ATCTTTTCA  | AGATAAAGAT  | CGTTTTCTTG | ATCTTGAAAA | AAAGGAAAAT |
| L.latifolius         | ATCTTTTCA  | AGATAAAGAT  | CGTTTCCAAG | ATTTTGAAAA | AAAGGAAAAT |
| L.tingitanus         | -----      | -----       | -----      | -----      | -----      |
| Pisum sativum_H      | -----      | -----       | -----      | -----      | -----      |
| Pisum sativum_K      | -----      | -----       | -----      | -----      | -----      |
| Pisum sativum_HG     | -----      | -----       | -----      | -----      | -----      |
| Pisum fulvum         | -----      | -----       | -----      | -----      | -----      |
| Vavilovia formosa    | -----      | -----       | -----      | -----      | -----      |
| L.clymenum           | -----      | -----       | -----      | -----      | -----      |
| L.ochrus             | -----      | -----       | -----      | -----      | -----      |



|                            |       |       |       |       |       |
|----------------------------|-------|-------|-------|-------|-------|
| Trifolium strictum         | ----- | ----- | ----- | ----- | ----- |
| T. glanduliferum           | ----- | ----- | ----- | ----- | ----- |
| T. boissieri               | ----- | ----- | ----- | ----- | ----- |
| T. aureum                  | ----- | ----- | ----- | ----- | ----- |
| T. meduseum                | ----- | ----- | ----- | ----- | ----- |
| T. subterraneum            | ----- | ----- | ----- | ----- | ----- |
| T. pratense                | ----- | ----- | ----- | ----- | ----- |
| T. hybridum                | ----- | ----- | ----- | ----- | ----- |
| T. semipilosum             | ----- | ----- | ----- | ----- | ----- |
| T. occidentale             | ----- | ----- | ----- | ----- | ----- |
| T. repens                  | ----- | ----- | ----- | ----- | ----- |
| T. lupinaster              | ----- | ----- | ----- | ----- | ----- |
| Cicer oxyodon              | ----- | ----- | ----- | ----- | ----- |
| C. chorrassanicum          | ----- | ----- | ----- | ----- | ----- |
| C. arietinum               | ----- | ----- | ----- | ----- | ----- |
| Medicago truncatula_KF     | ----- | ----- | ----- | ----- | ----- |
| M. truncatula_AC           | ----- | ----- | ----- | ----- | ----- |
| M. sativa_K                | ----- | ----- | ----- | ----- | ----- |
| M. sativa                  | ----- | ----- | ----- | ----- | ----- |
| M. papillosa               | ----- | ----- | ----- | ----- | ----- |
| M. hybrida                 | ----- | ----- | ----- | ----- | ----- |
| M. falcata                 | ----- | ----- | ----- | ----- | ----- |
| M. sativa_KU               | ----- | ----- | ----- | ----- | ----- |
| Melilotus albus            | ----- | ----- | ----- | ----- | ----- |
| Hedysarum formosum         | ----- | ----- | ----- | ----- | ----- |
| H. varium                  | ----- | ----- | ----- | ----- | ----- |
| H. singarense              | ----- | ----- | ----- | ----- | ----- |
| H. minjanense              | ----- | ----- | ----- | ----- | ----- |
| Tavniera glabra            | ----- | ----- | ----- | ----- | ----- |
| T. diffusa                 | ----- | ----- | ----- | ----- | ----- |
| Greuteria membranacea      | ----- | ----- | ----- | ----- | ----- |
| Corethroedendron scoparium | ----- | ----- | ----- | ----- | ----- |
| Eversmannia subspinosa     | ----- | ----- | ----- | ----- | ----- |
| Onobrychis bungei          | ----- | ----- | ----- | ----- | ----- |
| O. cornuta                 | ----- | ----- | ----- | ----- | ----- |
| O. michauxii               | ----- | ----- | ----- | ----- | ----- |
| O. subacaulis              | ----- | ----- | ----- | ----- | ----- |
| O. teheranica              | ----- | ----- | ----- | ----- | ----- |
| Alhagi maurorum            | ----- | ----- | ----- | ----- | ----- |
| Caragana microphylla       | ----- | ----- | ----- | ----- | ----- |
| C. korshinski              | ----- | ----- | ----- | ----- | ----- |
| C. kozlowii                | ----- | ----- | ----- | ----- | ----- |
| C. rosea                   | ----- | ----- | ----- | ----- | ----- |
| Tibetia liangshanensis     | ----- | ----- | ----- | ----- | ----- |
| Gueldenstaedtia verna      | ----- | ----- | ----- | ----- | ----- |
| Halimodendron halodendron  | ----- | ----- | ----- | ----- | ----- |
| Smirnowia turkestanica     | ----- | ----- | ----- | ----- | ----- |
| Eremosparton flaccidum     | ----- | ----- | ----- | ----- | ----- |
| Colutea persica            | ----- | ----- | ----- | ----- | ----- |
| C. triphylla               | ----- | ----- | ----- | ----- | ----- |
| Sphaerophysa salsula       | ----- | ----- | ----- | ----- | ----- |
| Podlechiella vogelii       | ----- | ----- | ----- | ----- | ----- |
| Carmichaelia australis     | ----- | ----- | ----- | ----- | ----- |
| Sutherlandia frutescens    | ----- | ----- | ----- | ----- | ----- |
| Astragalus membranaceus    | ----- | ----- | ----- | ----- | ----- |
| A. mongholicus             | ----- | ----- | ----- | ----- | ----- |
| A. nakaianus               | ----- | ----- | ----- | ----- | ----- |
| A. macropelmatus           | ----- | ----- | ----- | ----- | ----- |
| A. iranicus                | ----- | ----- | ----- | ----- | ----- |
| A. denudatus               | ----- | ----- | ----- | ----- | ----- |
| A. odoratus                | ----- | ----- | ----- | ----- | ----- |
| Oxytropis szovitsii        | ----- | ----- | ----- | ----- | ----- |
| O. iranica                 | ----- | ----- | ----- | ----- | ----- |
| O. kotschyana              | ----- | ----- | ----- | ----- | ----- |
| Erophaca baetica           | ----- | ----- | ----- | ----- | ----- |
| Wisteria floribunda        | ----- | ----- | ----- | ----- | ----- |
| W. sinensis                | ----- | ----- | ----- | ----- | ----- |
| Glycyrrhiza lepidota       | ----- | ----- | ----- | ----- | ----- |
| G. uralensis               | ----- | ----- | ----- | ----- | ----- |
| G. glabra                  | ----- | ----- | ----- | ----- | ----- |
| Meristotropis xathioides   | ----- | ----- | ----- | ----- | ----- |
| Robinia pseudoacacia       | ----- | ----- | ----- | ----- | ----- |
| Lotus japonicus            | ----- | ----- | ----- | ----- | ----- |
| Vicia alpestris            | ----- | ----- | ----- | ----- | ----- |
| V. sativa                  | ----- | ----- | ----- | ----- | ----- |
| V. peregrina               | ----- | ----- | ----- | ----- | ----- |
| V. sepium                  | ----- | ----- | ----- | ----- | ----- |
| V. faba                    | ----- | ----- | ----- | ----- | ----- |

|                      |            |            |             |             |            |
|----------------------|------------|------------|-------------|-------------|------------|
| V.canescens          | -----      | -----      | -----       | -----       | -----      |
| V.monantha           | -----      | -----      | -----       | -----       | -----      |
| V.tetrasperma        | -----      | -----      | -----       | -----       | -----      |
| V.narbonensis        | -----      | -----      | -----       | -----       | -----      |
| Lens culinaris       | -----      | -----      | -----       | -----       | -----      |
| L.orientalis         | -----      | -----      | -----       | -----       | -----      |
| V.ervilia            | -----      | -----      | -----       | -----       | -----      |
| Galega officinalis   | -----      | -----      | -----       | -----       | -----      |
| Lathyrus palustris_K | ATGTTGCCTT | CACCATCTAT | ATCTGCCGGT  | ACACAGGAGA  | C----CTTTT |
| L.palustris_H        | ATGTGGCCTT | CAGCACCTAT | ATGGGCTGGT  | ACACAGGAGA  | T----CTTTT |
| L.davidii            | AGATTGCTTT | CAGCACGTAC | ATGACCCGGT  | ACGTTTTGGA  | C----CTTTT |
| L.japonicus          | ATGTTGCATT | TAGCATTTAT | ATGACTCAGT  | ACGCGGGGA   | C----CTTTT |
| L.ochroleucus        | AAGTGGCCTT | CAGCGTCTAT | TTAACCCGGT  | ACACAGGTAA  | C----CTTTT |
| L.littoralis         | ACGTAGCCTT | CAACATATAT | ATTAGCCGGT  | ACACGTGGGA  | G----CTTTT |
| L.venosus            | AGGTTGCCTT | CAGCATATAC | ATAAGCCAGT  | ATACAGGGAG  | C----CTTTT |
| L.graminifolius      | ACGTTGCCTT | CAACATTTTT | CTCACTCGCC  | ACATAGGGGT  | C----CTTTT |
| L.pubescens          | GTGTTGGGTT | GAATCTATAC | GTGGCGTTCT  | ATCTCGGTCTG | TA-TACTTTC |
| L.sativus_KJ         | TTCTTGCATG | GAACTTACCT | TTTAAGTATA  | TTAAAAGTAA  | TAGTTCTTCT |
| L.sativus_HM         | TTCTTGCATG | GAACTTACCT | TTTAAGTATA  | TTAAAAGTAA  | TAGTTCTTCT |
| L.pseudocicera       | ---ATGCATG | GAACTTACCT | GTTATGGATA  | ATAAAGACAA  | TCATTCTTCT |
| L.chloranthus        | -----      | -----      | -----       | -----       | -----      |
| L.pratensis          | -----      | -----      | -----       | -----       | -----      |
| L.odoratus_HM        | -----      | -----      | -----       | -----       | -----      |
| L.odoratus_kJ        | -----      | -----      | -----       | -----       | -----      |
| L.hirsutus           | -----      | -----      | -----       | -----       | -----      |
| L.annuus             | -----      | -----      | -----       | -----       | -----      |
| L.cirrhosus          | AATTTTTGTT | ATTTTTTTGA | ACCTTTTTTTT | GAACGGAGCT  | TTAATCTTGA |
| L.latifolius         | AATTTTTGTT | ATTTTTTTGA | CCCTTTTTTTG | TAACGGAGCT  | TTAATCTTGA |
| L.tingitanus         | -----      | -----      | -----       | -----       | -----      |
| Pisum sativum_H      | -----      | -----      | -----       | -----       | -----      |
| Pisum sativum_K      | -----      | -----      | -----       | -----       | -----      |
| Pisum sativum_HG     | -----      | -----      | -----       | -----       | -----      |
| Pisum fulvum         | -----      | -----      | -----       | -----       | -----      |
| Vavilovia formosa    | -----      | -----      | -----       | -----       | -----      |
| L.clymenum           | -----      | -----      | -----       | -----       | -----      |
| L.ochrus             | -----      | -----      | -----       | -----       | -----      |

|                            |       |       |       |       |       |
|----------------------------|-------|-------|-------|-------|-------|
| Trifolium strictum         | ----- | ----- | ----- | ----- | ----- |
| T. glanduliferum           | ----- | ----- | ----- | ----- | ----- |
| T. boissieri               | ----- | ----- | ----- | ----- | ----- |
| T. aureum                  | ----- | ----- | ----- | ----- | ----- |
| T. meduseum                | ----- | ----- | ----- | ----- | ----- |
| T. subterraneum            | ----- | ----- | ----- | ----- | ----- |
| T. pratense                | ----- | ----- | ----- | ----- | ----- |
| T. hybridum                | ----- | ----- | ----- | ----- | ----- |
| T. semipilosum             | ----- | ----- | ----- | ----- | ----- |
| T. occidentale             | ----- | ----- | ----- | ----- | ----- |
| T. repens                  | ----- | ----- | ----- | ----- | ----- |
| T. lupinaster              | ----- | ----- | ----- | ----- | ----- |
| Cicer oxyodon              | ----- | ----- | ----- | ----- | ----- |
| C. chorrassanicum          | ----- | ----- | ----- | ----- | ----- |
| C. arietinum               | ----- | ----- | ----- | ----- | ----- |
| Medicago truncatula_KF     | ----- | ----- | ----- | ----- | ----- |
| M. truncatula_AC           | ----- | ----- | ----- | ----- | ----- |
| M. sativa_K                | ----- | ----- | ----- | ----- | ----- |
| M. sativa                  | ----- | ----- | ----- | ----- | ----- |
| M. papillosa               | ----- | ----- | ----- | ----- | ----- |
| M. hybrida                 | ----- | ----- | ----- | ----- | ----- |
| M. falcata                 | ----- | ----- | ----- | ----- | ----- |
| M. sativa_KU               | ----- | ----- | ----- | ----- | ----- |
| Melilotus albus            | ----- | ----- | ----- | ----- | ----- |
| Hedysarum formosum         | ----- | ----- | ----- | ----- | ----- |
| H. varium                  | ----- | ----- | ----- | ----- | ----- |
| H. singarense              | ----- | ----- | ----- | ----- | ----- |
| H. minjanense              | ----- | ----- | ----- | ----- | ----- |
| Tavniera glabra            | ----- | ----- | ----- | ----- | ----- |
| T. diffusa                 | ----- | ----- | ----- | ----- | ----- |
| Greuteria membranacea      | ----- | ----- | ----- | ----- | ----- |
| Corethroedendron scoparium | ----- | ----- | ----- | ----- | ----- |
| Eversmannia subspinosa     | ----- | ----- | ----- | ----- | ----- |
| Onobrychis bungei          | ----- | ----- | ----- | ----- | ----- |
| O. cornuta                 | ----- | ----- | ----- | ----- | ----- |
| O. michauxii               | ----- | ----- | ----- | ----- | ----- |
| O. subacaulis              | ----- | ----- | ----- | ----- | ----- |
| O. teheranica              | ----- | ----- | ----- | ----- | ----- |
| Alhagi maurorum            | ----- | ----- | ----- | ----- | ----- |
| Caragana microphylla       | ----- | ----- | ----- | ----- | ----- |
| C. korshinski              | ----- | ----- | ----- | ----- | ----- |
| C. kozlowii                | ----- | ----- | ----- | ----- | ----- |
| C. rosea                   | ----- | ----- | ----- | ----- | ----- |
| Tibetia liangshanensis     | ----- | ----- | ----- | ----- | ----- |
| Gueldenstaedtia verna      | ----- | ----- | ----- | ----- | ----- |
| Halimodendron halodendron  | ----- | ----- | ----- | ----- | ----- |
| Smirnowia turkestanica     | ----- | ----- | ----- | ----- | ----- |
| Eremosparton flaccidum     | ----- | ----- | ----- | ----- | ----- |
| Colutea persica            | ----- | ----- | ----- | ----- | ----- |
| C. triphylla               | ----- | ----- | ----- | ----- | ----- |
| Sphaerophysa salsula       | ----- | ----- | ----- | ----- | ----- |
| Podlechiella vogelii       | ----- | ----- | ----- | ----- | ----- |
| Carmichaelia australis     | ----- | ----- | ----- | ----- | ----- |
| Sutherlandia frutescens    | ----- | ----- | ----- | ----- | ----- |
| Astragalus membranaceus    | ----- | ----- | ----- | ----- | ----- |
| A. mongholicus             | ----- | ----- | ----- | ----- | ----- |
| A. nakaianus               | ----- | ----- | ----- | ----- | ----- |
| A. macropelmatus           | ----- | ----- | ----- | ----- | ----- |
| A. iranicus                | ----- | ----- | ----- | ----- | ----- |
| A. denudatus               | ----- | ----- | ----- | ----- | ----- |
| A. odoratus                | ----- | ----- | ----- | ----- | ----- |
| Oxytropis szovitsii        | ----- | ----- | ----- | ----- | ----- |
| O. iranica                 | ----- | ----- | ----- | ----- | ----- |
| O. kotschyana              | ----- | ----- | ----- | ----- | ----- |
| Erophaca baetica           | ----- | ----- | ----- | ----- | ----- |
| Wisteria floribunda        | ----- | ----- | ----- | ----- | ----- |
| W. sinensis                | ----- | ----- | ----- | ----- | ----- |
| Glycyrrhiza lepidota       | ----- | ----- | ----- | ----- | ----- |
| G. uralensis               | ----- | ----- | ----- | ----- | ----- |
| G. glabra                  | ----- | ----- | ----- | ----- | ----- |
| Meristotropis xathioides   | ----- | ----- | ----- | ----- | ----- |
| Robinia pseudoacacia       | ----- | ----- | ----- | ----- | ----- |
| Lotus japonicus            | ----- | ----- | ----- | ----- | ----- |
| Vicia alpestris            | ----- | ----- | ----- | ----- | ----- |
| V. sativa                  | ----- | ----- | ----- | ----- | ----- |
| V. peregrina               | ----- | ----- | ----- | ----- | ----- |
| V. sepium                  | ----- | ----- | ----- | ----- | ----- |
| V. faba                    | ----- | ----- | ----- | ----- | ----- |

|                      |            |            |            |            |            |
|----------------------|------------|------------|------------|------------|------------|
| V.canescens          | -----      | -----      | -----      | -----      | -----      |
| V.monantha           | -----      | -----      | -----      | -----      | -----      |
| V.tetrasperma        | -----      | -----      | -----      | -----      | -----      |
| V.narbonensis        | -----      | -----      | -----      | -----      | -----      |
| Lens culinaris       | -----      | -----      | -----      | -----      | -----      |
| L.orientalis         | -----      | -----      | -----      | -----      | -----      |
| V.ervilia            | -----      | -----      | -----      | -----      | -----      |
| Galega officinalis   | -----      | -----      | -----      | -----      | -----      |
| Lathyrus palustris_K | A-----AG   | AAAGGTCAAT | CTTGATCTAA | C--AGATAAA | CTCGCCTTTA |
| L.palustris_H        | A-----AG   | AAGTGTAAC  | CTTGATCTAA | A--AGATAAA | CTAGCTGTTA |
| L.davidii            | C-----AG   | ACAATTAAAT | CTTGATGTAA | G--AAATAAG | CTAGCCCTTC |
| L.japonicus          | A-----AG   | AAAATTGAAC | CTTGATCTAA | G--AGATAAG | CTCGCCTTTA |
| L.ochroleucus        | A-----AG   | AAAATTAAAT | CTGGATCTAA | G--TGATAAG | CTGGCCTTTG |
| L.littoralis         | A-----AG   | AAAATTAAAC | CTAGATCTAA | C--AGATAAG | CTCGCCTTTA |
| L.venosus            | A-----AG   | AAAATTAAAT | ATGGACCTAA | G--TGATAAG | CTGGCCTTTG |
| L.graminifolius      | A-----AA   | AAAATTAAAC | CTGGATTTAA | G--CGATAAG | CTGGCCTTTG |
| L.pubescens          | GCGGCGCTAT | GGAATCCAAC | CTGTTCTTAA | CCTTATCGAC | CCACCCTTTC |
| L.sativus_KJ         | CCTAGAAAGA | AGCCGCCCGT | ATCCGCCACA | CATCCTGGTG | GATTTATTTA |
| L.sativus_HM         | CCTAGAAAGA | AGCCGCCCGT | ATCCGCCACA | CATCCTGGTG | GATTTATTTA |
| L.pseudocicera       | CGTGCACAAA | AGCC---CAT | CTAAGACAAA | CATTGTGTTG | GATTTCTTAA |
| L.chloranthus        | -----      | -----      | -----      | -----      | -----      |
| L.pratensis          | -----      | -----      | -----      | -----      | -----      |
| L.odoratus_HM        | -----      | -----      | -----      | -----      | -----      |
| L.odoratus_kJ        | -----      | -----      | -----      | -----      | -----      |
| L.hirsutus           | -----      | -----      | -----      | -----      | -----      |
| L.annuus             | -----      | -----      | -----      | -----      | -----      |
| L.cirrhosus          | TGATCATAAA | AGTGATCAAT | ATGAGCCTTG | CAATAACCCA | AGTTACGCAA |
| L.latifolius         | TGATCATAAA | AATGATCAAT | ATAGGCCTTG | CAATAACCCA | AGTTACGCAA |
| L.tingitanus         | -----      | -----      | -----      | -----      | -----      |
| Pisum sativum_H      | -----      | -----      | -----      | -----      | -----      |
| Pisum sativum_K      | -----      | -----      | -----      | -----      | -----      |
| Pisum sativum_HG     | -----      | -----      | -----      | -----      | -----      |
| Pisum fulvum         | -----      | -----      | -----      | -----      | -----      |
| Vavilovia formosa    | -----      | -----      | -----      | -----      | -----      |
| L.clymenum           | -----      | -----      | -----      | -----      | -----      |
| L.ochrus             | -----      | -----      | -----      | ATGAAGAATA | GCATGGAAAA |

|                            |       |       |       |       |       |
|----------------------------|-------|-------|-------|-------|-------|
| Trifolium strictum         | ----- | ----- | ----- | ----- | ----- |
| T. glanduliferum           | ----- | ----- | ----- | ----- | ----- |
| T. boissieri               | ----- | ----- | ----- | ----- | ----- |
| T. aureum                  | ----- | ----- | ----- | ----- | ----- |
| T. meduseum                | ----- | ----- | ----- | ----- | ----- |
| T. subterraneum            | ----- | ----- | ----- | ----- | ----- |
| T. pratense                | ----- | ----- | ----- | ----- | ----- |
| T. hybridum                | ----- | ----- | ----- | ----- | ----- |
| T. semipilosum             | ----- | ----- | ----- | ----- | ----- |
| T. occidentale             | ----- | ----- | ----- | ----- | ----- |
| T. repens                  | ----- | ----- | ----- | ----- | ----- |
| T. lupinaster              | ----- | ----- | ----- | ----- | ----- |
| Cicer oxyodon              | ----- | ----- | ----- | ----- | ----- |
| C. chorrassanicum          | ----- | ----- | ----- | ----- | ----- |
| C. arietinum               | ----- | ----- | ----- | ----- | ----- |
| Medicago truncatula_KF     | ----- | ----- | ----- | ----- | ----- |
| M. truncatula_AC           | ----- | ----- | ----- | ----- | ----- |
| M. sativa_K                | ----- | ----- | ----- | ----- | ----- |
| M. sativa                  | ----- | ----- | ----- | ----- | ----- |
| M. papillosa               | ----- | ----- | ----- | ----- | ----- |
| M. hybrida                 | ----- | ----- | ----- | ----- | ----- |
| M. falcata                 | ----- | ----- | ----- | ----- | ----- |
| M. sativa_KU               | ----- | ----- | ----- | ----- | ----- |
| Melilotus albus            | ----- | ----- | ----- | ----- | ----- |
| Hedysarum formosum         | ----- | ----- | ----- | ----- | ----- |
| H. varium                  | ----- | ----- | ----- | ----- | ----- |
| H. singarense              | ----- | ----- | ----- | ----- | ----- |
| H. minjanense              | ----- | ----- | ----- | ----- | ----- |
| Tavniera glabra            | ----- | ----- | ----- | ----- | ----- |
| T. diffusa                 | ----- | ----- | ----- | ----- | ----- |
| Greuteria membranacea      | ----- | ----- | ----- | ----- | ----- |
| Corethroedendron scoparium | ----- | ----- | ----- | ----- | ----- |
| Eversmannia subspinosa     | ----- | ----- | ----- | ----- | ----- |
| Onobrychis bungei          | ----- | ----- | ----- | ----- | ----- |
| O. cornuta                 | ----- | ----- | ----- | ----- | ----- |
| O. michauxii               | ----- | ----- | ----- | ----- | ----- |
| O. subacaulis              | ----- | ----- | ----- | ----- | ----- |
| O. teheranica              | ----- | ----- | ----- | ----- | ----- |
| Alhagi maurorum            | ----- | ----- | ----- | ----- | ----- |
| Caragana microphylla       | ----- | ----- | ----- | ----- | ----- |
| C. korshinski              | ----- | ----- | ----- | ----- | ----- |
| C. kozlowii                | ----- | ----- | ----- | ----- | ----- |
| C. rosea                   | ----- | ----- | ----- | ----- | ----- |
| Tibetia liangshanensis     | ----- | ----- | ----- | ----- | ----- |
| Gueldenstaedtia verna      | ----- | ----- | ----- | ----- | ----- |
| Halimodendron halodendron  | ----- | ----- | ----- | ----- | ----- |
| Smirnowia turkestanica     | ----- | ----- | ----- | ----- | ----- |
| Eremosparton flaccidum     | ----- | ----- | ----- | ----- | ----- |
| Colutea persica            | ----- | ----- | ----- | ----- | ----- |
| C. triphylla               | ----- | ----- | ----- | ----- | ----- |
| Sphaerophysa salsula       | ----- | ----- | ----- | ----- | ----- |
| Podlechiella vogelii       | ----- | ----- | ----- | ----- | ----- |
| Carmichaelia australis     | ----- | ----- | ----- | ----- | ----- |
| Sutherlandia frutescens    | ----- | ----- | ----- | ----- | ----- |
| Astragalus membranaceus    | ----- | ----- | ----- | ----- | ----- |
| A. mongholicus             | ----- | ----- | ----- | ----- | ----- |
| A. nakaianus               | ----- | ----- | ----- | ----- | ----- |
| A. macropelmatus           | ----- | ----- | ----- | ----- | ----- |
| A. iranicus                | ----- | ----- | ----- | ----- | ----- |
| A. denudatus               | ----- | ----- | ----- | ----- | ----- |
| A. odoratus                | ----- | ----- | ----- | ----- | ----- |
| Oxytropis szovitsii        | ----- | ----- | ----- | ----- | ----- |
| O. iranica                 | ----- | ----- | ----- | ----- | ----- |
| O. kotschyana              | ----- | ----- | ----- | ----- | ----- |
| Erophaca baetica           | ----- | ----- | ----- | ----- | ----- |
| Wisteria floribunda        | ----- | ----- | ----- | ----- | ----- |
| W. sinensis                | ----- | ----- | ----- | ----- | ----- |
| Glycyrrhiza lepidota       | ----- | ----- | ----- | ----- | ----- |
| G. uralensis               | ----- | ----- | ----- | ----- | ----- |
| G. glabra                  | ----- | ----- | ----- | ----- | ----- |
| Meristotropis xathioides   | ----- | ----- | ----- | ----- | ----- |
| Robinia pseudoacacia       | ----- | ----- | ----- | ----- | ----- |
| Lotus japonicus            | ----- | ----- | ----- | ----- | ----- |
| Vicia alpestris            | ----- | ----- | ----- | ----- | ----- |
| V. sativa                  | ----- | ----- | ----- | ----- | ----- |
| V. peregrina               | ----- | ----- | ----- | ----- | ----- |
| V. sepium                  | ----- | ----- | ----- | ----- | ----- |
| V. faba                    | ----- | ----- | ----- | ----- | ----- |

|                      |            |            |             |            |            |
|----------------------|------------|------------|-------------|------------|------------|
| V.canescens          | -----      | -----      | -----       | -----      | -----      |
| V.monantha           | -----      | -----      | -----       | -----      | -----      |
| V.tetrasperma        | -----      | -----      | -----       | -----      | -----      |
| V.narbonensis        | -----      | -----      | -----       | -----      | -----      |
| Lens culinaris       | -----      | -----      | -----       | -----      | -----      |
| L.orientalis         | -----      | -----      | -----       | -----      | -----      |
| V.ervilia            | -----      | -----      | -----       | -----      | -----      |
| Galega officinalis   | -----      | -----      | -----       | -----      | -----      |
| Lathyrus palustris_K | TTACAGCCAC | AGTAGAATTC | TTTGTGATTA  | TACTTCGCAT | TGTT-----  |
| L.palustris_H        | TTACAGCCAC | AGTAGAATTC | TTTGTTCATTA | TACTTCGAAT | TGTT-----  |
| L.davidii            | TTACCGCAGT | AATAGAATTC | GGAGTAATTA  | TACTGCCAAT | TGTT-----  |
| L.japonicus          | TTACGGCTAT | ATTTGAATTC | TTTGTTCATTA | TACTGCGCAT | TGTT-----  |
| L.ochroleucus        | TTACGGCGAT | ATTAGACTTC | ACAGTAATAA  | TACTGCGCAT | TCTT-----  |
| L.littoralis         | TTACGGCTAT | ATTTGAATTC | TTTGTTCATTA | TACTGCGCAT | TGTT-----  |
| L.venosus            | TTACGGCGAT | AGTAGAATTC | TTTGTGATTA  | TCTTGCGAAT | AGTT-----  |
| L.graminifolius      | TTGTAGCTAT | CGTCGATTC  | TTTGTAATCA  | TACTGCGCAT | CGTT-----  |
| L.pubescens          | TCATGGAACA | AGTGGAAATC | TTGGGAAGTG  | TGGTGAAAAT | GCTTAGTTTG |
| L.sativus_KJ         | TTTTATGTTT | TGCGGCCTTT | CTTTTTAGGA  | ATATCTTTTT | CGTTTTGTTT |
| L.sativus_HM         | TTTTATGTTT | TGCGGCCTTT | CTTTTTAGGA  | ATATCTTTTT | CGTTTTGTTT |
| L.pseudocicera       | TGTTCTGTTT | TGGGGTGTTT | CTGTTTAGGA  | ACATAGTGTT | CGTTTTATTT |
| L.chloranthus        | -----      | -----      | -----       | -----      | -----      |
| L.pratensis          | -----      | -----      | -----       | -----      | -----      |
| L.odoratus_HM        | -----      | -----      | -----       | -----      | -----      |
| L.odoratus_kJ        | -----      | -----      | -----       | -----      | -----      |
| L.hirsutus           | -----      | -----      | -----       | -----      | -----      |
| L.annuus             | -----      | -----      | -----       | -----      | -----      |
| L.cirrhosus          | GATAAC--TT | GGTCTCGTTT | TTGATTGTCC  | TTTTTCTCTT | TTTGTTTCAA |
| L.latifolius         | GATAAC--TT | GGTCTCGTTT | TTGATTGGCC  | TTTTTCTCTT | CTTGTTTCAA |
| L.tingitanus         | -----      | -----      | -----       | -----      | -----      |
| Pisum sativum_H      | -----      | -----      | -----       | -----      | -----      |
| Pisum sativum_K      | -----      | -----      | -----       | -----      | -----      |
| Pisum sativum_HG     | -----      | -----      | -----       | -----      | -----      |
| Pisum fulvum         | -----      | -----      | -----       | -----      | -----      |
| Vavilovia formosa    | -----      | -----      | -----       | -----      | -----      |
| L.clymenum           | -----      | -----      | -----       | -----      | -----      |
| L.ochrus             | ACGGACTCTG | ACTTTGCTGA | ATTTTTATCG  | GGTTAATAAG | AAGGCTATTT |

|                            |       |       |            |            |            |
|----------------------------|-------|-------|------------|------------|------------|
| Trifolium strictum         | ----- | ----- | -ATGTCTGCT | TTATTGGTTC | ATGTTCCAAA |
| T. glanduliferum           | ----- | ----- | -ATGTCTGCT | TTATTGGTTC | ATGTTCCAAA |
| T. boissieri               | ----- | ----- | -ATGTCTGCC | TTATTGGTTC | ATGTTCCAAA |
| T. aureum                  | ----- | ----- | -ATGTCTGCT | TTATTGGTTC | ATGTTCCAAA |
| T. meduseum                | ----- | ----- | -ATGTCTGCT | TTATTGGTTC | ATGTTCCCAA |
| T. subterraneum            | ----- | ----- | -ATGTCTGCT | TTATTGGTTC | ATGTTCCCAA |
| T. pratense                | ----- | ----- | -ATGTCTGCT | TTATTGGTTC | ATGTTCCAAA |
| T. hybridum                | ----- | ----- | -ATGTCTGCT | TTATTGGTTC | ATGTTCCAAA |
| T. semipilosum             | ----- | ----- | -ATGTCTGCT | TTATTGGTTC | ATGTTCCAAA |
| T. occidentale             | ----- | ----- | -ATGTCTGCT | TTATTAGTTC | ATGTTCCAAA |
| T. repens                  | ----- | ----- | -ATGTCTGCT | TTATTAGTTC | ATGTTCCAAA |
| T. lupinaster              | ----- | ----- | -ATGTCTGCT | TTATTGGTTC | ATGTTCCAAA |
| Cicer oxyodon              | ----- | ----- | -ATGTCTGCT | TTATTCGTTT | ATGTTCCAAA |
| C. chorrassanicum          | ----- | ----- | -ATGTCTGTT | TTATTCGTTT | ATGTTCCAAA |
| C. arietinum               | ----- | ----- | -ATGTCTGCT | TTATTCGTTT | ATGTTCCAAA |
| Medicago truncatula_KF     | ----- | ----- | -ATGTCTGCT | TTATTGGTTA | ATGTTCCAAA |
| M. truncatula_AC           | ----- | ----- | -ATGTCTGCT | TTATTGGTTA | ATGTTCCAAA |
| M. sativa_K                | ----- | ----- | -ATGTCTGCT | TTATTGGTTA | ATGTTCCAAA |
| M. sativa                  | ----- | ----- | -ATGTCTGCT | TTATTGGTTA | ATGTTCCAAA |
| M. papillosa               | ----- | ----- | -ATGTCTGCT | TTATTGGTTA | ATGTTCCAAA |
| M. hybrida                 | ----- | ----- | -ATGTCTGCT | TTATTGGTTA | ATGTTCCAAA |
| M. falcata                 | ----- | ----- | -ATGTCTGCT | TTATTGGTTA | ATGTTCCAAA |
| M. sativa_KU               | ----- | ----- | -ATGTCTGCT | TTATTGGTTA | ATGTTCCAAA |
| Melilotus albus            | ----- | ----- | -ATGTCTGCT | TTATTGGTTA | ATGTTCCAAA |
| Hedysarum formosum         | ----- | ----- | -----      | -----      | -----      |
| H. varium                  | ----- | ----- | -----      | -----      | -----      |
| H. singarense              | ----- | ----- | -----      | -----      | -----      |
| H. minjanense              | ----- | ----- | -----      | -----      | -----      |
| Tavniera glabra            | ----- | ----- | -----      | -----      | -----      |
| T. diffusa                 | ----- | ----- | -----      | -----      | -----      |
| Greuteria membranacea      | ----- | ----- | -----      | -----      | -----      |
| Corethroedendron scoparium | ----- | ----- | -----      | -----      | -----      |
| Eversmannia subspinosa     | ----- | ----- | -----      | -----      | -----      |
| Onobrychis bungei          | ----- | ----- | -----      | -----      | -----      |
| O. cornuta                 | ----- | ----- | -----      | -----      | -----      |
| O. michauxii               | ----- | ----- | -----      | -----      | -----      |
| O. subacaulis              | ----- | ----- | -----      | -----      | -----      |
| O. teheranica              | ----- | ----- | -----      | -----      | -----      |
| Alhagi maurorum            | ----- | ----- | -----      | -----      | -----      |
| Caragana microphylla       | ----- | ----- | -----      | -----      | -----      |
| C. korshinski              | ----- | ----- | -----      | -----      | -----      |
| C. kozlowii                | ----- | ----- | -----      | -----      | -----      |
| C. rosea                   | ----- | ----- | -----      | -----      | -----      |
| Tibetia liangshanensis     | ----- | ----- | -----      | -----      | -----      |
| Gueldenstaedtia verna      | ----- | ----- | -----      | -----      | -----      |
| Halimodendron halodendron  | ----- | ----- | -----      | -----      | -----      |
| Smirnowia turkestanica     | ----- | ----- | -----      | -----      | -----      |
| Eremosparton flaccidum     | ----- | ----- | -----      | -----      | -----      |
| Colutea persica            | ----- | ----- | -----      | -----      | -----      |
| C. triphylla               | ----- | ----- | -----      | -----      | -----      |
| Sphaerophysa salsula       | ----- | ----- | -----      | -----      | -----      |
| Podlechiella vogelii       | ----- | ----- | -----      | -----      | -----      |
| Carmichaelia australis     | ----- | ----- | -----      | -----      | -----      |
| Sutherlandia frutescens    | ----- | ----- | -----      | -----      | -----      |
| Astragalus membranaceus    | ----- | ----- | -----      | -----      | -----      |
| A. mongholicus             | ----- | ----- | -----      | -----      | -----      |
| A. nakaianus               | ----- | ----- | -----      | -----      | -----      |
| A. macropelmatus           | ----- | ----- | -----      | -----      | -----      |
| A. iranicus                | ----- | ----- | -----      | -----      | -----      |
| A. denudatus               | ----- | ----- | -----      | -----      | -----      |
| A. odoratus                | ----- | ----- | -----      | -----      | -----      |
| Oxytropis szovitsii        | ----- | ----- | -----      | -----      | -----      |
| O. iranica                 | ----- | ----- | -----      | -----      | -----      |
| O. kotschyana              | ----- | ----- | -----      | -----      | -----      |
| Erophaca baetica           | ----- | ----- | -----      | -----      | -----      |
| Wisteria floribunda        | ----- | ----- | -----      | -----      | -----      |
| W. sinensis                | ----- | ----- | -----      | -----      | -----      |
| Glycyrrhiza lepidota       | ----- | ----- | -----      | -----      | -----      |
| G. uralensis               | ----- | ----- | -----      | -----      | -----      |
| G. glabra                  | ----- | ----- | -----      | -----      | -----      |
| Meristotropis xathioides   | ----- | ----- | -----      | -----      | -----      |
| Robinia pseudoacacia       | ----- | ----- | -----      | -----      | -----      |
| Lotus japonicus            | ----- | ----- | -----      | -----      | -----      |
| Vicia alpestris            | ----- | ----- | -ATGTCTGCT | TTATTGGTTC | CTGTTCCAAA |
| V. sativa                  | ----- | ----- | -ATGTCTGCT | TTATTGGTTC | ATGTTACAAA |
| V. peregrina               | ----- | ----- | -ATGTCTGCT | TTATTGGTTC | ATGTTACAAA |
| V. sepium                  | ----- | ----- | -ATGTCTGCT | TTATTGGTTC | ATGTTACAAA |
| V. faba                    | ----- | ----- | -ATGTCTGCT | TTATTGGTTC | ATGTTCCAAA |

|                      |             |            |            |            |             |
|----------------------|-------------|------------|------------|------------|-------------|
| V.canescens          | -----       | -----      | -ATGTCTGCT | TTATTGGTTC | ATGTTCCAAA  |
| V.monantha           | -----       | -----      | -ATGTCTGCT | TTATTGGTTC | ATGTTCCAAA  |
| V.tetrasperma        | -----       | -----      | -ATGTCTGGT | TTATTGGTTC | ATGTTCCAAA  |
| V.narbonensis        | -----       | -----      | -ATGTCTGCT | TTATTGGTTC | ATGTTCCAAA  |
| Lens culinaris       | -----       | -----      | -ATGTCTGCT | TTCTTGGTTC | ATGTTCCAAA  |
| L.orientalis         | -----       | -----      | -ATGTCTGCT | TTCTTGGTTC | AAGTTCCAAA  |
| V.ervilia            | -----       | -----      | -ATGTCTGCT | TTATTGGTTC | CTGTTCCAAA  |
| Galega officinalis   | -----       | -----      | -ATGTCGACT | TTATTGGTGA | ATGTTCCCTAA |
| Lathyrus palustris_K | -----CTAG   | TGTGGCTTTT | TTTATATTAT | TTGATAGAAA | GAACTTTTTCG |
| L.palustris_H        | -----CTAG   | TGTGGCTTTT | TTTATATTAT | TTGATAGAAA | GAACATTTCG  |
| L.davidii            | -----CTAG   | TGTGGCTTTT | TTTCTATTTT | TTGATGGAAA | AGACATTTCG  |
| L.japonicus          | -----CTAG   | TGTGGCTTTT | TGTATATTAT | TTGATAGAAA | CAACTTTTTCG |
| L.ochroleucus        | -----CTAG   | TGTGGCTTTT | TTTCTATTAT | TTGATAGAAC | GGACTGTTTCG |
| L.littoralis         | -----CTAG   | TGTGGCTTTT | TTTATATTAT | TTGATCGAAA | GAACCATTCG  |
| L.venosus            | -----CTGG   | TGTGGCTTTT | TTTATATTAT | TTGATAGAAA | GAACATTTCG  |
| L.graminifolius      | -----CTGG   | TGTGGCTTTT | TCTATATTAT | TTGATAGAAA | GAACTTTTTCG |
| L.pubescens          | ATCCCCCTTG  | GATTGCTTCT | TTTCTTGAAT | AGTGTAGGAA | AATCCATTTG  |
| L.sativus_KJ         | TTTTATTTCC  | TTAGAACAAT | TTTGGATTAT | TTACTTCAAA | TGATCCGTGA  |
| L.sativus_HM         | TTTTATTTCC  | TTAGAACAAT | TTTGGATTAT | TTACTTCAAA | TGATCCGTGA  |
| L.pseudocicera       | TTTTATTTTCG | TTAGAACAAT | TTTTAATTAT | TTACTTCAAA | TCGTCCATGA  |
| L.chloranthus        | -----       | -----      | -----      | -----      | -----       |
| L.pratensis          | -----       | -----      | -----      | -----      | -----       |
| L.odoratus_HM        | -----       | -----      | -----      | -----      | -----       |
| L.odoratus_kJ        | -----       | -----      | -----      | -----      | -----       |
| L.hirsutus           | -----       | -----      | -----      | -----      | -----       |
| L.annuus             | -----       | -----      | -----      | -----      | -----       |
| L.cirrhosus          | AGTCAATTTT  | ATAAGCGTGT | TGTACCCTAT | TTATTTCAAA | CCGGCATTAA  |
| L.latifolius         | ATTCAATTTG  | GAAGGCGTGT | TGTATCCTAT | TTATTTCAAA | CCGGCATTAA  |
| L.tingitanus         | -----       | -----      | -----      | -----      | -----       |
| Pisum sativum_H      | -----       | -----      | -----      | -----      | -----       |
| Pisum sativum_K      | -----       | -----      | -----      | -----      | -----       |
| Pisum sativum_HG     | -----       | -----      | -----      | -----      | -----       |
| Pisum fulvum         | -----       | -----      | -----      | -----      | -----       |
| Vavilovia formosa    | -----       | -----      | -----      | -----      | -----       |
| L.clymenum           | -----       | -----      | -----      | -----      | -----       |
| L.ochrus             | ATATGGATAT  | AAATGTGCCG | GTTATAAAGG | TGAATATACT | ATTAGGAGCT  |



|                            |            |            |            |            |             |
|----------------------------|------------|------------|------------|------------|-------------|
| Trifolium strictum         | ATTAATTAGT | TGGGGATCAG | AAAAACATGG | TTGTC----- | ----GTTTCAC |
| T. glanduliferum           | ATTCATTAGT | TGGGGATCAG | AAAAACATGG | TTGTC----- | ----GTTTCAC |
| T. boissieri               | ATTCATTAGT | GGGGGATCAG | AAAAACATGG | TTGTC----- | ----GTTTCAC |
| T. aureum                  | ATTCATTAGT | GGGGGATCAG | AAAAACATGG | TTGTC----- | ----GTTTCAC |
| T. meduseum                | ATTCATTAGT | TGGGAAGCAG | AAAAACATGG | TTGTC----- | ----GTTTCAC |
| T. subterraneum            | ATTCATTAGT | TGGGAAGCAG | AAAAACATGG | TTGTC----- | ----GTTTCAC |
| T. pratense                | ATTAATTAGT | TGGGGATCAG | AAAAACATGG | TTGTC----- | ----GTTTCAC |
| T. hybridum                | ATTCATTAGT | TGGGGATCAA | AAAAACATGG | TTGTC----- | ----GTTTCAC |
| T. semipilosum             | ATTCATTAGT | TGGGGATCAA | AAAAACATGG | TTGTC----- | ----GTTTCAC |
| T. occidentale             | ATTCATTAGT | TGGGGATCGA | AAAAACAGGG | TTGTC----- | ----GTTTCAC |
| T. repens                  | ATTCATTAGT | TGGAGATCGA | AAAAACAGGG | TTGTC----- | ----GTTTCAC |
| T. lupinaster              | ATTCATTAGT | TGGGGATCAG | AAAAACATGG | TTGTC----- | ----GTTTCAC |
| Cicer oxyodon              | ATTCATT--- | TTGGGGTCAG | AAAAATATGT | TTGTC----- | ----GTTTCAC |
| C. chorrassanicum          | ATTCATT--- | TTGGGGTCAG | AAAAATATGT | TTGTC----- | ----GTTTCAC |
| C. arietinum               | ATTCATT--- | TTGGGGTCAG | AAAAATATGT | TTGTC----- | ----GCTCAC  |
| Medicago truncatula_KF     | ATTAATTAGT | TGGGGATCAG | AAAAATATGG | TTGTC----- | ----GTTTCAC |
| M. truncatula_AC           | ATTTATTAGT | TGGGGATCAG | AAAAACATGG | TTGTC----- | ----GTTTCAC |
| M. sativa_K                | ATTCATTAGT | TGGGGATCAG | AAAAACATGG | TTGTC----- | ----GTTTCAC |
| M. sativa                  | ATTCATTAGT | TGGGGATCAG | AAAAACATGG | TTGTC----- | ----GTTTCAC |
| M. papillosa               | ATTCATTAGT | TGGGGATCAG | AAAAACATGG | TTGTC----- | ----GTTTCAC |
| M. hybrida                 | ATTCATTAGT | TGGGGATCAG | AAAAACATGG | TTGTC----- | ----GTTTCAC |
| M. falcata                 | ATTCATTAGT | TGGGGATCAG | AAAAACATGG | TTGTC----- | ----GTTTCAC |
| M. sativa_KU               | ATTCATTAGT | TGGGGATCAG | AAAAACATGG | TTGTC----- | ----GTTTCAC |
| Melilotus albus            | ATTCGTTAGT | TGGGGATCAG | AAAAACATGG | TTGTC----- | ----GTTTCAC |
| Hedysarum formosum         | -----      | -----      | --ATGCGTAG | CTTCCAA--- | ---GGACAAG  |
| H. varium                  | -----      | -----      | --ATGCGTAG | CTTCCAA--- | ---GGACAAG  |
| H. singarense              | -----      | -----      | --ATGCGTAG | CTTCCAA--- | ---GGACAAG  |
| H. minjanense              | -----      | -----      | --ATGCGTAG | CTTCCAA--- | ---GGACAAG  |
| Tavniera glabra            | -----      | -----      | --ATGCGTAG | CTTCCAA--- | ---GGACAAG  |
| T. diffusa                 | -----      | -----      | --ATGCGTAG | CTTCCAA--- | ---GGACAAG  |
| Greuteria membranacea      | -----      | -----      | --ATGCGTAG | CTTCCAA--- | ---GGACAAG  |
| Corethroedendron scoparium | -----      | -----      | --ATGCGTAG | CTTCCAA--- | ---GGACAAG  |
| Eversmannia subspinosa     | -----      | -----      | --ATGCGTAG | CTTCCAA--- | ---GGACAAG  |
| Onobrychis bungei          | -----      | -----      | --ATGCGTAG | CTTCCAA--- | ---GGACAAG  |
| O. cornuta                 | -----      | -----      | --ATGCGTAG | CTTCCAA--- | ---GGACAAG  |
| O. michauxii               | -----      | -----      | --ATGCGTAG | CTTCCAA--- | ---GGACAAG  |
| O. subacaulis              | -----      | -----      | --ATGCGTAG | CTTCCAA--- | ---GGACAAG  |
| O. teheranica              | -----      | -----      | --ATGCGTAG | CTTCCAA--- | ---GAACAAG  |
| Alhagi maurorum            | -----      | -----      | --ATGCGTCC | CTTCCAA--- | ---GAACAAG  |
| Caragana microphylla       | -----      | -----      | --ATGCGTCC | CTACCAA--- | ---GAACAAG  |
| C. korshinski              | -----      | -----      | --ATGCGTCC | CTACCAA--- | ---GAACAAG  |
| C. kozlowii                | -----      | -----      | --ATGCGTCC | CTACCAA--- | ---GAACAAG  |
| C. rosea                   | -----      | -----      | --ATGCGTCC | CTACCAA--- | ---GAACAAG  |
| Tibetia liangshanensis     | -----      | -----      | --ATGCGTCC | CTTC-----  | -----CAAG   |
| Gueldenstaedtia verna      | -----      | -----      | --ATGCGTCC | CTTC-----  | -----CAAA   |
| Halimodendron halodendron  | -----      | -----      | --ATGTCTCG | ATTCCAA--- | ---GATCTCA  |
| Smirnowia turkestanica     | -----      | -----      | --ATGCGTCC | CTTC-----  | -----GCAG   |
| Eremosparton flaccidum     | -----      | -----      | --ATGCGTCC | CTTC-----  | -----GCAG   |
| Colutea persica            | -----      | -----      | --ATGCGTCC | CTTC-----  | -----GCAG   |
| C. triphylla               | -----      | -----      | --ATGCGTCC | CTTC-----  | -----GCAG   |
| Sphaerophylla salsula      | -----      | -----      | --ATGCGTCC | CTTC-----  | -----GCAG   |
| Podlechiella vogelii       | -----      | -----      | --ATGCGTCC | CTTC-----  | -----GCAG   |
| Carmichaelia australis     | -----      | -----      | --ATGCGTCC | CTTC-----  | -----GCAG   |
| Sutherlandia frutescens    | -----      | -----      | --ATGCGTCC | CTTC-----  | -----GCAG   |
| Astragalus membranaceus    | -----      | -----      | --ATGCGTCC | CTTC-----  | -----GCAG   |
| A. mongholicus             | -----      | -----      | --ATGCGTCC | CTTC-----  | -----GCAG   |
| A. nakaianus               | -----      | -----      | --ATGCGTCC | CTTC-----  | -----GCAG   |
| A. macropelmatus           | -----      | -----      | --ATGCGTCC | CTTC-----  | -----GCAG   |
| A. iranicus                | -----      | -----      | --ATGCGTCC | CTTC-----  | -----GCAG   |
| A. denudatus               | -----      | -----      | --ATGCGTCC | CTTC-----  | -----GCAG   |
| A. odoratus                | -----      | -----      | --ATGCGTCC | CTTC-----  | -----GCAG   |
| Oxytropis szovitsii        | -----      | -----      | --ATGCGTCC | CTTC-----  | -----GCAG   |
| O. iranica                 | -----      | -----      | --ATGCGTCC | CTTC-----  | -----GCAG   |
| O. kotschyana              | -----      | -----      | --ATGCGTCC | CTTC-----  | -----GCAG   |
| Erophaca baetica           | -----      | -----      | --ATGCGTCC | CTTC-----  | -----GCAG   |
| Wisteria floribunda        | ---ATGATTG | GGGAGTCAAA | ACATGCTTGG | CGCT-----  | -----CAG    |
| W. sinensis                | ---ATGATTG | GGGAGTCAAA | ACATGCTTGG | CGCT-----  | -----CAG    |
| Glycyrrhiza lepidota       | ---ATGACTT | GGGAGTCAGA | ACATGTTTGG | CGCT-----  | -----CAG    |
| G. uralensis               | ---ATGACTT | GGGAGTCAGA | ACATGTTTGG | CGCT-----  | -----CAG    |
| G. glabra                  | ---ATGACTT | GGGAGTCAGA | ACATGTTTGG | CGCT-----  | -----CAG    |
| Meristotropis xathioides   | ---ATGACTT | GGGAGTCAGA | ACATGTTTGG | CGCT-----  | -----CAG    |
| Robinia pseudoacacia       | ---ATGTTTT | GGATCTCAAA | AGATACATGC | CACA-----  | -----CAG    |
| Lotus japonicus            | ---ATGACTT | GGATATCAGA | AGATACGTGG | CAGT-----  | -----CAG    |
| Vicia alpestris            | ATTCATTAGT | TGGGGGTCAG | AAAAACATAG | TTGTC----- | ----GTTTCAC |
| V. sativa                  | ATTCAGTAGT | TGGGGGTCAG | AAAAACTTGG | TTGTC----- | ----GTTTCAC |
| V. peregrina               | ATTCAGTAGT | TGGGGGTCAG | AAAAACTTGG | TTGTC----- | ----GTTTCAC |
| V. sepium                  | ATTCAGTAGT | TGGGGGTCAG | AAAAACTTGG | TTGTC----- | ----GTTTCAC |
| V. faba                    | ATTCATTAGT | TGGGGGTCAG | AAAAACTTGG | TTGTC----- | ----GTTTCAC |

|                      |            |            |            |            |             |
|----------------------|------------|------------|------------|------------|-------------|
| V.canescens          | ATTCATTAGT | TGGGGGTCAG | AAAAACATGG | TTGTC----- | -----GTTTCC |
| V.monantha           | ATTCATTAGT | TGGGGGTCAG | AAAAACATGG | TTGTC----- | -----GTTTCC |
| V.tetrasperma        | ATTCATTAGT | TGGGGGTCAG | AAAAACATGG | TTGTC----- | -----GTTTCC |
| V.narbonensis        | ATTCATTAGT | TGGGGGTCAG | AAAAACATGG | TTGTC----- | -----GTTTCC |
| Lens culinaris       | ATT-----   | --GGGGTCAG | AAAAACAAGG | TTGTC----- | -----GTTTCC |
| L.orientalis         | ATT-----   | --GGGGTCAG | AAAAACAAGG | TTTTT----- | -----GTTTCC |
| V.ervilia            | ATTCATTAGT | TGGGGGTCAG | AAAAACATAG | TTGTC----- | -----GTTTCC |
| Galega officinalis   | ATTCATTAGT | TGGGGGTCAG | AAAAACACGG | TTGTC----- | -----GTTTCC |
| Lathyrus palustris_K | -----CAAG  | AGGAGGGCAA | AAAAACACGG | TTTTTGTTC  | TATCTCTCAA  |
| L.palustris_H        | -----GAAT  | AGGAGGGCAA | AAAAACACGG | TTTTTGTTC  | TATCTCTCAA  |
| L.davidii            | -----CAAT  | AGGCGTGCAA | AAAAACACGG | TTTTTGTTC  | TATTTATCAA  |
| L.japonicus          | -----CAAG  | AGGAGGGCAA | AAAAACACGG | TTTTTGTTC  | TATCTGTCAA  |
| L.ochroleucus        | -----TAAG  | AGGAGGGCAA | AAAAACACGG | TTTTTGTTC  | TATAGGTCAA  |
| L.littoralis         | -----CAAG  | AGGAGGGAAA | AAAAACACGG | TTTTTGTTC  | TATCTATCAA  |
| L.venosus            | -----CAAG  | CGGAGGGCAA | AAAAACACGG | TTTTTGTTC  | CACATGTCAA  |
| L.graminifolius      | -----GAAG  | AGGAGGGCAA | AAAAACACGG | TTTTTGTTC  | TCTCTATCAA  |
| L.pubescens          | -----CAAC  | GGATGGGCAA | AAAAACGGGG | TCTTCGGTTC | TATATTTTCC  |
| L.sativus_KJ         | ATTCATTAAG | GACGAGACAA | ACAAAAAAGT | TTTATGTTC  | TATGTGTCC   |
| L.sativus_HM         | ATTCATTAAG | GACGAGACAA | ACAAAAAAGT | TTTATGTTC  | TATGTGTCC   |
| L.pseudocicera       | ATGCATTAAC | GACGAGACAA | AGAAAAAAGT | TTTGTGTTC  | TATGTCC     |
| L.chloranthus        | -----      | -----      | -----      | -----      | -----       |
| L.pratensis          | -----      | -----      | -----      | -----      | -----       |
| L.odoratus_HM        | -----      | -----      | -----      | -----      | -----       |
| L.odoratus_kJ        | -----      | -----      | -----      | -----      | -----       |
| L.hirsutus           | -----      | -----      | -----      | -----      | -----       |
| L.annuus             | -----      | -----      | -----      | -----      | -----       |
| L.cirrhusus          | CATAATTCGC | TGGGTGACAC | GCAAAGAAGT | GCTGGATTAT | TACGTCC     |
| L.latifolius         | CGTAATTCGC | TGGGTGACAC | GCAAAGAAGT | GCTGGATTAT | TACGTCC     |
| L.tingitanus         | -----      | -----      | -----      | -----      | -----       |
| Pisum sativum_H      | ---TAATATA | TAATATATAT | AGTAGTCCAA | TTTTTGTACG | ATGGGACTGT  |
| Pisum sativum_K      | ---TAATATA | TAATATATAT | AGTAGTCCAA | TTTTTGTACG | ATGGGACTGT  |
| Pisum sativum_HG     | ---TATATA  | TAATATATAT | AGTAGTCCAA | TTTTTGTACG | ATGGGACTGT  |
| Pisum fulvum         | ---TAATATA | TAATATATAT | AGTAGTCCAA | TTTTTGTACG | ATGGGACTGT  |
| Vavilovia formosa    | -----      | ---TATATAT | AGTAGTCAGA | TTTTTGTCCG | ATGGAACAT   |
| L.clymenum           | -----A     | TGGTGATTTT | TGCAGTCCTT | TCTTTATGGA | TTTGTGTTGA  |
| L.ochrus             | TTGAAAAATA | TGGTGGGTTT | TGCAGTCCTT | TCTTTATGGA | TTTGTGTTGA  |

|                                   |            |            |            |            |              |
|-----------------------------------|------------|------------|------------|------------|--------------|
| <i>Trifolium strictum</i>         | AAGACGCATG | GCTTGACATT | GTACCGGGGT | CCCAAAAAC  | AATCAATTTT   |
| <i>T. glanduliferum</i>           | AAGACGCATG | GCTTGACATT | GTACCGGGGT | CCCAAAAAC  | AATCAATTTT   |
| <i>T. boissieri</i>               | AAGACGCATG | GCTTGACATT | GTACCGGGGT | CCCAAAAAC  | AATCAATTTT   |
| <i>T. aureum</i>                  | AAGACGCATG | GCTTGACATT | GTACCGGGAT | CCCAAAAAC  | AATCAATTTT   |
| <i>T. meduseum</i>                | AAGACGCATG | GCTTGACATT | GTACCGGGGT | CCAAAAAAC  | AATCAATTTT   |
| <i>T. subterraneum</i>            | AAGACGCATG | GCTTGACATT | GTACCGGGGT | CCAAAAAAC  | AATCAATTTT   |
| <i>T. pratense</i>                | AAGACGCATG | GCTTGACATT | GTACCGGGGT | CCAAAAAAC  | AATCAATTTT   |
| <i>T. hybridum</i>                | AAGACGCGTG | GCTTGACATT | GTACCGGGGT | CCAAAAAAC  | TATCAATTTT   |
| <i>T. semipilosum</i>             | AAGACGCGTG | GCTTGACATT | GTACCGGGGT | CCAAAAAAC  | TATCAATTTT   |
| <i>T. occidentale</i>             | AAGACGCATG | GCTTGACATT | GTACCGGGGT | CCAAAAAAC  | AATCAATTTT   |
| <i>T. repens</i>                  | AAGACGCATG | GCTTGACATT | GTACCGGGGT | CCAAAAAAC  | AATCAATTTT   |
| <i>T. lupinaster</i>              | AAGACGCATG | GCTTGACATT | GTACCGGGGT | CCAAAAAAC  | AATCAATTTT   |
| <i>Cicer oxyodon</i>              | AAGACGCATG | GCTTGACATT | GTAACGGGGT | CCCAAAACC  | AATCAATTTT   |
| <i>C. chorrassanicum</i>          | AAGACGCATG | GCTTGACATT | GTAACGGGGT | CCCAAAACC  | AATCAATTTT   |
| <i>C. arietinum</i>               | AAGACGCATG | GCTTGACATT | GTAACAGGGT | CCCAAAACC  | GATCAATTTT   |
| <i>Medicago truncatula_KF</i>     | AAGACGCATG | GCTTGACATT | GTACCGGGGT | CCCAAAACC  | AATCAATTTT   |
| <i>M. truncatula_AC</i>           | AAGACGCATG | GCTTGACATT | GTACCGGGGT | CCCAAAACC  | AATCAATTTT   |
| <i>M. sativa_K</i>                | AAGACGCATG | GCTTGACATT | GTACCGGGGT | CCCAAAACC  | AATCAATTTT   |
| <i>M. sativa</i>                  | AAGACGCATG | GCTTGACATT | GTACCGGGGT | CCCAAAACC  | AATCAATTTT   |
| <i>M. papillosa</i>               | AAGACGCATG | GCTTGACATT | GTACCGGGGT | CCCAAAACC  | AATCAATTTT   |
| <i>M. hybrida</i>                 | AAGACGCATG | GCTTGACATT | GTACCGGGGT | CCCAAAACC  | AATCAATTTT   |
| <i>M. falcata</i>                 | AAGACGCATG | GCTTGACATT | GTACCGGGGT | CCCAAAACC  | AATCAATTTT   |
| <i>M. sativa_KU</i>               | AAGACGCATG | GCTTGACATT | GTACCGGGGT | CCCAAAACC  | AATCAATTTT   |
| <i>Melilotus albus</i>            | AAGACGCATG | GCTTGACATT | GTACCGGGGT | CCCAAAACC  | AATCAATTTT   |
| <i>Hedysarum formosum</i>         | AACACACATG | GATTTATACT | ATACCGGGG  | CACGAAAACC | AATTAATTTT   |
| <i>H. varium</i>                  | AACACACATG | GATTTATACT | ATACCGGGG  | CACGAAAACC | AATCAATTTT   |
| <i>H. singarense</i>              | AACACAGATG | GATTTATACT | ATACCGGGG  | CACGAAAACC | GACCAATTTT   |
| <i>H. minjanense</i>              | AACACACATG | GATTTACACT | ATACCGGGG  | CCCAAAACC  | AATCAATTTT   |
| <i>Tavrneria glabra</i>           | AACACACATG | GATTTACACT | ATACCGGGG  | CCCAAAACC  | AATCAATTTT   |
| <i>T. diffusa</i>                 | AACACACATG | GATTTACACT | ATACCGGGG  | CCCAAAACC  | AATCAATTTT   |
| <i>Greuteria membranacea</i>      | AACACACATG | GATTTACACT | ATACCGGGG  | CCCAAAACC  | AATCAATTTT   |
| <i>Corethroedendron scoparium</i> | AACACACATG | GATTTACACT | ATACCGGGG  | CCCAAAACC  | AATCAATTTT   |
| <i>Eversmannia subspinosa</i>     | AACACACATG | GATTTACACT | ATACCGGGG  | CCCAAAACC  | AATCAATTTT   |
| <i>Onobrychis bungei</i>          | AACACACATG | GATTTACACT | ATACCGGGG  | CCCAAAACC  | AATCAATTTT   |
| <i>O. cornuta</i>                 | AACACACATG | GATTTACACT | ATACCGGGG  | CCCAAAACC  | AATCAATTTT   |
| <i>O. michauxii</i>               | AACACACATG | GATTTACACT | ATACCGGGG  | CCCAAAACC  | AATCAATTTT   |
| <i>O. subacaulis</i>              | AACACACATG | GATTTACACT | ATACCGGGG  | CCCAAAACC  | AATCAATTTT   |
| <i>O. teheranica</i>              | AACACACATG | GATTTACACT | ATACCGGGG  | CCCAAAACC  | AATCAATTTT   |
| <i>Alhagi maurorum</i>            | AACACACATG | GATCTACACT | ATACCAGGGG | CCCAAAACC  | AATCAATTTT   |
| <i>Caragana microphylla</i>       | AACACACATG | GATCTACACT | ATACCAGGGG | CCCAAAACC  | AATCAATTTT   |
| <i>C. korshinski</i>              | AACACACATG | GATCTACACT | ATACCAGGGG | CCCAAAACC  | AATCAATTTT   |
| <i>C. kozlowii</i>                | AACACACATG | GATCTACACT | ATACCAGGGG | CCCAAAACC  | AATCAATTTT   |
| <i>C. rosea</i>                   | AACACACATG | GATCTACACT | ATACCAGGGG | CCCAAAACC  | AATCAATTTT   |
| <i>Tibetia liangshanensis</i>     | AAGACGCATG | GCTCTACACT | ATACCAGGGG | CCCAAAACC  | AATCAATTTT   |
| <i>Gueldenstaedtia verna</i>      | AAAACCCAGG | GCTCTACACT | ATACCAGGGG | CCCAAAACC  | AATCAATTTT   |
| <i>Halimodendron halodendron</i>  | AACCTCCCAC | CTTTTAAGTT | AACCCGGGG  | CCCAAAACC  | CAA - AACTTC |
| <i>Smirnowia turkestanica</i>     | AAGACGCATG | GCTCTACACT | GTACCAGGGG | CCCAAAACC  | AATCAATTTT   |
| <i>Eremosparton flaccidum</i>     | AAGACGCATG | GCTCTACACT | GTACCAGGGG | CCCAAAACC  | AATCAATTTT   |
| <i>Colutea persica</i>            | AAGACGCATG | GCTCTACACT | GTACCAGGGG | CCCAAAACC  | AATCAATTTT   |
| <i>C. triphylla</i>               | AAGACGCATG | GCTCTACACT | GGACCAGGGG | CCCAAAACC  | AATTTATTTT   |
| <i>Sphaerophylla salsula</i>      | AAGACGCATG | GCTCTACACT | GTACCAGGGG | CCCAAAACC  | AATCAATTTT   |
| <i>Podlechiya vogelii</i>         | AAGACGCATG | GCTCTACACT | GTACCAGGGG | CCCAAAACC  | AATCAATTTT   |
| <i>Carmichaelia australis</i>     | AAGACGCATG | GCTCTACACT | GTACCAGGGG | CCCAAAACC  | AATCAATTTT   |
| <i>Sutherlandia frutescens</i>    | AAGACGCATG | GCTCTACACT | GTACCAGGGG | CCCAAAACC  | AATCAATTTT   |
| <i>Astragalus membranaceus</i>    | AAGACGCATG | GCTCTACACT | GTACCAGGGG | CTCGAAAACC | AATCAATTTT   |
| <i>A. mongholicus</i>             | AAGACGCATG | GCTCTACACT | GTACCAGGGG | CTCGAAAACC | AATCAATTTT   |
| <i>A. nakaianus</i>               | AAGACGCATG | GCTCTACACT | GTACCAGGGG | CTCGAAAACC | AATCAATTTT   |
| <i>A. macropelmatus</i>           | AAGACGCATG | GCTCTACACT | GTACCAGGGG | CCCAAAACC  | AATAAATTTT   |
| <i>A. iranicus</i>                | AAGACGCATG | GCTCTACACT | GTACCAGGGG | CCCAAAACC  | AATCAATTTT   |
| <i>A. denudatus</i>               | AAGACGCATG | GCTCTACACT | GTACCAGGGG | CCCAAAACC  | AATCAATTTT   |
| <i>A. odoratus</i>                | AAGACGCATG | GCTCTACACT | GTACCAGGGG | CCCAAAACC  | AATCAATTTT   |
| <i>Oxytropis szovitsii</i>        | AAGACGCATG | GCTCTACACT | GTACCAGGGG | CCCAAAACC  | AATCAATTTT   |
| <i>O. iranica</i>                 | AAGACGCATG | GCTCTACACT | GTACCAGGGG | CCCAAAACC  | AATCAATTTT   |
| <i>O. kotschyana</i>              | AAGACGCATG | GCTCTACACT | GTACCAGGGG | CCCAAAACC  | AATCAATTTT   |
| <i>Erophaca baetica</i>           | AAGATGCATG | GCTCTACACT | GTACCAGGGG | CCCAAAACC  | TATCAATTTT   |
| <i>Wisteria floribunda</i>        | AAGACGGATG | GATCGACTTT | GTAAGGGGGT | GTCGAAAACC | AAGCGATTTT   |
| <i>W. sinensis</i>                | AAGACGGATG | GATCGACTTT | GTAAGGGGGT | GTCGAAAACC | AAGCGATTTT   |
| <i>Glycyrrhiza lepidota</i>       | AAGACGCATG | GATCGACATT | GTAACGGGGT | CTCGAAAACC | AAGCGATTTT   |
| <i>G. uralensis</i>               | AAGACGCATG | GATCGACATT | GTAACGGGGT | CTCGAAAACC | AAGCGATTTT   |
| <i>G. glabra</i>                  | AAGACGCATG | GATCGACATT | GTAACGGGGT | CTCGAAAACC | AAGCGATTTT   |
| <i>Meristotropis xathioides</i>   | AAGACGCATG | GATCGACATT | GTAACGGGGT | CTCGAAAACC | AAGCGATTTT   |
| <i>Robinia pseudoacacia</i>       | AAGAAATACG | GGTAGATTTT | GTAACAGGGT | GTCGAAAACC | GATTTGATTTT  |
| <i>Lotus japonicus</i>            | AAGAAGTACG | AGTAGATTTT | GTAACGGGGT | GTCGAAAACC | CCGTGATTTT   |
| <i>Vicia alpestris</i>            | AAGACCCATC | GCTTGACATT | GTCCAGGGGT | CCCAAAAAT  | TATCTATTTT   |
| <i>V. sativa</i>                  | AAGACGCATG | GCTTGACATT | GTACCGGGGT | CCCTAAAAAT | TATCAATTTT   |
| <i>V. peregrina</i>               | AAGACGCATG | GCTTGACATT | GTACCGGGGT | CCCTAAAAAT | TATCAATTTT   |
| <i>V. sepium</i>                  | AAGACGCATG | GCTTGACATT | GTACCGGGGT | CCCTAAAAAT | TATCAATTTT   |
| <i>V. faba</i>                    | AAGACGCATG | GCTTGACATT | GTACCGGGGT | CCCAAAAAT  | TATCAATTTT   |

|                      |            |            |            |             |             |
|----------------------|------------|------------|------------|-------------|-------------|
| V.canescens          | AAGACGCATG | GCTTGACATT | GTACCGGGGT | CCCGAAAAAT  | TATCAATTTTC |
| V.monantha           | AAGACGCCTG | GCTTGACATT | GTACCGGGGT | CCCGAAAAAT  | TATCAATTTTA |
| V.tetrasperma        | AAGTAGCATG | GCTTGACATT | GTCCCGGGGT | CCCGAAAAAT  | TATCAATTTTA |
| V.narbonensis        | AAGACGCATG | GCTTGACATT | GTACCGGGGT | CCCGAAAAAT  | TATCAATTTT  |
| Lens culinaris       | AAGACGCATG | GCTTGACATT | GTACCGGGGT | CCAAAAAAAT  | TATCAATTTTC |
| L.orientalis         | AAGACGCATG | GCTTGACATT | GTACCGGGGT | CCAAAAAAAT  | TATCAATTTT  |
| V.ervilia            | AAGACGCATG | GCTTGACATT | GTACCGGGGT | CCCGAAAAAC  | TATCAATTTTC |
| Galega officinalis   | AAGACGCATG | GCTTGACATT | GTACCGGGGT | CCCGAAAAATC | AATCAATATC  |
| Lathyrus palustris_K | ACGACATCTG | GCTCGATACT | ATACCTGGAT | CCAGAAATGG  | TACGATTTTT  |
| L.palustris_H        | ACGACATTTG | GGTGGATAGT | ATACCAGGAT | CCAGAAATGG  | GACGATTCTT  |
| L.davidii            | ACGACATATG | GGTAGATGAT | ATCCCTGGGT | CCAGAAATGG  | TACCATTTTT  |
| L.japonicus          | AGGACATCTG | GATTGATACG | ATCCCTGGGT | CCAGAAATGG  | GACGATTCTT  |
| L.ochroleucus        | ACAGCATATG | GGTAGACACT | ATACCTGGGT | CCAGAAATGG  | CACGATTCTT  |
| L.littoralis         | AGGACATCTG | GTTTGATACT | ATCCCTGGGT | CCAGAAATGG  | TACGATTTTTG |
| L.venosus            | AAAACGTATG | GATCGATACT | ATACCTGGAT | CGAGAAATGC  | TACGATTCTT  |
| L.graminifolius      | AGGACATCTG | GATCGATATT | ATCCCCGGAT | CCAGAAATGG  | TACGATTCTT  |
| L.pubescens          | AAGATATATG | GATTGACACG | ATACCTGGGT | CTCGAAATGG  | TAACATTTT   |
| L.sativus_KJ         | AAACTACTTG | GATGGACACT | ATCCCGGGTT | TCCAACACGT  | TTTTTTTCGA  |
| L.sativus_HM         | AAACTACTTG | GATGGACACT | ATCCCGGGTT | TCCAACACGT  | TTTTTTTCGA  |
| L.pseudocicera       | AAAATACTTG | GATGGACACT | ATCCCGGGTT | TCCAACATGT  | GACTTTTAGA  |
| L.chloranthus        | -----      | -----      | -----      | -----       | -----       |
| L.pratensis          | -----      | -----      | -----      | -----       | -----       |
| L.odoratus_HM        | -----      | -----      | -----      | -----       | -----       |
| L.odoratus_kJ        | -----      | -----      | -----      | -----       | -----       |
| L.hirsutus           | -----      | -----      | -----      | -----       | -----       |
| L.annuus             | -----      | -----      | -----      | -----       | -----       |
| L.cirrhosus          | AAGACATTTG | GATTGACACT | ATCCCGGGTT | TCCGAAATGT  | TTGGTTTCTC  |
| L.latifolius         | AAGACATTTG | GATTGACACT | ATCCCGGGTT | TCCGAAATGT  | TTGGTTTCTC  |
| L.tingitanus         | -----      | -----      | -----      | -----       | -----       |
| Pisum sativum_H      | AGAGGGTATT | ATAGTAACTG | TTTTATCGCT | TGTTTTTGCT  | AGAAAATTAA  |
| Pisum sativum_K      | AGAGGGTATT | ATAGTAACTG | TTTTATCGCT | TGTTTTTGCT  | AGAAAATTAA  |
| Pisum sativum_HG     | AGAGGGTATT | ATAGTAACTG | TTTTATCGCT | TGTTTTTGCT  | AGAAAATTAA  |
| Pisum fulvum         | AGAGGGTATT | ATAGTAACTG | TTTTATCGCT | TGTTTTTGCT  | AGAAAATTAA  |
| Vavilovia formosa    | AACGTGTATT | ATAGTCACTG | GTTTATGGCT | CGTTTTTCCT  | ACAAAATTAA  |
| L.clymenum           | AAAAGTCATT | C--GTCGCTT | GTCAAAAAAC | CGAGGTTTTTC | GTTTCATATCT |
| L.ochrus             | AAAAGTCATT | C--GTCGCTT | GTCAAAAAAC | CGAGGTTTTTC | GTTTCATATCT |

|                                   |            |            |            |            |             |
|-----------------------------------|------------|------------|------------|------------|-------------|
| <i>Trifolium strictum</i>         | TTCTGGGCTT | CTTTCACTCT | TTTAGGTTCA | TTAGGGGTGT | TATATATTTT  |
| <i>T. glanduliferum</i>           | TTCTGGGCTT | CTTTCACTCT | TTTAGGTTCA | TTAGGGGTGT | TATATATTTT  |
| <i>T. boissieri</i>               | TTCTGGGCTT | CTTTCACTCT | TTTAGGTTCA | TTAGGGGTGT | TATATATTTT  |
| <i>T. aureum</i>                  | TTCTGGGCTT | CTTTCACTCT | TTTAGGTTCA | TTAGGGGTGT | TATATATTTT  |
| <i>T. meduseum</i>                | TTCTGGGCTT | CTTTCACTCT | TTTAGGTTCA | TTAGGGGTGT | TATATATTTT  |
| <i>T. subterraneum</i>            | TTCTGGGCTT | CTTTCACTCT | TTTAGGTTCA | TTAGGGGTGT | TATATATTTT  |
| <i>T. pratense</i>                | TTCTGGGCTT | CTTTCACTCT | TTTAGGTTCA | TTAGGGGTGT | TATATATTTT  |
| <i>T. hybridum</i>                | TTCTGGGCTT | CTTTCACTCT | TTTAGGTTCA | TTAGGGGTCT | TATATATTTT  |
| <i>T. semipilosum</i>             | TTCTGGGCTT | CTTTCACTCT | TTTAGGTTCA | TTAGGGGTCT | TATATATTTT  |
| <i>T. occidentale</i>             | TTCTGGGCTT | CTTTCACTCT | TTTAGGTTCA | TTAGGGGTGT | TATATATTTT  |
| <i>T. repens</i>                  | TTCTGGGCTT | CTTTCACTCT | TTTAGGTTCA | TTAGGGGTGT | TATATATTTT  |
| <i>T. lupinaster</i>              | TTCTGGGCTT | CTTTCACTCT | TTTAGGTTCA | TTAGGGGTGT | TATATATTTT  |
| <i>Cicer oxyodon</i>              | TTCTGGGCTT | CTTTCACTCT | TTTAGGTTCA | TTAGGAGTGT | TATATATTTT  |
| <i>C. chorrassanicum</i>          | TTCTGGGCTT | CTTTCACTCT | TTTAGGTTCA | TTAGGGGTGT | TATATATTTT  |
| <i>C. arietinum</i>               | TTCTGGGCTT | CTTTCACTCT | TTTAGGTTCA | TTAGGAGTGT | TATATATTTT  |
| <i>Medicago truncatula_KF</i>     | TTCTGGGCTT | CTTTCACTCT | TTTAGGTTCA | TTAGGGGTGT | TATATCTTTT  |
| <i>M. truncatula_AC</i>           | TTCTGGGCTT | CTTTCACTCT | TTTAGGTTCA | TTAGGGGTGT | TATATCTTTT  |
| <i>M. sativa_K</i>                | TTCTGGGCTT | CTTTCACTCT | TTTAGGTTCA | TTAGGGGTGT | TATATATTTT  |
| <i>M. sativa</i>                  | TTCTGGGCTT | CTTTCACTCT | TTTAGGTTCA | TTAGGGGTGT | TATATATTTT  |
| <i>M. papillosa</i>               | TTCTGGGCTT | CTTTCACTCT | TTTAGGTTCA | TTAGGGGTGT | TATATATTTT  |
| <i>M. hybrida</i>                 | TTCTGGGCTT | CTTTCACTCT | TTTAGGTTCA | TTAGGGGTGT | TATATATTTT  |
| <i>M. falcata</i>                 | TTCTGGGCTT | CTTTCACTCT | TTTAGGTTCA | TTAGGGGTGT | TATATATTTT  |
| <i>M. sativa_KU</i>               | TTCTGGGCTT | CTTTCACTCT | TTTAGGTTCA | TTAGGGGTGT | TATATATTTT  |
| <i>Melilotus albus</i>            | TTCTGGGCTT | CTTTCACTCT | TTTAGGTTCA | TTAGGGGTAT | TATATATTTT  |
| <i>Hedysarum formosum</i>         | TTCTGGGCTT | CTTTCACTCT | TTTAGGTTCA | TTAGGGGTTT | TATTTATTTT  |
| <i>H. varium</i>                  | TTCTGGGCTT | CTTTCACTCT | TTTAGGTTCA | TTAGGGGTTT | TATTTATTTT  |
| <i>H. singarense</i>              | TTCTGGGCTT | CTTTCACTCT | TTTAGGTTCA | TTAGGGGTTT | TATTTATTTT  |
| <i>H. minjanense</i>              | TTCTGGGCTT | CTTTCACTCT | TTTAGGTTCA | TTAGGGGTTT | TATTTATTTT  |
| <i>Tavrneria glabra</i>           | TTCTGGGCTT | CTTTCACTCT | TTTAGGTTCA | TTAGGGGTTT | TATTTATTTT  |
| <i>T. diffusa</i>                 | TTCTGGGCTT | CTTTCACTCT | TTTAGGTTCA | TTAGGGGTTT | TATTTATTTT  |
| <i>Greuteria membranacea</i>      | TTCTGGGCTT | CTTTCACTCT | TTTAGGTTCA | TTAGGGGTTT | TATTTATTTT  |
| <i>Corethroedendron scoparium</i> | TTCTGGGCTT | CTTTCACTCT | TTTAGGTTCA | TTAGGGGTTT | TATTTATTTT  |
| <i>Eversmannia subspinosa</i>     | TTCTGGGCTT | CTTTCACTCT | TTTAGGTTCA | TTAGGGGTTT | TATTTATTTT  |
| <i>Onobrychis bungei</i>          | TTCTGGGCTT | CTTTCACTCT | TTTAGGTTCA | TTAGGGGTTT | ATTTTATTTT  |
| <i>O. cornuta</i>                 | TTCTGGGCTT | CTTTCACTCT | TTTAGGTTCA | TTAGGGGTTT | TATTTATTTT  |
| <i>O. michauxii</i>               | TTCTGGGCTT | CTTTCACTCT | TTTAGGTTCA | TTAGGGGTTT | TATTTATTTT  |
| <i>O. subacaulis</i>              | TTCTGGGCTT | CTTTCACTCT | TTTAGGTTCA | TTAGGGGTTT | TATTTATTTT  |
| <i>O. teheranica</i>              | TTCTGGGCTT | CTTTCACTCT | TTTAGGTTCA | TTAGGGGTTT | TATTTATTTT  |
| <i>Alhagi maurorum</i>            | TTCTGGGCTT | CTTTCACTCT | TTTAGGTTCA | TTAGGGGTGT | TATTTATTTT  |
| <i>Caragana microphylla</i>       | TTCTGGGCTT | CTTTCACTCT | TTTAGGTTCA | TTAGGGGTGT | TATTTATTTT  |
| <i>C. korshinski</i>              | TTCTGGGCTT | CTTTCACTCT | TTTAGGTTCA | TTAGGGGTGT | TATTTATTTT  |
| <i>C. kozlowii</i>                | TTCTGGGCTT | CTTTCACTCT | TTTAGGTTCA | TTAGGGGTGT | TATTTATTTT  |
| <i>C. rosea</i>                   | TTCTGGGCTT | CTTTCACTCT | TTTAGGTTCA | TTAGGGGTTT | TATTTATTTT  |
| <i>Tibetia liangshanensis</i>     | TTCTGGGCTT | CTTTCACTCT | TTTAGGTTCA | TTAGGGGTGT | TATTTATTGC  |
| <i>Gueldenstaedtia verna</i>      | TTCTGGGCTT | CTTTCACTCT | TTTAGGTTCA | TTAGGGGTGT | TATTTATTGC  |
| <i>Halimodendron halodendron</i>  | TTCTAGGCCT | CTTCCGTTTT | ATT-GTTACG | GAGGGGGGGG | CAATTTGTTA- |
| <i>Smirnowia turkestanica</i>     | TTCTGGGCTT | CTTTCACTCT | TTTAGGTTCA | TTAGGGGTTT | TAGTTATTTT  |
| <i>Eremosparton flaccidum</i>     | TTCTGGGCTT | CTTTCACTCT | TTTAGGTTCA | TTAGGGGTTT | TAGTTATTTT  |
| <i>Colutea persica</i>            | TTCTGGGCTT | CTTTCACTCT | TTTAGGTTCA | TTAGGGGTTT | TAGTTATTTT  |
| <i>C. triphylla</i>               | TTCTGGGCTT | CTTTCACTCT | TTTAGGTTCA | TTAGGGGTTT | TAGTTATCTC  |
| <i>Sphaerophylla salsula</i>      | TTCTGGGCTT | CTTTCACTCT | TTTAGGTTCA | TTAGGGGTTT | TAGTTATTTT  |
| <i>Podlechiella vogelii</i>       | TTCTGGGCTT | CTTTCACTCT | TTTAGGTTCA | TTAGGGGTTT | TAGTTATTTT  |
| <i>Carmichaelia australis</i>     | TTCTGGGCTT | CTTTCACTCT | TTTAGGTTCA | TTAGGGGTTT | TAGTTATTTT  |
| <i>Sutherlandia frutescens</i>    | TTCTGGGCTT | CTTTCACTCT | TTTAGGTTCA | TTAGGAGTTT | TAGTTATTTT  |
| <i>Astragalus membranaceus</i>    | TTCTGGGCTT | CTTTCACTCT | TTTAGGTTCA | TTAGGGGTTT | TAGTTATTTT  |
| <i>A. mongholicus</i>             | TTCTGGGCTT | CTTTCACTCT | TTTAGGTTCA | TTAGGGGTTT | TAGTTATTTT  |
| <i>A. nakaianus</i>               | TTCTGGGCTT | CTTTCACTCT | TTTAGGTTCA | TTAGGGGTTT | TAGTTATTTT  |
| <i>A. macropelmatus</i>           | TTCTGGGCTT | CTTTCACCCT | TTTAGGTTCA | TTAGGGGTTT | TAGTTATTTT  |
| <i>A. iranicus</i>                | TTTTGGGCTT | CTTTCACTCT | TTTAGGTTCA | TTAGGGGTTT | TAGTTATTTT  |
| <i>A. denudatus</i>               | TTCTGGGCTT | CTTTCACTCT | TTTAGGTTCT | TTAGGGGTTT | TAGTAATTTT  |
| <i>A. odoratus</i>                | TTCTGGGCTT | CTTTCACTCT | TTTAGGTTCA | TTAGGGGTTT | TAGTTATTTT  |
| <i>Oxytropis szovitsii</i>        | TTCTGGGCTT | CTTTCACTCT | TTTAGGTTCA | TTAGGGGTTT | TAGTTGTTTT  |
| <i>O. iranica</i>                 | TTCTGGGCTT | CTTTCACTCT | TTTAGGTTCA | TTAGGGGTTT | TAGTTGTTTT  |
| <i>O. kotschyana</i>              | TTCTGGGCTT | CTTTCACTCT | TTTAGGTTCA | TTAGGGGTTT | TAGTTATTTT  |
| <i>Erophaca baetica</i>           | TTCTGGGCTT | CTTTCACCCT | TTTAGGTTCA | TTAGGGGTTT | TATTTATTTT  |
| <i>Wisteria floribunda</i>        | TTCTGGGCTT | CTTTCATTCT | TTTAGGTTCA | TTAGGGGTGT | TATTTGATTTT |
| <i>W. sinensis</i>                | TTCTGGGCTT | CTTTCATTCT | TTTAGGTTCA | TTAGGGGTGT | TATTTGATTTT |
| <i>Glycyrrhiza lepidota</i>       | TTCTGGGCTT | CTTTCATTCT | TTTAGGTTCA | TTAGGGGTTT | TATTTGATTTT |
| <i>G. uralensis</i>               | TTCTGGGCTT | CTTTCATTCT | TTTAGGTTCA | TTAGGGGTTT | TATTTGATTTT |
| <i>G. glabra</i>                  | TTCTGGGCTT | CTTTCATTCT | TTTAGGTTCA | TTAGGGGTTT | TATTTGATTTT |
| <i>Meristotropis xathioides</i>   | TTCTGGGCTT | CTTTCATTCT | TTTAGGTTCA | TTAGGGGTTT | TATTTGATTTT |
| <i>Robinia pseudoacacia</i>       | TTCTCGGCCT | CTATCAGTCT | TTTTGGTTCA | TTAGGGGGTT | TATTTGGTTGC |
| <i>Lotus japonicus</i>            | TTCTGGGCAT | TTATCACTCT | TTTAGGTTCA | GTAGGGTTTT | TATTTGGTTGC |
| <i>Vicia alpestris</i>            | TTCTGGGCTT | CTTTCACTCT | TTTAGGTTCC | TTAGGGGGTG | TATATTTTTT  |
| <i>V. sativa</i>                  | TTCTGGGCTT | CTTTCACTCT | TTTAGGTTCA | TTAGGGGTTT | TATATATTTT  |
| <i>V. peregrina</i>               | TTCTGGGCTT | CTTTCACTCT | TTTAGGTTCA | TTAGGGGTTT | TATATATTTT  |
| <i>V. sepium</i>                  | TTCTGGGCTT | CTTTCACTCT | TTTAGGTTCA | TTAGGGGTTT | TATATATTTT  |
| <i>V. faba</i>                    | TTCTGGGCTT | CTTTCACTCT | TTTAGGTTCA | TTAGGAGTTT | TATATATTTT  |

|                      |             |             |             |            |            |
|----------------------|-------------|-------------|-------------|------------|------------|
| V.canescens          | TTCTGGGCTT  | CTTTCACTCT  | TTTAGGTTCA  | TTGGGGGTTT | TATCTATTTT |
| V.monantha           | TTCTGGGCTT  | CTTTCACTCT  | TTTAGGTTCA  | TTAGGGGTTT | TATATATTTT |
| V.tetrasperma        | CTCTGGGCTT  | CTTTCACTCT  | TTTAGGTTCA  | TTAGGGGTTT | TATATACTTC |
| V.narbonensis        | TTCTGGGCTT  | CTTTCACTCT  | TTTAGGTTCA  | TTAGGGGTTT | TATATATTTT |
| Lens culinaris       | TTCTGGGCTT  | CTTTCACTCT  | TTTAGGGTCA  | TTAGGGGTTT | TATATATTTT |
| L.orientalis         | TTTTGGGCTT  | CTTTCACTCT  | TTTAGGGTCA  | TTAGGGGTTT | TATATATTTT |
| V.ervilia            | TTCTGGGCTT  | CTTTCACTCT  | TTTAGGTTCA  | TTAGGGGTTT | TATATATTTT |
| Galega officinalis   | TTCTGGGCTT  | CTTTCATTCT  | TTTAGGTTCA  | TTAGGGGTAT | TATATATTTT |
| Lathyrus palustris_K | TTGTTTTCGT  | ACTTTAATTT  | CTCTCAAACA  | ATCGAAGGAG | TATGCCGTTT |
| L.palustris_H        | TTATTTTTCGT | ACTTTAATTT  | CTATCAAACA  | ATCGAAGGAG | TATGTCGTTT |
| L.davidii            | TTATTTTTCGT | ACTTTAATTT  | CCTTCAAACG  | ATAGAAGGAA | TATGCCGTTT |
| L.japonicus          | TTATTTTTCTT | ACTTTAATTT  | CTATCAAACA  | ATTGAAGGAA | TATGCCGTTT |
| L.ochroleucus        | TTGTTTTCGT  | ACTTACATTT  | CTATCAAACA  | ATCGAAGGAA | TATCCCCTTT |
| L.littoralis         | TTATTTTTCTT | ACTTTAATTT  | CTATCAAACA  | ATTGAAGGAA | TATGCCGTTT |
| L.venosus            | TTATTTTTCTT | ACTTCAATTT  | CTCTCAAACA  | ATCGAAGGAG | TATCCCCTTT |
| L.graminifolius      | TTATTTTTCTT | ATTTAAATTT  | CTCGCTAACA  | CTAGAGGGAG | TATCCCCTTT |
| L.pubescens          | TTATTTGCCG  | TTTTTCGGTTT | CTATAAGTTC  | ATCGAGTTAG | GATACCAGGG |
| L.sativus_KJ         | ATTTTAAGTC  | ATGTCAGTTT  | TTTCGTGGGA  | TTCTTTTCTC | TCTATCGTTT |
| L.sativus_HM         | ATTTTAAGTC  | ATGTCAGTTT  | TTTCGTGGGA  | TTCTTTTCTC | TCTATCGTTT |
| L.pseudocicera       | ATCTTGAGTC  | ATGTGAGTTT  | TTTCATGGGA  | TTCTTTGCTC | TCTATCGTTT |
| L.chloranthus        | -----       | -----       | -----       | -----      | -----      |
| L.pratensis          | -----       | -----       | -----       | -----      | -----      |
| L.odoratus_HM        | -----       | -----       | -----       | -----      | -----      |
| L.odoratus_kJ        | -----       | -----       | -----       | -----      | -----      |
| L.hirsutus           | -----       | -----       | -----       | -----      | -----      |
| L.annuus             | -----       | -----       | -----       | -----      | -----      |
| L.cirrhosus          | GTGTGTTCTT  | ATCTCAATTT  | TTATTTTCGGG | TTAGATTCTC | TATCTCGTTT |
| L.latifolius         | TTGTGTTCTT  | ATCTCAATTT  | TTCTTTAGGG  | TTGATTCTC  | TATATCGTTT |
| L.tingitanus         | -----       | -----       | -----       | -----      | -----      |
| Pisum sativum_H      | TTTGTGGGC   | AGAAGGTCTT  | CCTGCATATC  | GTTTAGAAGA | CTCATGGATT |
| Pisum sativum_K      | TTTGTGGGC   | AGAAGGTCTT  | CCTGCATATC  | GTTTAGAAGA | CTCATGGATT |
| Pisum sativum_HG     | TTTGTAGGC   | AGAAGGTCTT  | CCTGCATATC  | GTTTAGAAGA | CTCATGGATT |
| Pisum fulvum         | TTTGTGGGC   | AGAAGGTCTT  | CCTGCATATC  | GTTTAGAAGA | CTCATGGATT |
| Vavilovia formosa    | TT-----     | -----       | -----       | -----      | -----      |
| L.clymenum           | TTCAGAAAAC  | GTATGGATTG  | ACAGTATACC  | GGGGTCCCGA | AACAGTACCA |
| L.ochrus             | TTCAGAAAAC  | GCATGGATTG  | ACAGAATACC  | GGGGTCCCGA | AACAGTACCA |

|                                   |            |            |              |             |             |
|-----------------------------------|------------|------------|--------------|-------------|-------------|
| <i>Trifolium strictum</i>         | CGTTTCCAGT | TATTATGGTA | GGCATTFFFFFF | CTCTTTTCATT | TCGTCCGAAT  |
| <i>T. glanduliferum</i>           | CGTTTCCAGT | TATTATGGTA | GGCATTFFFFFF | CTCTTTTCATT | TCATCCGA--  |
| <i>T. boissieri</i>               | CGTTTCCAGT | TATTATGGTA | GGCATTFFFFFF | CTCTTTTCATT | TCGTCCGAAT  |
| <i>T. aureum</i>                  | CGTTTCCAGT | TATTATGGTA | GGCATTFFFFFF | CTCTTTTCATT | TCGTCCGATT  |
| <i>T.meduseum</i>                 | CGTTTCCAGT | TATTATGGTA | GGCATTFFFFFF | CTCTTTTCATT | TCGTCCGAAT  |
| <i>T.subterraneum</i>             | CGTTTCCAGT | TATTATGGTA | GGCATTFFFFFF | CTCTTTTCATT | TCGTCCGAAT  |
| <i>T.pratense</i>                 | CGTTTCCAGT | TATTATGGTA | GGCATTFFFFFF | CTCTTTTCATT | TCGTCCGAAT  |
| <i>T.hybridum</i>                 | CGTTTCCAGT | TACTACGGTA | GGCATTFFFFFF | CTCTTTTCATT | TCGTCCGAAT  |
| <i>T.semipilosum</i>              | CGTTTCCAGT | TACTATGGTA | GGCATTFFFFFF | CTCTTTTCATT | TCGTCCGAAT  |
| <i>T.occidentale</i>              | CGTTTCCAGT | TACTATGGTA | GGCATTFFFFFF | CTCTTTTCATT | TCGTCCGAAT  |
| <i>T.repens</i>                   | CGTTTCCAGT | TACTATGGTA | GGCATTFFFFFF | CTCTTTTCATT | TCGTCCGAAT  |
| <i>T.lupinaster</i>               | CGTTTCCAGT | TATTATGGTA | GGCATTFFFFFF | CTCTTTTCATT | TCGTCCGAAT  |
| <i>Cicer oxyodon</i>              | AGTTTCTAGT | TATTATGGTA | GGCATTFFFFFF | CTCTTTTCATT | TCGTCCGAAT  |
| <i>C. chorrassanicum</i>          | AGTTTCTAGT | TATTATGGTA | GGCATTFFFFFF | CTCTTTTCATT | TCGTCCGAAT  |
| <i>C. arietinum</i>               | AGTTTCTAGT | TATTATGGTA | GGCAGTFFFFFF | CTCTTTTCATT | TCGTCCGAAT  |
| <i>Medicago truncatula_KF</i>     | AGTTTCCAGT | TATTATGGTA | GACATTTTTTT  | CTCTTTGATT  | TCATCTGAAT  |
| <i>M.truncatula_AC</i>            | AGTTTCCAGT | TATTATGGTA | GACATTTTTTT  | CTCTTTGATT  | TCATCTGAAT  |
| <i>M.satava_K</i>                 | AGTTTCCAGT | TATTATGGTA | GACATTTTTTT  | CTCTTTGATT  | TCATCTGAAT  |
| <i>M.satava</i>                   | AGTTTCCAGT | TATTATGGTA | GACATTTTTTT  | CTCTTTGATT  | TCATCTGAAT  |
| <i>M.papillosa</i>                | AGTTTCCAGT | TATTATGGTA | GACATTTTTTT  | CTCTTTGATT  | TCATCTGAAT  |
| <i>M.hybrida</i>                  | AGTTTCCAGT | TATTATGGTA | GACATTTTTTT  | CTCTTTGATT  | TCATCTGAAT  |
| <i>M.falcata</i>                  | AGTTTCCAGT | TATTATGGTA | GACATTTTTTT  | CTCTTTGATT  | TCATCTGAAT  |
| <i>M.satava_KU</i>                | AGTTTCCAGT | TATTATGGTA | GACATTTTTTT  | CTCTTTGATT  | TCATCTGAAT  |
| <i>Melilotus albus</i>            | CGTTTCCAGT | TATTATGGTA | GACATTTTTTT  | CTCTTTTCATT | TCATCCGAAT  |
| <i>Hedysarum formosum</i>         | AGCTTCCAGT | TATTATGGTA | GTAATTTTTTT  | C-----AAT   | TCGTCCGAAT  |
| <i>H.varium</i>                   | AGCTTCCAGT | TATTATGGTA | GTAATTTTTTT  | C-----AAT   | TCGTCCGAAT  |
| <i>H.singarense</i>               | AGCTACCAGT | TATTATGGTA | GTAATTTTTTT  | C-----AAT   | CCGTCCGAAT  |
| <i>H.minjanense</i>               | AGCTTCCAGT | TATTATGGTA | GTCATTTTTTT  | C-----AAT   | TCGTCCGAAT  |
| <i>Tavrneria glabra</i>           | AGCTTCCAGT | TATTATGGTA | GTAATTTTTTT  | C-----AAT   | TCGTCCGAAT  |
| <i>T.diffusa</i>                  | AGCTTCCAGT | TATTATGGTA | GTAATTTTTTT  | C-----AAT   | TCGTCCGAAT  |
| <i>Greuteria membranacea</i>      | AGCTTCTAGT | TATTATGGTA | GTAATTTTTTT  | C-----AAT   | TCGTCCGAAT  |
| <i>Corethroedendron scoparium</i> | AGCTTCTAGT | TATTATGGTA | GTAATTTTTTT  | C-----AAT   | TCGTCCGAAT  |
| <i>Eversmannia subspinosa</i>     | AGCTTCTAGT | TATTATGGTA | ATAATTTTTTT  | C-----AAT   | TCGTCCGAAT  |
| <i>Onobrychis bungei</i>          | AGCTTCCAGT | TATTATGGTA | GTAATTTTTTT  | C-----AAT   | TCGTCCGAAT  |
| <i>O.cornuta</i>                  | AGCTTCCAGT | TATTATGGTA | GTAATTTTTTT  | C-----AAT   | TCGTCCGAAT  |
| <i>O.michauxii</i>                | AGCTTCCAGT | TATTATGGTA | GTAATTTTTTT  | C-----AAT   | TCGTCTGAAT  |
| <i>O.subacaulis</i>               | AGCTTCCAGT | TATTATGGTA | GTAATTTTTTT  | C-----AAT   | TCGTCCGAAT  |
| <i>O.teheranica</i>               | AGCTTCCAGT | TATTATGGAA | GTAATTTTTTT  | C-----AAT   | TCGTCCGAAT  |
| <i>Alhagi maurorum</i>            | AGCTTCTAGT | TATTATGGTA | GCAATTTTTTT  | C-----AAT   | TCGTCCGAAT  |
| <i>Caragana microphylla</i>       | AGCTTCCAGT | TTTTATGGTA | GGAATTTTTTT  | CTCTTTCAAT  | TCGTCCGAAT  |
| <i>C.korshinski</i>               | AGCTTCCAGT | TTTTATGGTA | GGAATTTTTTT  | CTCTTTCAAT  | TCGTCCGAAT  |
| <i>C.kozlowii</i>                 | AGCTTCCAGT | TTTTATGGTA | GGAATTTTTTT  | CTCTTTCAAT  | TCGGACGAAT  |
| <i>C.rosea</i>                    | AGCTTCCAGT | TTTTATGGTA | GGAATTTTTTT  | CTCTTTCAAT  | TCGTCCGAAT  |
| <i>Tibetia liangshanensis</i>     | AGCTTCCAGT | TATTTTGGTA | GGAATTTTTTT  | CTCTTTTAAAT | TCGTCCGACT  |
| <i>Gueldenstaedtia verna</i>      | AGCTTCCAGT | TATTTTGGTA | GGAATTTTTTT  | CTCTTTGAAAT | TCGTCCGACT  |
| <i>Halimodendron halodendron</i>  | GGGTCCAGT  | CTTTATGGAA | GAAATATTTTA  | T--CTTCTAT  | TGTTTGGAAAT |
| <i>Smirnowia turkestanica</i>     | AGCTTCCAGT | TATTATGGTC | GGAATTTTTTT  | CTCTTTCAAT  | TCGGACGAAT  |
| <i>Eremosparton flaccidum</i>     | AGCTTCCAGT | TATTATGGTC | GGAATTTTTTT  | CTCTTTCAAT  | TCGGACGAAT  |
| <i>Colutea persica</i>            | AGCTTCCAGT | TATTATGGTC | GGAATTTTTTT  | CTCTTTCAAT  | TCGGACGAAT  |
| <i>C. triphylla</i>               | AGCTTCCAGT | TATTATGGTC | GGAATTTTTTT  | CTCTTTCAAT  | TCGGACGAAT  |
| <i>Sphaerophylla salsula</i>      | AGCTTCCAGT | TATTATGGTC | GGAATTTTTTT  | CTCTTTCAAT  | TCGGACGAAT  |
| <i>Podlechiella vogelii</i>       | AGCTTCCAGT | TATTATGGTC | GGAATTTTTTT  | ATCTTTCAAT  | TCAGACGAAT  |
| <i>Carmichaelia australis</i>     | CGCTTCCAGT | TATTTTGGTC | GGAATTTTTTT  | CTCTTTTAAAT | TCGGACGAAT  |
| <i>Sutherlandia frutescens</i>    | AGCTTCCAGT | TATTATGGTC | GGAATTTTTTT  | CTCTTTCAAT  | TCGGGCGAAT  |
| <i>Astragalus membranaceus</i>    | AGCTTCCAGT | TATTATGGTC | GGAATTTTTTT  | CTCTTTCAAT  | TCGTCCGAAT  |
| <i>A.mongholicus</i>              | AGCTTCCAGT | TATTATGGTC | GGAATTTTTTT  | CTCTTTCAAT  | TCGTCCGAAT  |
| <i>A.nakaianus</i>                | AGCTTCCAGT | TATTATGGTC | GGAATTTTTTT  | CTCTTTCAAT  | TCGTCCGAAT  |
| <i>A.macropelmatus</i>            | AGCTTCCAGT | TATTATGGTC | GGAATTTTTTT  | CTCTTTCAAT  | TCGTCCGAAT  |
| <i>A.iranicus</i>                 | AGCTTCCAGT | TATTATGGTC | GGAATTTTTTT  | CTCTTTCAAT  | TCGTCCGAAT  |
| <i>A.denudatus</i>                | AGCTTCCAGT | TATTATGGTC | GGAATTTTTTT  | CTCTTTCAAT  | TCGTCCGAAT  |
| <i>A.odoratus</i>                 | AGCTTCCAGT | TATTATGGTC | GGAATTTTTTT  | CTCTTTCAAT  | TCGTCCGAAT  |
| <i>Oxytropis szovitsii</i>        | AGCTTCCAGT | TATTATGGTC | GGAATTTTTTT  | CTCTTTCAAT  | TCGTCCGAAT  |
| <i>O.iranica</i>                  | AGCTTCCAGT | TATTATGGTC | GGAATTTTTTT  | CTCTTTCAAT  | TCGTCCGAAT  |
| <i>O.kotschyana</i>               | AGCTTCCAGT | TATTATGGTC | GGAATTTTTTT  | CTCTTTCAAT  | TCGTCCGAAT  |
| <i>Erophaca baetica</i>           | AGCTTCCAGT | TATTATGGTT | GGAATTTTTTT  | CTCTTTCAAT  | TCGTCCGAAT  |
| <i>Wisteria floribunda</i>        | AGCTTCCAGT | TTTTATGGTA | GGCATTFFFFFF | ATCTTTTCATT | TCGTCTGAGT  |
| <i>W. sinensis</i>                | AGCTTCCAGT | TTTTATGGTA | GGCATTFFFFFF | ATCTTTTCATT | TCGTCTGAGT  |
| <i>Glycyrrhiza lepidota</i>       | AGCTTCCAGT | TATTATGGCA | GGAATTTTGTT  | ATCTTTTCATT | TCGTCCGGAGT |
| <i>G.uralensis</i>                | AGCTTCCAGT | TATTATGGCA | GGAATTTTGTT  | ATCTTTTCATT | TCGTCCGGAGT |
| <i>G.glabra</i>                   | AGCTTCCAGT | TATTATGGCA | GGAATTTTGTT  | ATCTTTTCATT | TCGTCCGGAGT |
| <i>Meristotropis xathioides</i>   | AGCTTCCAGT | TATTATGGCA | GGAATTTTGTT  | ATCTTTTCATT | TCGTCCGGAGT |
| <i>Robinia pseudoacacia</i>       | AGCTTCCAGT | TATGATGGAA | TGAATTTACTT  | ATATTTTCATT | TCGTATGAGT  |
| <i>Lotus japonicus</i>            | AGCTTCCAGT | TATCTTCATA | AGAATTTTTTT  | ATCTTTTCATT | TCGTCTGAGT  |
| <i>Vicia alpestris</i>            | TGTTTCCCGT | TATTATCGGG | GGGCTTTTTTC  | CCTCTTTCATT | TCGTCCGAAT  |
| <i>V.satava</i>                   | AGTTTCCAGT | TATTATGGGG | GGGATTTTTTT  | CTCTTTTCATT | TCGTCCGAAT  |
| <i>V.peregrina</i>                | AGTTTCCAGT | TATTATGGGG | GGGATTTTTTT  | TTCTTTTCATT | TCGTCCGAAT  |
| <i>V.sepium</i>                   | AGTTTCCAGT | TATTATGGGG | GGGATTTTTTT  | CTCTTTTCATT | TCGTCCGAAT  |
| <i>V. faba</i>                    | AGTTTCCAGT | TATTATGGGA | GGGATTTTTTT  | CTCTTTTCATT | TCGTCCGAAT  |

|                      |            |            |             |             |            |
|----------------------|------------|------------|-------------|-------------|------------|
| V.canescens          | AGTTTCCAGT | TATTATGGGA | GGGATTTTTTT | CCCTTTCATT  | TCGTCCGAAT |
| V.monantha           | AGTTTCCAGT | TATTATGGGA | GGTATTTTTTT | CCCTTTCATT  | TCGTCCGAAT |
| V.tetrasperma        | AGTTTCCAGA | TATTATGGGA | GGGATTTTATT | CTCTTTTGATT | TCGTCCGAAT |
| V.narbonensis        | AGTTTCCAGT | TATTATGGGA | GGGATTTTTTT | CTCTTTCATT  | TCGTCCGAAT |
| Lens culinaris       | AGTTTCCAGT | TATTATGGGA | GGGATTTTTTT | CTCTTTCATT  | TCGTCCGAAT |
| L.orientalis         | AGTTTCCAGT | TATTATGGGA | GGGATTTTTTT | CTCTTTCCAT  | TCGTCCGAAT |
| V.ervilia            | TGTTTCCAGT | TATTATGGGA | GGGATTTTTTT | TTCTTTCATT  | TCGTCCGAAT |
| Galega officinalis   | AGTTTCCAGT | TATTATGGTA | GGTCTTTTTTT | CTCTTTCATT  | TCGTCCGAAG |
| Lathyrus palustris_K | GTTTGGCGGG | TTGTACGACG | ACAGAATGTT  | TTTCGATTTG  | AGGGTCTCGG |
| L.palustris_H        | GTTTGGCGGG | TTGTACGACG | ACAGAATGTT  | TTTCGATTTG  | AGGGTCTCGG |
| L.davidii            | GTTTGGCGCA | CTCTACGACG | ACAGAATGTT  | TCTGGATTTG  | A-----CGG  |
| L.japonicus          | GTTTGGCGCG | TTATACGAGG | ACAGACTGTT  | TCTCGATTTG  | AGGGTCTCGG |
| L.ochroleucus        | GTTTAGCGAA | ATATATTATG | ACAGGCTGTT  | TCTCGATTTG  | AGGGTCTCGG |
| L.littoralis         | GTTTGGCGCG | CTGTACGAGG | ACAGAATGTT  | TCTCGATTTG  | AGGGTCTCGG |
| L.venosus            | GTTTGGCGAA | TTATATTATG | ACAGGCTGTT  | TCTCGATTTG  | AAGGTCTCGG |
| L.graminifolius      | GTGTCACGAG | TTGTTTTACG | ATTCCCTCTA  | TCTCGATTTG  | AGGGTCTCGG |
| L.pubescens          | GTCTAAAAGA | ATCTCTGGAT | ATTTCTTGAT  | CGCGTTCCCT  | ATTACCCCTA |
| L.sativus_KJ         | CTATAG---C | AATCTTACTC | GGATGAACAT  | TTTCGATGCA  | CCGATT-AAA |
| L.sativus_HM         | CTATAG---C | AATCTTACTC | GGATGAACAT  | TTTCGATGCA  | CCGATT-AAA |
| L.pseudocicera       | CTATAG---C | AATCTTACTC | GGATGAACAT  | TTTTGATGCA  | CCGATT-ACA |
| L.chloranthus        | -----      | -----      | -----       | -----       | -----      |
| L.pratensis          | -----      | -----      | -----       | -----       | -----      |
| L.odoratus_HM        | -----      | -----      | -----       | -----       | -----      |
| L.odoratus_kJ        | -----      | -----      | -----       | -----       | -----      |
| L.hirsutus           | -----      | -----      | -----       | -----       | -----      |
| L.annuus             | -----      | -----      | -----       | -----       | -----      |
| L.cirrhosus          | CTATATTTTC | AATAAGGTAA | GCACTGAATT  | TTTCGAGTCC  | CCGATT-GAC |
| L.latifolius         | CTATATTTTC | AATAAGATAA | GCACTGAATT  | TTTCGAGTCC  | CCGATT-GAC |
| L.tingitanus         | -----      | -----      | -----ATG    | -----ATG    | CCGACC-CGC |
| Pisum sativum_H      | GCCTTTGTAG | CAGGGTCCCA | AAACAGTTTC  | ACTATTTTGT  | GTGGTTCCTT |
| Pisum sativum_K      | GCCTTTGTAG | CAGGGTCCCA | AAACAGTTTC  | ACTATTTTGT  | GTGGTTCCTT |
| Pisum sativum_HG     | GCCTTTGTAG | CAGGGTCCCA | AAACAGTTTC  | ACTATTTTGT  | GTGGTTCCTT |
| Pisum fulvum         | GCCTTTGTAG | CAGGGTCCCA | AAACAGTTTC  | ACTATTTTGT  | GTGGTTCCTT |
| Vavilovia formosa    | -----      | -----      | -----       | -----       | --GGTTTTTT |
| L.clymenum           | ATATCTTCTT | TGGTTATTTT | CATCTTTTAC  | AGTCATTATG  | GCGCGTATAT |
| L.ochrus             | ATATCTTCTT | TGGTTATTTT | CATCTTTTAC  | AGTCATTATG  | GCGCGTATAT |



|                            |            |            |             |            |            |
|----------------------------|------------|------------|-------------|------------|------------|
| Trifolium strictum         | TTG-----   | --TAGTTCCT | TTTTTGGCCAC | AAGGGGTCAC | GCTTACTTTC |
| T. glanduliferum           | -TG-----   | --TAATTCCT | TTTTTGGCCAC | AAGGGGTCAC | GCTTACTTTC |
| T. boissieri               | TTG-----   | --TAGTTCCT | TTTTTGGCCAC | AAGGGGTCAC | GCTTACTTTC |
| T. aureum                  | TTG-----   | --TAGTTCCT | TTTTTGGCCAC | AAGGGGTCAC | GCTTACTTTC |
| T. meduseum                | TTG-----   | --TAGTTCCT | TTTTTGGCCAC | AAGGGGTCAC | GCTTACTTTC |
| T. subterraneum            | TTG-----   | --TAGTTCCT | TTTTTACCAC  | AAGGGGTCAC | GCTTACTTTC |
| T. pratense                | TTG-----   | --TAGTTCCT | TTTTTGGCCAC | AAGGGGTCAC | GCTTACTTTC |
| T. hybridum                | TTG-----   | --TAGTTCCT | TTTTTGGCCAC | AAGGGGTCAC | GCTTACTTTC |
| T. semipilosum             | TTG-----   | --TAGTTCCT | TTTTTGGCCAC | AAGGGGTCAC | GCTTACTTTC |
| T. occidentale             | TTG-----   | --TAGTTCCT | TTTTTGGCCAC | AAGGGGTCAC | GCTTACTTTC |
| T. repens                  | TTG-----   | --TAGTTCCT | TTTTTGGCCAC | AAGGGGTCAC | GCTTACTTTC |
| T. lupinaster              | TTG-----   | --TAATTCCT | TTTTTGGCCAC | AAGGGGTCAC | GCTTACTTTC |
| Cicer oxyodon              | TTG-----   | --TAGTTCCT | TTTTTGGCCAC | AAGGGGTCAC | ACTTACTTTC |
| C. chorrassanicum          | TTG-----   | --TAGTTCCT | TTTTTGGCCAC | AAGGGGTCAC | ACTGACTTTC |
| C. arietinum               | TTG-----   | --TAGTTCCT | TTTTTGGCCAC | AAGGGGTCAC | ACTGACTTTC |
| Medicago truncatula_KF     | TTG-----   | --TAGTTCCT | TTTTTGGCCAC | AAGGGGTCAC | CCTGACTTTC |
| M. truncatula_AC           | TTG-----   | --TAGTTCCT | TTTTTGGCCAC | AAGGGGTCAC | CCTGACTTTC |
| M. sativa_K                | TTG-----   | --TAGTTCCT | TTTTTGGCCAC | AAGGGGTCAC | CCTGACTTTC |
| M. sativa                  | TTG-----   | --TAGTTCCT | TTTTTGGCCAC | AAGGGGTCAC | CCTGACTTTC |
| M. papillosa               | TTG-----   | --TAGTTCCT | TTTTTGGCCAC | AAGGGGTCAC | CCTGACTTTC |
| M. hybrida                 | TTG-----   | --TAGTTCCT | TTTTTGGCCAC | AAGGGGTCAC | CCTGACTTTC |
| M. falcata                 | TTG-----   | --TAGTTCCT | TTTTTGGCCAC | AAGGGGTCAC | CCTGACTTTC |
| M. sativa_KU               | TTG-----   | --TAGTTCCT | TTTTTGGCCAC | AAGGGGTCAC | CCTGACTTTC |
| Melilotus albus            | TTG-----   | --TAGTTCCT | TTTTTGGCCAC | AAGGGGTCAC | CCTGACTTTC |
| Hedysarum formosum         | CTG-----   | --TAGTTCCT | TTTTTGGCCAC | AAGGGGCCAC | GCTGACTTTC |
| H. varium                  | CTG-----   | --TAGTTCCT | TTTTTGGCCAC | AAGGGGCCAC | GCTGACTTTC |
| H. singarense              | CTG-----   | --TAGTTCCT | TTTTTGGCCAC | AAGGGGCCAC | GCTTACTTTC |
| H. minjanense              | CTG-----   | --TAGTTCCT | TTTTTGGCCAC | AAGGGGCCAC | ACTGACTTTC |
| Tavniera glabra            | CTG-----   | --TAGTTCCT | TTTTTGGCCAC | AAGGGGCCAC | GCTAACTTTC |
| T. diffusa                 | CTG-----   | --TAGTTCCT | TTTTTGGCCAC | AAGGGGCCAC | GCTAACTTTC |
| Greuteria membranacea      | CTG-----   | --TAGTTCCT | TTTTTGGCCAC | AGGGGGCTAC | GCTGACTTTC |
| Corethroedendron scoparium | CTG-----   | --TAGTTCCT | TTTTTGGCCAC | AGGGGGCCAC | GCTGACTTTC |
| Eversmannia subspinosa     | TTG-----   | --TAGTTCCT | TTTTTGGCCAC | AGGGGGCCAC | GCTGACTTTC |
| Onobrychis bungei          | CTG-----   | --TAGTTCCT | TTTTTGGCCAC | AGGGGGCCAC | ACTGACTTTC |
| O. cornuta                 | CTG-----   | --TAGTTCCT | TTTTTGGCCAC | AGGGGGCCAC | GCTCACTTTC |
| O. michauxii               | CTG-----   | --TAGTTCCT | TTTTTGGCCAC | AGGGGGCCAC | GCTGACTTTC |
| O. subacaulis              | CTG-----   | --TAGTTCCT | TTTTTGGCCAC | AGGGGGCCAC | GCTAACTTTC |
| O. teheranica              | CTG-----   | --TAGTTCCT | TTTTTGGCCAC | AGGGGGCCAC | GCTGACTTTC |
| Alhagi maurorum            | TTG-----   | --TAGTTCCT | TTTTTGGCCAC | AAGGGGCCAC | GCTAACTTTC |
| Caragana microphylla       | TTG-----   | --TAGTTCCT | TTTTTGGCCAC | AAGGGGCCAC | GCTGACTTTC |
| C. korshinski              | TTG-----   | --TAGTTCCT | TTTTTGGCCAC | AAGGGGCCAC | GCTGACTTTC |
| C. kozlowii                | TTG-----   | --TAGTTCCT | TTTTTGGCCAC | AAGGGGCCAC | GCTGACTTTC |
| C. rosea                   | TTG-----   | --TAGTTCCT | TTTTTGGCCAC | AAGGGGCCAC | GCTGACTTTC |
| Tibetia liangshanensis     | TTG-----   | --TAGTTCCT | TTTTTGGCCAC | AAGGGGCCAC | GCTTACTTTC |
| Gueldenstaedtia verna      | TTG-----   | --TAGTTCCT | TTTTTGGCCAC | AAGGGGCCAC | GCTTACTTTC |
| Halimodendron halodendron  | AGC-----   | --AAGGTCTA | TATTTACCTC  | AGGGGC-AT  | GCTT-CTTTC |
| Smirnowia turkestanica     | TTA-----   | --TAGTTCCT | TTTTTGGCCAC | AAGGGGTCAC | GCTGACTTTC |
| Eremosparton flaccidum     | TTA-----   | --TAGTTCCT | TTTTTGGCCAC | AAGGGGTCAC | GCTGACTTTC |
| Colutea persica            | TTC-----   | --TAGTTCCT | TTTTTGGCCAC | AAGGGGTCAC | GCTGACTTTC |
| C. triphylla               | TTC-----   | --TAGTTCCT | TTTTTGGCCAC | AAGGGGTCAC | GGTGACTTTC |
| Sphaerophylla salsula      | TTA-----   | --TAGTTCCT | TTTTTGGCCAC | AAGGGGTCAC | GCTGACTTTC |
| Podlechiya vogelii         | TTC-----   | --TAGTTCCT | TTTTTGGCCAC | AAGGGGTCAC | GCTGACTTTC |
| Carmichaelia australis     | TTC-----   | --TAGTTCCT | TTTTTGGCCAC | AAGGGGTCAC | GCTGACTTTC |
| Sutherlandia frutescens    | TTC-----   | --TAGTTCCT | TTTTTGGCCAC | AAGGGGTCAC | GGTGACTTTC |
| Astragalus membranaceus    | TTC-----   | --TAGTTCCT | TTTTTGGCCAC | AAGGGGTCAC | GCTGACTTTC |
| A. mongholicus             | TTC-----   | --TAGTTCCT | TTTTTGGCCAC | AAGGGGTCAC | GCTGACTTTC |
| A. nakaianus               | TTC-----   | --TAGTTCCT | TTTTTGGCCAC | AAGGGGTCAC | GCTGACTTTC |
| A. macropelmatus           | TTC-----   | --TAGTTCCT | TTTTTGGCCAC | AAGGGGTCAC | GCTGACTTTC |
| A. iranicus                | TTC-----   | --TAGTTCCT | TTTTTGGCCAC | AAGGGGTCAC | GCTGACTTTC |
| A. denudatus               | TTC-----   | --TAGTTCCT | TTTTTGGCCAC | AAGGGGTCAC | GCTGACTTTC |
| A. odoratus                | TTC-----   | --TAGTTCCT | TTTTTGGCCAC | AAGGGGTCAC | GCTGACTTTC |
| Oxytropis szovitsii        | TTC-----   | --TAGTTCCT | TTTTTGGCCAC | AAGGGGTCAC | GCTGACTTTC |
| O. iranica                 | TTC-----   | --TAGTTCCT | TTTTTGGCCAC | AAGGGGTCAC | GCTGACTTTC |
| O. kotschyana              | TTC-----   | --TAGTTCCT | TTTTTGGCCAC | AAGGGGTCAC | GCTGACTTTC |
| Erophaca baetica           | TTG-----   | --TAGTTCCT | TTTTTGGCCAC | AAGGGGTCAC | GCTGACTTTC |
| Wisteria floribunda        | TTGAGCCTGA | GCTAGTTCCT | TTTTTGGCCAC | AAGGGGTCAC | GATGACTATC |
| W. sinensis                | TTGAGCCTGA | GCTAGTTCCT | TTTTTGGCCAC | AAGGGGTCAC | GATGACTATC |
| Glycyrrhiza lepidota       | TTGAGCCTGA | GCTAGTTCCT | TTTTTGGCCAC | AAGGGGCCAC | GATGACTTTC |
| G. uralensis               | TTGAGCCTGA | GCTAGTTCCT | TTTTTGGCCAC | AAGGGGCCAC | GATGACTTTC |
| G. glabra                  | TTGAGCCTGA | GCTAGTTCCT | TTTTTGGCCAC | AAGGGGCCAC | GATGACTTTC |
| Meristotropis xathioides   | TTGAGCCTGA | GCTAGTTCCT | TTTTTGGCCAC | AAGGGGCCAC | GATGACTTTC |
| Robinia pseudoacacia       | TTGACCCCGG | GCTAATTTCT | TTTTTGGCCAC | AAGGGGCTAC | GATAATGGTC |
| Lotus japonicus            | TTGATTCCGA | GCTAATTCGT | TTTTTGGCCAC | AAGGGGCTAC | GATAACTGTT |
| Vicia alpestris            | CGC-----   | --TCCTTCT  | TTCTTCCCAC  | AAGGGGTCAG | GGTGACTCGC |
| V. sativa                  | TTG-----   | --TCATTCCT | TTTTTGGCCAC | AAGGAGTCAC | ACTGACTTTC |
| V. peregrina               | TTG-----   | --TCATTCCT | TTTTTGGCCAC | AAGGAGTCAC | ACTGACTTTC |
| V. sepium                  | TTG-----   | --TCATTCCT | TTTTTGGCCAC | AAGGAGTCAC | GCTTACTTTC |
| V. faba                    | TTG-----   | --TCATTCCT | TTTTTGGACAC | AAGGAGTCAC | GCTGACTTTC |

|                      |             |            |             |            |            |
|----------------------|-------------|------------|-------------|------------|------------|
| V.canescens          | TTG-----    | --TCATTCCT | TTTTTTGCCAC | AAGGGGTCAC | GCTGACTTTC |
| V.monantha           | TTG-----    | --TCATTCCT | TTTTTTGCCAC | AAGGGGTCAC | GCTGACTTTC |
| V.tetrasperma        | TTG-----    | --TCATTCCT | TTTGTGCCAC  | AAGGGGTCAC | GCTGACTTTC |
| V.narbonensis        | TTG-----    | --TCATTCCT | TTTTTTGCCAC | AAGGGGTCAC | GCTTACTTTC |
| Lens culinaris       | TTT-----    | --TCATTCCT | TTTTTTGCCAC | AAGGGGTCAC | GCTGACTTTC |
| L.orientalis         | TTT-----    | --TCATTCCT | TTTTTTGCCAC | AAGGGGTCAC | CGTGACTTTC |
| V.ervilia            | CTC-----    | --TCGTTTCT | TTTTTTGCCAC | AAGGGGTCAC | GCTCACTTTC |
| Galega officinalis   | -----       | --TAGTTCCT | TTTTTTGCCAC | AAGGGGTCAC | GCTAACTTTC |
| Lathyrus palustris_K | TCGTC-----  | -CATCTCCTT | ACAACACGGA  | AATATGTAAT | ATTAATTCTC |
| L.palustris_H        | TCGTC-----  | -CATCTCCTT | ACAACACGGA  | AATATGTAAT | ATTAATTCTC |
| L.davidii            | TAGGC-----  | -CATATCCTT | AAAACACGGA  | AATATCAGAT | ATTAATTCTC |
| L.japonicus          | TCGTC-----  | -CATATCCTT | ACAACACGGA  | AATATGTAAT | ATTAGTTCTC |
| L.ochroleucus        | TCGTC-----  | -CATATCCTT | ACAACACGGA  | AATATGTGAT | ATTCATTCTG |
| L.littoralis         | TCGTC-----  | -CATATCCTT | ACAACACGGA  | AATATGTGAT | ATTAATTCTC |
| L.venosus            | TCGTC-----  | -CATATGCTT | ACAACACGGA  | AATATGTGAT | ATTAATTCTC |
| L.graminifolius      | TCGTC-----  | -CATATCCTT | ACAACACGGA  | AATATGTGAT | ATTTATTCTC |
| L.pubescens          | TTATC-----  | -CGTATCGAT | AACCCAGTAA  | AATATATGAA | GCATGCTCCT |
| L.sativus_KJ         | TGGCT-----  | -CTTTGTGCT | ACCAAATAAG  | ATTG---TTT | CTCTGCTTAT |
| L.sativus_HM         | TGGCT-----  | -CTTTGTGCT | ACCAAATAAG  | ATTG---TTT | CTCTGCTTAT |
| L.pseudocicera       | TGGCT-----  | -CTTTGTGCC | ACCAAATAAG  | ATTA---TTT | ATCTGCTTGT |
| L.chloranthus        | -----       | -----      | -----       | -----      | -----      |
| L.pratensis          | -----       | -----      | -----       | -----      | -----      |
| L.odoratus_HM        | -----       | -----      | -----       | -----      | -----      |
| L.odoratus_kJ        | -----       | -----      | -----       | -----      | -----      |
| L.hirsutus           | -----       | -----      | -----       | -----      | -----      |
| L.annuus             | -----       | -----      | -----       | -----      | -----      |
| L.cirrhosus          | AGGGT-----  | -CTTCGATGT | GCCAGTTAAT  | ACTACGCTTT | TTCTGCTTGG |
| L.latifolius         | AGGGT-----  | -CTTCGATGT | GCCAGTTAAA  | ACTACGCTTT | TTCTGCTTGG |
| L.tingitanus         | GCGGT-----  | -CTATGTGCC | ACCAGAGAAT  | AAGG---TAA | GGGTGCTTGT |
| Pisum sativum_H      | CAAATT----- | -TTTACATTC | ATT-TGGGAG  | GAAGTTTTTC | GCTTACATTC |
| Pisum sativum_K      | CAAATT----- | -TTTACATTC | ATT-TGGGAG  | GAAGTTTTTC | GCTTACATTC |
| Pisum sativum_HG     | CAAATT----- | -TTTACATTC | ATT-TGGGAG  | GAAGTTTTTC | GCTTACATTC |
| Pisum fulvum         | CAAATT----- | -TTTACATTC | ATT-TGGGAG  | GAAGTTTTTC | GCTTACATTC |
| Vavilovia formosa    | TCATTT----- | -TTTAGATTC | ATT-TGGGAG  | CAAGTTTTTC | GCTTACATTC |
| L.clymenum           | CGTTTAG---  | -TTTGCAATT | ATTGTGGGCG  | TACTTTTTTA | GCTTTCATGC |
| L.ochrus             | CGTTTAG---  | -TTTGCAATT | ATTATGGGCG  | TACTTTTTTA | GCTTTCATGC |

|                                   |            |            |             |            |            |
|-----------------------------------|------------|------------|-------------|------------|------------|
| <i>Trifolium strictum</i>         | TAT---GGAA | TCGCGGGTCT | CTTTCTAAGT  | TTACATTGGT | GGCTTCTTAT |
| <i>T. glanduliferum</i>           | TAT---GGAA | TCGCGGGTCT | CTTTCTAAGT  | TTACATTGGT | GGCTTCTTAT |
| <i>T. boissieri</i>               | TAT---GGAA | TCGCGGGTCT | CTTTCTAAGT  | TTACATTGGT | GGCTTCTTAT |
| <i>T. aureum</i>                  | TAT---GGAA | TCGCGGGTCT | CTTTCTAAGT  | TTACATTGGT | GGCTTCTTAT |
| <i>T. meduseum</i>                | TAT---GGAA | TCGCGGGTCT | CTTTCTAAGT  | TTACATTGGT | GGCTTCTTAT |
| <i>T. subterraneum</i>            | TAT---GGAA | TCGCGGGTCT | CTTTCTAAGT  | TTACATTGGT | GGCTTCTTAT |
| <i>T. pratense</i>                | TAT---GGAA | TCGCGGGTCT | CTTTCTAAGT  | TTACATTGGT | GGCTTCTTTT |
| <i>T. hybridum</i>                | TAT---GGAA | TCGCGGGTCT | CTTTCTAAGT  | TTACATTGGT | GGCTTCTTAT |
| <i>T. semipilosum</i>             | TAT---GGAA | TCGCGGGTCT | CTTTCTAAGT  | TTACATTGGT | GGCTTCTTAT |
| <i>T. occidentale</i>             | TAT---GGAA | TCGCGGGTCT | CTTTCTAAGT  | TTACATTGGT | GGCTTCTTAT |
| <i>T. repens</i>                  | TAT---GGAA | TCGCGGGTCT | CTTTCTAAGT  | TTACATTGGT | GGCTTCTTAT |
| <i>T. lupinaster</i>              | TAT---GGAA | TCGCGGGTCT | CTTTCTAAGT  | TTACATTGGT | GGCTTCTTAT |
| <i>Cicer oxyodon</i>              | TAT---GGAA | TCGCGGGTCT | CTTTCTAAGT  | TTTCATTGGT | GGCTTCTCAT |
| <i>C. chorrassanicum</i>          | TAT---GGAA | TCGCGGGTCT | CTTTCTAAGT  | TTTCATTGGT | GGCTTCTCAT |
| <i>C. arietinum</i>               | TAT---GGAA | TCGCCGGTTT | CTTTCTAAGT  | TTTCATTGGT | GGCTTCTCAT |
| <i>Medicago truncatula_KF</i>     | TAT---GGAA | TCGCGGGTCT | CTTTCTAAGT  | TTACATTGGT | GGCTTCTAAT |
| <i>M. truncatula_AC</i>           | TAT---GGAA | TCGCGGGTCT | CTTTCTAAGT  | TTACATTGGT | GGCTTCTAAT |
| <i>M. sativa_K</i>                | TAT---GGAA | TCGCGGGTCT | CTTTCTAAGT  | TTACATTGGT | GGCTTCTAAT |
| <i>M. sativa</i>                  | TAT---GGAA | TCGCGGGTCT | CTTTCTAAGT  | TTACATTGGT | GGCTTCTAAT |
| <i>M. papillosa</i>               | TAT---GGAA | TCGCGGGTCT | CTTTCTAAGT  | TTACATTGGT | GGCTTCTAAT |
| <i>M. hybrida</i>                 | TAT---GGAA | TCGCGGGTCT | CTTTCTAAGT  | TTACATTGGT | GGCTTCTAAT |
| <i>M. falcata</i>                 | TAT---GGAA | TCGCGGGTCT | CTTTCTAAGT  | TTACATTGGT | GGCTTCTAAT |
| <i>M. sativa_KU</i>               | TAT---GGAA | TCGCGGGTCT | CTTTCTAAGT  | TTACATTGGT | GGCTTCTAAT |
| <i>Melilotus albus</i>            | TAT---GGAA | TCGCGGGTCT | CTTTTTAAGT  | TTACATTGGT | GGCTTCTAAT |
| <i>Hedysarum formosum</i>         | TAT---GGAA | TCGCGGGTCT | GTTTGTAAGT  | TTACATTGGT | GGATTCTAAT |
| <i>H. varium</i>                  | TAT---GGAA | TCGCGGGTCT | GTTTGTAAGT  | TTACATTGGT | GGATTCTCAT |
| <i>H. singarense</i>              | TAT---GGAA | TCGCGGGTCT | GTTTGTAAGT  | TTTCATTGGT | GGATTCTCAT |
| <i>H. minjanense</i>              | TAT---GGAA | TCGCGGGTCT | TTTTGTCAAGT | TTTCATTGGT | GGATTCTAAT |
| <i>Tavrniera glabra</i>           | TAT---GGAA | TCGCGGGTCT | GTTTGTAAGT  | TTCCATTGGT | GGATTCTAAT |
| <i>T. diffusa</i>                 | TAT---GGAA | TCGCGGGTCT | GTTTGTAAGT  | TTCCATTGGT | GGATTCTAAT |
| <i>Greuteria membranacea</i>      | TAT---GGAA | TCGCGGGTCT | ATTTGTAAGT  | TTTCATTGGT | GGATTCTAAT |
| <i>Corethroedendron scoparium</i> | TAT---GGAA | TCGCGGGTCT | ATTTGTAAGT  | TTTCATTGGT | GGATTCTAAT |
| <i>Eversmannia subspinosa</i>     | TAT---GGAA | TCGCGGGTCT | ATTTGTAAGT  | TTTCATTGGT | GGATTCTAAT |
| <i>Onobrychis bungei</i>          | TAT---GGAA | TCGCGGGTCT | GTTTGTAAGT  | TTTCATTGGT | GGATTCTAAT |
| <i>O. cornuta</i>                 | TAT---GGAA | TCGCGGGTCT | GTTTGTAAGT  | TTTCATTGGT | GGATTCTAAT |
| <i>O. michauxii</i>               | TAT---GGAA | TCGCGGGTCT | GTTTGTAAGT  | TTTCATTGGT | GGATTCTAAT |
| <i>O. subacaulis</i>              | TAT---GGAA | TCGCGGGTCT | GTTTGTAAGT  | TTTCATTGGT | GGATTCTAAT |
| <i>O. teheranica</i>              | TAT---GGAA | TCGCGGGTCT | GTTTGTAAGT  | TTTCATTGGT | GGATTCTAAT |
| <i>Alhagi maurorum</i>            | TAT---GGAA | TCGCGGGTCT | ATTTGTAAGT  | TTTCATTGGT | GGATTCTCAT |
| <i>Caragana microphylla</i>       | TAT---GGAA | TCGCGGGTCT | CTTTGTAAAGT | TTTCATTGGT | GGATTCTAAT |
| <i>C. korshinski</i>              | TAT---GGAA | TCGCGGGTCT | CTTTGTAAAGT | TTTCATTGGT | GGATTCTAAT |
| <i>C. kozlowii</i>                | TAT---GGAA | TCGCGGGTCT | GTTTGTAAGT  | TTTCATTGGT | GGATTCTAAT |
| <i>C. rosea</i>                   | TAT---GGAA | TCGCGGGTCT | CTTTGTAAAGT | TTTCATTGGT | GGATTCTAAT |
| <i>Tibetia liangshanensis</i>     | TAT---GGAA | TCGCGGGTCT | CTTTGTAAAGT | TTTCATTGGT | GGATTCTCAT |
| <i>Gueldenstaedtia verna</i>      | TAT---GGAA | TCGCGGGTCT | CTTTGAAAGT  | TTTCATTGGT | GGATTCTCAT |
| <i>Halimodendron halodendron</i>  | TTT---AGAA | TCGGTGGTTG | ATCTTGTAAGT | TTCCATGGGA | GATTGGATTT |
| <i>Smirnowia turkestanica</i>     | TAT---GGAA | TCTCAGGTCT | TTTTGTAAAGT | TTTCATTGGT | GGCTTCTAAT |
| <i>Eremosparton flaccidum</i>     | TAT---GGAA | TCTCAGGTCT | TTTTGTAAAGT | TTTCATTGGT | GGCTTCTAAT |
| <i>Colutea persica</i>            | TAT---GGAA | TCTCAGGTCT | TTTTGTAAAGT | TTTCATTGGT | GGCTTTTAAT |
| <i>C. triphylla</i>               | TAT---GGAA | TCTCAGGTCT | TTTTGTAAAGT | TTTCATTGGG | GGCTTTTAAT |
| <i>Sphaerophylla salsula</i>      | TAT---GGAA | TCTCAGGTCT | TTTTGTAAAGT | TTTCATTGGG | GGCTTTTAAT |
| <i>Podlechiella vogelii</i>       | TAT---GGAA | TCTCAGGTCT | TTTTGTAAAGT | TTTCATTGGT | GGCTTCTAAT |
| <i>Carmichaelia australis</i>     | TAT---GGAA | TCTCAGGTCT | TTTTGTAAAGT | TTTCATTGGT | GGCTTCTAAT |
| <i>Sutherlandia frutescens</i>    | TAT---GGAA | TTTCCGGTCT | TTTTGTAAAGT | TTTCATTGGT | GGCTTCTAAT |
| <i>Astragalus membranaceus</i>    | TAT---GGAA | TCTCAGGTCT | TTTTGTAAAGT | TTTCATTGGT | GGCTTCTAAT |
| <i>A. mongholicus</i>             | TAT---GGAA | TCTCAGGTCT | TTTTGTAAAGT | TTTCATTGGT | GGCTTCTAAT |
| <i>A. nakaianus</i>               | TAT---GGAA | TCTCAGGTCT | TTTTGTAAAGT | TTTCATTGGT | GGCTTCTAAT |
| <i>A. macropelmatus</i>           | TAT---GGAA | TCTCAGGTCT | TTTTGTAAAGT | TTTCATTGGT | GGCTTCTAAT |
| <i>A. iranicus</i>                | TAT---GGAA | TCTCAGGTCT | TTTTGTAAAGT | TTTCATTGGT | GGCTTCTAAT |
| <i>A. denudatus</i>               | TAT---GGAA | TCTCAGGTCT | TTTTGTAAAGT | TTTCATTGGT | GGCTTCTAAT |
| <i>A. odoratus</i>                | TAT---GGAA | TCTCAGGTCT | TTTTGTAAAGT | TTTCATTGGT | GGCTTCTAAT |
| <i>Oxytropis szovitsii</i>        | TAT---GGAA | TCTCAGGTCT | TTTTGTAAAGT | TTTCATTGGT | GGCTTCTAAT |
| <i>O. iranica</i>                 | TAT---GGAA | TCTCAGGTCT | TTTTGTAAAGT | TTTCATTGGT | GGCTTCTAAT |
| <i>O. kotschyana</i>              | TAC---GGAA | TCTCAGGTCT | TTTTGTAAAGT | TTTCATTGGT | GGCTTCTAAT |
| <i>Erophaca baetica</i>           | TAT---GGAA | TCTCAGGTCT | TTTTGTAAAGT | TTTCATTGGT | GGCTTCTAAT |
| <i>Wisteria floribunda</i>        | TAT---GGAA | CCGCGGGTCT | CTTTCTAAGT  | TTTTCTTGGT | GGCTTCTAAT |
| <i>W. sinensis</i>                | TAT---GGAA | CCGCGGGTCT | CTTTCTAAGT  | TTTTCTTGGT | GGCTTCTAAT |
| <i>Glycyrrhiza lepidota</i>       | TAT---GGAA | CCGCGGGTCT | CTTTCTAAGT  | TTTTCTTGGT | GGCTTCTAAT |
| <i>G. uralensis</i>               | TAT---GGAA | CCGCGGGTCT | CTTTCTAAGT  | TTTTCTTGGT | GGCTTCTAAT |
| <i>G. glabra</i>                  | TAT---GGAA | CCGCGGGTCT | CTTTCTAAGT  | TTTTCTTGGT | GGCTTCTAAT |
| <i>Meristotropis xathioides</i>   | TAT---GGAA | CCGCGGGTCT | CTTTCTAAGT  | TTTTCTTGGT | GGCTTCTAAT |
| <i>Robinia pseudoacacia</i>       | TAT---TCAA | CCATGTTTCT | ATTTTTAAGT  | TTTTCTTGGT | GGCTTCTAAT |
| <i>Lotus japonicus</i>            | TAT---GGGA | CCGCGGGTCT | ATTTGTTAGT  | TTGTTTTTGT | GGCTTACCAT |
| <i>Vicia alpestris</i>            | TAT---GGAA | TGGCAGGCCT | CCCTCTTAG-  | TCCCCTGCA  | CCACCAATC  |
| <i>V. sativa</i>                  | TAT---GGAA | TTGCAGGTCT | CTTTCTAAGT  | TTACATTGGT | GGCTTCTCCT |
| <i>V. peregrina</i>               | TAT---GGAA | TTGCAGGTCT | CTTTCTAAGT  | TTACATTGGT | GGCTTCTCCT |
| <i>V. sepium</i>                  | TAT---GGAA | TTGCAGGTCT | CTTTCTAAGT  | TTACATTGGT | GGCTTCTCAT |
| <i>V. faba</i>                    | TAT---GGAA | TTGCCGGTCT | CTTTCTAAGT  | TTACATTGGT | GGCTTCTAAT |

|                      |            |            |            |            |            |
|----------------------|------------|------------|------------|------------|------------|
| V.canescens          | TAT---GGAA | TTGCGGGTCT | CTTTCTAAGT | TTACATTGGT | GGCTTATAAT |
| V.monantha           | TAT---GGAA | TTGCGGGTCT | CTTTCTAAGT | TTACATTGGT | GGCTTCTAAT |
| V.tetrasperma        | TAT---GGAA | TTGCGGGTCT | CTTTCTAAGT | TTACATTGGT | GGCTTCTAAT |
| V.narbonensis        | TAT---GGAA | TTGCAGGTCT | CTTTCTAAGT | TTACATTGGT | GGCTTCTATT |
| Lens culinaris       | TAT---GGAA | TTGCAGGTCT | CTTTCTAAGT | TTACATTGGT | GGCTTCTAAT |
| L.orientalis         | TAT---GGAA | TTGCAGGTCT | CTTTCTAAGT | TTCCCTTGGT | GGCTTCTAAT |
| V.ervilia            | TAT---GGAA | TCGCGGGTCT | CCTTCTAAGT | TTACATTGGT | GGCTTCTAAT |
| Galega officinalis   | TAT---GGAA | TCGCGGGTCT | CTTTCTAAGT | TTCCATTGGT | GGCTTCTAAT |
| Lathyrus palustris_K | CTT---GCAA | TTATAAATAT | ACTCATAACT | ATAGGGGGTT | CATTTCTATT |
| L.palustris_H        | CTT---GCAG | TTATAAATAT | ACTCATAACT | ATAGGGGGTT | CATTTCTATT |
| L.davidii            | CTT---GCAA | TTGGAAATAT | ACTCATAAGT | ATCGCAGGTT | CCTTCTTATT |
| L.japonicus          | CTT---GCAA | TTCTAACTAT | ATTCATAAGT | ATAGCAGGTT | CATTTGTATT |
| L.ochroleucus        | CTT---GCAA | TTATAAATAT | ACTAATTGCA | ATAGGAGGTT | CATTTCTTTT |
| L.littoralis         | CTT---GGAA | TTATAAATAT | ACTCATAAGT | CTAGCAGGTT | CATTTCTATT |
| L.venosus            | CTT---GCAA | TTATAAATAT | ACTAATTGGC | ATAGGGGGTT | CATTTCTTTT |
| L.graminifolius      | TTT---GCAA | TAATAAATAT | ACTCCTGAGT | CTAGGTGGTT | CATTTCTTTT |
| L.pubescens          | CTATTAGCAA | TGCTAAGTCT | CCTTGGAAGT | TTAGCGTGTT | CGCTTGTATT |
| L.sativus_KJ         | CACT--GCAA | TTGTCAGTAT | CCTAAGCGGT | ATCATGTTTC | AATATATTAA |
| L.sativus_HM         | CACT--GCAA | TTGTCAGTAT | CCTAAGCGGT | ATCATGTTTC | AATATATTAA |
| L.pseudocicera       | CACT--GCAA | TTGTAAGTAT | CCTAATCGGT | ATCATGTTTC | AATATATTAA |
| L.chloranthus        | -----      | -----      | -----      | -----      | -----      |
| L.pratensis          | -----      | -----      | -----      | -----      | -----      |
| L.odoratus_HM        | -----      | -----      | -----      | -----      | -----      |
| L.odoratus_kJ        | -----      | -----      | -----      | -----      | -----      |
| L.hirsutus           | -----      | -----      | -----      | -----      | -----      |
| L.annuus             | -----      | -----      | -----      | -----      | -----      |
| L.cirrhosus          | CAAA--GGAA | TCGTAAGTCT | CGTTTTAGGT | TTTTTATTAG | TATACAAAAC |
| L.latifolius         | CAAA--GGAA | TCGTAGGTAT | CGTTTTAGGT | TTTTTGTTGG | TATACAAAAC |
| L.tingitanus         | CTTT--GGAA | TTGTAGGTAT | CCTTCTAGGT | TTCGGGTGTT | TGCTTAATCT |
| Pisum sativum_H      | AGAT--GAAG | TTGTCCAGTG | TGCCACGAG- | ----AAGAAA | GGGTCAGGCT |
| Pisum sativum_K      | AGAT--GAAG | TTGTCCAGTG | TGCCACGAG- | ----AAGAAA | GGGTCAGGCT |
| Pisum sativum_HG     | AGAT--GAAG | TTGTCCAGTG | TGCCACGAG- | ----AAGAAA | GGGTCAGGCT |
| Pisum fulvum         | AGAT--GAAG | TTGTCCAGTG | TGCCACGAG- | ----AAGAAA | GGGTCAGGCT |
| Vavilovia formosa    | AGAA--GAAG | TTGTCCAGTG | TGCCACGAG- | ----AAATAA | GGGTCAGGCT |
| L.clymenum           | CGGT--CAAC | TGGATCTTCG | TGCCACCAGC | -CAGACAAAA | GGGTCAGGCT |
| L.ochrus             | CGGT--CAAC | TGGATCTTCG | TGCCACCAG- | ----ACAAAA | GGGTCAGGCT |

|                                   |             |            |             |             |             |
|-----------------------------------|-------------|------------|-------------|-------------|-------------|
| <i>Trifolium strictum</i>         | TTTTTGGAAAT | GT-GGGGAGT | GGTTATAAATT | TTTTTCGATAA | AAAAAATCGA  |
| <i>T. glanduliferum</i>           | TTTTTGGAAAT | GT-GGGGAGT | GGTTATAAATT | TTTTTCGATAA | AAAAAATCGA  |
| <i>T. boissieri</i>               | TTTTTGGAAAT | GT-GGGGAGT | GGTTATAAATT | TTTTTCGATAA | AAAAAATCGA  |
| <i>T. aureum</i>                  | TTTTTGGAAAT | GT-GGGGAGT | GGTTATAAATT | TTTTTCGATAA | AAAAAATCGA  |
| <i>T. meduseum</i>                | TTTTTGGAAAT | GT-GGGGAGT | GGTTATAAATT | TTTTTCGATAA | AAAAAATCGA  |
| <i>T. subterraneum</i>            | TTTTTGGAAAT | GT-GGGGAGT | GGTTATAAATT | TTTTTCGATAA | AAAAAATCGA  |
| <i>T. pratense</i>                | TTTTTGGGAT  | GT-GGGGAGT | GGCTATAAATT | TTTTTCGATAA | AAAAAATCGA  |
| <i>T. hybridum</i>                | TTTTTGGAAAT | GT-GGGGAGT | GGTTATAAATT | TTTTTCGATAA | AAAAAATCGA  |
| <i>T. semipilosum</i>             | TTTTTGGAAAT | GT-GGGGAGT | GGTTATAAATT | TTTTTCGATAA | AAAAAATCGA  |
| <i>T. occidentale</i>             | TTTTTGGAAAT | GT-GGGGAGT | GGTTATAAATT | TTTTTCGATAA | AAAAAATCGA  |
| <i>T. repens</i>                  | TTTTTGGAAAT | GT-GGGGAGT | GGTTATAAATT | TTTTTCGATAA | AAAAAATCGA  |
| <i>T. lupinaster</i>              | TTTTTGGAAAT | GT-GGGGAGT | GGCTATAAATT | TTTTTCGATAA | AAAAAATCGA  |
| <i>Cicer oxyodon</i>              | TTTTTGGAAAT | GT-GGGTAGT | GGTTATAAATT | TTTTTGATAA  | AAAAAATAGA  |
| <i>C. chorrassanicum</i>          | TTTTTGGAAAT | GT-GGGTAGT | GGTTATAAATT | TTTTTGATAA  | AAAAAATAGA  |
| <i>C. arietinum</i>               | TTTTTGGAAAT | GT-GGGTAGT | GGTTATAAATT | TTTTTGATAA  | AAAAAATAGA  |
| <i>Medicago truncatula_KF</i>     | TTTTTGGAAAT | GT-GGGGAGT | GGTTATAAATT | TTTTTCGATAA | AAAAAAGAGA  |
| <i>M. truncatula_AC</i>           | TTTTTGGAAAT | GT-GGGGAGT | GGTTATAAATT | TTTTTCGATAA | AAAAAAGAGA  |
| <i>M. sativa_K</i>                | TTTTTGGAAAT | GT-GGGGAGT | GGTTATAAATT | TTTTTCGATAA | AAAAAATAGA  |
| <i>M. sativa</i>                  | TTTTTGGAAAT | GT-GGGGAGT | GGTTATAAATT | TTTTTCGATAA | AAAAAATAGA  |
| <i>M. papillosa</i>               | TTTTTGGAAAT | GT-GGGGAGT | GGTTATAAATT | TTTTTCGATAA | AAAAAATAGA  |
| <i>M. hybrida</i>                 | TTTTTGGAAAT | GT-GGGGAGT | GGTTATAAATT | TTTTTCGATAA | AAAAAATAGA  |
| <i>M. falcata</i>                 | TTTTTGGAAAT | GT-GGGGAGT | GGTTATAAATT | TTTTTCGATAA | AAAAAATAGA  |
| <i>M. sativa_KU</i>               | TTTTTGGAAAT | GT-GGGGAGT | GGTTATAAATT | TTTTTCGATAA | AAAAAATAGA  |
| <i>Melilotus albus</i>            | TTTTTGGAAAT | GT-GGGGAGT | GGTTATAAATT | TTTTTCGATAA | AAAAAATCGA  |
| <i>Hedysarum formosum</i>         | TTTTTGGAAAT | GT-GGGTAGT | GGTTATAAATC | TTTATGATAA  | CCAAATGGGA  |
| <i>H. varium</i>                  | TTTTTGGAAAT | GT-GGGTAGT | GGTTATAAATC | TTTATGATAA  | CCAAATGGGA  |
| <i>H. singanense</i>              | TTTTTGGAAAT | GT-GGGTAGT | GGTTATAAATC | TTTATGATAA  | CCAAATGGGA  |
| <i>H. minjanense</i>              | TTTTTGGAAAT | GT-GGGTAGT | GGTTATAAATC | TTTATGATAA  | CCAAATGGGA  |
| <i>Tavniera glabra</i>            | TTTTTTAAT   | GT-GGGTAGT | GGTTATAAATC | TTTACGATAA  | CCAAATGGGA  |
| <i>T. diffusa</i>                 | TTTTTTAAT   | GT-GGGTAGT | GGTTATAAATC | TTTACGATAA  | CCAAATGGGA  |
| <i>Greuteria membranacea</i>      | TTTTTGGAAAT | GT-GGGTAGT | GGTTATAAATC | TTTACGATAA  | CCAAATGGGA  |
| <i>Corethroedendron scoparium</i> | TTTTTGGAAAT | GT-GGGTAGT | GGTTATAAATC | TTTACGATAA  | CCAAATGGGA  |
| <i>Eversmannia subspinosa</i>     | TTTTTGGAAAT | GT-AGGTAGT | GGTTATAAATC | TTTACGATAA  | CCAAATGGGA  |
| <i>Onobrychis bungei</i>          | TTTTTGGAAAT | GT-GGGTAGT | GGTTATAAATC | TTTACGATAA  | CCAAATGGGA  |
| <i>O. cornuta</i>                 | TTTTTGGAAAT | GT-GGGTAGT | GGTTATAAATC | TTTACGATAA  | CCAAATGGGA  |
| <i>O. michauxii</i>               | TTTTTGGAAAT | GT-GGGTAGT | GGTTATAAATC | TTTATGATAA  | CCAAATGGGA  |
| <i>O. subacaulis</i>              | TTTTTGGAAAT | GT-GGGTAGT | GGTTATAAATC | TTTACGATAA  | CCAAATGGGA  |
| <i>O. teheranica</i>              | TTTTTGGAAAT | GT-GGGTAGT | GGTTATAAATC | TTTACGATAA  | CCAAATGGGA  |
| <i>Alhagi maurorum</i>            | TTTTTGGAAAT | GT-GGGTAGT | GGTTATAAATC | TTTACGATAA  | CCAAATGGGA  |
| <i>Caragana microphylla</i>       | TTTTTGGAAAT | GT-GGGTAGT | GGTTATAAATC | TTTACGATAA  | TCAAATGGGA  |
| <i>C. korshinski</i>              | TTTTTGGAAAT | GT-GGGTAGT | GGTTATAAATC | TTTACGATAA  | TCAAATGGGA  |
| <i>C. kozlowii</i>                | TTTTTGTAAAT | GT-GGGTAGT | GGTTATAAATC | TTTACGATAA  | TCAAATGGGA  |
| <i>C. rosea</i>                   | TTTTTGGAAAT | GT-GGGTAGT | GGTTATAAATC | TTTACGATAA  | TCAAATGGGA  |
| <i>Tibetia liangshanensis</i>     | TTTTTGGAAAT | GT-GGGTAGT | GGTTATAAATC | TTTACGATAG  | CAAATGGGA   |
| <i>Gueldenstaedtia verna</i>      | TCTTTGGAAAT | GT-GGGTAGG | GGTAATAAATC | TTTACAATAA  | -AAAATGGGA  |
| <i>Halimodendron halodendron</i>  | TATTTTAAAT  | GT-AACTAGT | TTTTTTATTT  | ATATGGAGAT  | ACAACGTGCT  |
| <i>Smirnowia turkestanica</i>     | TTTGTGGAAAT | GT-GGGTAGT | GGTTATAAATC | TTTACGATAA  | AAAAAATGGGA |
| <i>Eremosparton flaccidum</i>     | TTTGTGGAAAT | GT-GGGTAGT | GGTTATAAATC | TTTACGATAA  | AAAAAATGGGA |
| <i>Colutea persica</i>            | TTTGTGGAAAT | GT-GGGTAGT | GGTTATAAATC | TTTACGATAA  | AAAAAATGGGA |
| <i>C. triphylla</i>               | TTTGTGGAAAT | GT-GGGTAGT | GGTTATAAATC | TTTACGATAA  | AAAAAATGGGA |
| <i>Sphaerophylla salsula</i>      | TTTGTGGAAA  | GT-GGGTAGG | GGTTATAAATC | TTTACGATAA  | AAAAAATGGGA |
| <i>Podlechiella vogelii</i>       | TTTGTGGAAAT | GT-GGGTAGT | GGTTATAAATC | TTTACGATAA  | AAAAAATGGGA |
| <i>Carmichaelia australis</i>     | TTTGTGGAAAT | GT-GGGTAGT | GGTTATAAATC | TTTACGATAA  | AAAAAATGGGA |
| <i>Sutherlandia frutescens</i>    | TTTGTGGAAAT | GT-GGGTAGT | GGTTATAAATC | TTTACGATAA  | AAAAAATGGGA |
| <i>Astragalus membranaceus</i>    | TTTGTGGAAAT | GT-GGGTAGT | GGTTATAAATC | TTTACGATAA  | AAAAAATGGGA |
| <i>A. mongholicus</i>             | TTTGTGGAAAT | GT-GGGTAGT | GGTTATAAATC | TTTACGATAA  | AAAAAATGGGA |
| <i>A. nakaianus</i>               | TTTGTGGAAAT | GT-GGGTAGT | GGTTATAAATC | TTTACGATAA  | AAAAAATGGGA |
| <i>A. macropelmatus</i>           | TTTGTGGAAAT | GT-GGGTAGT | GGTTATAAATC | TTTACGATAA  | AAAAAATGGGA |
| <i>A. iranicus</i>                | TTTGTGGAAAT | GT-GGGTAGT | GGTTATAAATC | TTTACGATAA  | AAAAAATGGGA |
| <i>A. denudatus</i>               | TTTGTGGAAAT | GT-GGGTAGT | GGTTATAAATC | TTTACGATAA  | AAAAAATGGGA |
| <i>A. odoratus</i>                | TTTGTGGAAAT | GT-GGGTAGT | GGTTATAAATC | TTTACGATAA  | AAAAAATGGGA |
| <i>Oxytropis szovitsii</i>        | TATGTGGAAAT | GT-GGGTAGT | GGTTATAAACC | TTTACGATAA  | AAAAAATGGGA |
| <i>O. iranica</i>                 | TATGTGGAAAT | GT-GGGTAGT | GGTTATAAACC | TTTACGATAA  | AAAAAATGGGA |
| <i>O. kotschyana</i>              | TATGTGGAAAT | GT-GGGGAGT | GGTTATAAATC | TTTACGATAA  | AAAAAATGGGA |
| <i>Erophaca baetica</i>           | TTTGTGGAAAT | GT-GGGTAGT | GGTTATAAATC | TTTACGATAA  | AAAAAATGGGA |
| <i>Wisteria floribunda</i>        | TTTTTGGAAAT | GT-GGGTAGT | GGTTATGATT  | TTTTTGATAA  | AAAAAATGGGA |
| <i>W. sinensis</i>                | TTTTTGGAAAT | GT-GGGTAGT | GGTTATGATT  | TTTTTGATAA  | AAAAAATGGGA |
| <i>Glycyrrhiza lepidota</i>       | TTTTTGGAAAT | GT-GGGTAGT | GGTTATGATT  | TTTTTCGATAA | AAAAAATAAA  |
| <i>G. uralensis</i>               | TTTTTGGAAAT | GT-GGGTAGT | GGTTATGATT  | TTTTTCGATAA | AAAAAATAAA  |
| <i>G. glabra</i>                  | TTTTTGGAAAT | GT-GGGTAGT | GGTTATGATT  | TTTTTCGATAA | AAAAAATAAA  |
| <i>Meristotropis xathioides</i>   | TTTTTGGAAAT | GT-GGGTAGT | GGTTATGATT  | TTTTTCGATAA | AAAAAATAAA  |
| <i>Robinia pseudoacacia</i>       | TTTTTGGAAAT | GT-GGGTAGT | GGCTATGATC  | TTTTTCGATAA | AAAAACTAGA  |
| <i>Lotus japonicus</i>            | TTTTTGGAAAT | GT-GGGCAGT | GGTTATGATC  | TTTTTCGATAA | AAAAAGAGGA  |
| <i>Vicia alpestris</i>            | TGATTGCACC  | ACCAGGGAGT | GCTTATAATA  | ATTACGACCC  | ACCAAATGAA  |
| <i>V. sativa</i>                  | TTTTTGGAAAT | GT-GGGGAGT | GGCTATAAATT | TTTTTCGATAA | AAAAAATCAA  |
| <i>V. peregrina</i>               | TTTTTGGAAAT | GT-GGGGAGT | GGCTATAAATT | TTTTTCGATAA | AAAAAATAAA  |
| <i>V. sepium</i>                  | TTTTTGGAAAT | GT-GGGGAGT | GGCTATAAATT | TTTTTCGATAA | AAAAAATCGA  |
| <i>V. faba</i>                    | TTTTTGGAAAT | GT-GGGGAGT | GGCTATAAATT | TTTTTCGATAA | AAAAAATCGA  |

|                      |             |            |             |             |            |
|----------------------|-------------|------------|-------------|-------------|------------|
| V.canescens          | TTTTTGGAAAT | GT-GGGGAGT | GGCTATAAATT | TTTTTCGATAA | AAAAAATAGA |
| V.monantha           | TTTTTGGAAAT | GT-GGGGAGT | GGCTATAAATT | TTTTTCGATAA | AAAAAATAGA |
| V.tetrasperma        | TTTTTGGAAAT | GT-CGGGAGT | GGCTATAAATT | TTTTTCGATAA | AAAAAATAGA |
| V.narbonensis        | TTTTTGGAAAT | GT-GGGGAGT | GGCTATAAATT | TTTTTCGATAA | AAAAAATAGA |
| Lens culinaris       | TTTTTGGAAAT | GT-GGGGAGT | GGCTATAAATT | TTTTTCGATAA | AAAAAATAGA |
| L.orientalis         | TTTTTGGAAAT | GT-GGGGAGT | GGCTATAAATT | TTTTTCGATAA | AAAAAATAGA |
| V.ervilia            | TTTTTGGAAAT | GT-AGGGAGT | GTTTATAAATT | TTTTTCGATAA | AAAAAATCGA |
| Galega officinalis   | TTTTTGGAAAT | GT-GGGTAGT | GTTTATAAATT | TTTTTGATAA  | AAAAAATAGA |
| Lathyrus palustris_K | TTATTGGAAT  | AA-AGGGGGT | GGCTCAAATT  | TTTTTGATAA  | AAAAAATGGA |
| L.palustris_H        | TTATTGGAAT  | AA-AGGGGGT | GGATCCAATT  | TTTTTGATAA  | AAAAAATGGA |
| L.davidii            | CTATTATAAT  | AG-AGGAGCT | GGATATAAATT | TCTTCGATAG  | AGAGAAGGGT |
| L.japonicus          | TTATTGGAAC  | AG-GGGCGGT | GGCTACAATT  | TGTTTCGATAA | AAAAAATGGA |
| L.ochroleucus        | TTATTGGAAC  | AA-GGGGTCC | GGCTTCAATT  | TTTTTCGATAA | AAAAAATGGC |
| L.littoralis         | CTATTGGAAT  | CG-GGGAGGT | GGCTCCAATT  | TTTTTCGATAA | AAAAAATGAA |
| L.venosus            | TTATTGGAAC  | AA-GGGCAGC | GGCGCCAATT  | TTTTTCGATAA | AAAAAATGGT |
| L.graminifolius      | TTATTGGAAT  | AC-GGGCGCC | GGCTCCAATT  | TTTTTCGATAA | AAAAAAGAT  |
| L.pubescens          | TTATTGGAAT  | GT-AGGAAGC | GGGTATAATC  | TATACCATAA  | AGCAAAAGGA |
| L.sativus_KJ         | TTATTGGACT  | GT-AATTGGC | GGAACTAATT  | TTTTTCGATAA | AAGAAAAGGA |
| L.sativus_HM         | TTATTGGACT  | GT-AATTGGC | GGAACTAATT  | TTTTTCGATAA | AAGAAAAGGA |
| L.pseudocicera       | TTATTGCACT  | GT-AACTGGC | GGAACTAATT  | TTTTTCGATAA | AGAAGAAGGA |
| L.chloranthus        | -----       | -----      | -----       | -----       | -----      |
| L.pratensis          | -----       | -----      | -----       | -----       | -----      |
| L.odoratus_HM        | -----       | -----      | -----       | -----       | -----      |
| L.odoratus_kJ        | -----       | -----      | -----       | -----       | -----      |
| L.hirsutus           | -----       | -----      | -----       | -----       | -----      |
| L.annuus             | -----       | -----      | -----       | -----       | -----      |
| L.cirrhosus          | CTATTGCAAT  | AA-TAACAGC | GGAACTAATT  | GTTTTGATAA  | AACAAAAGGA |
| L.latifolius         | CTATTCCAAT  | AG-TAACAGC | GGAACTAATT  | GTTTTGATAA  | AACAAAAGGA |
| L.tingitanus         | TTATTGCAAT  | GT-GGGGAGT | GGCTCTAATT  | TTTTTCGATAA | AAAAAATGGA |
| Pisum sativum_H      | GCTTTTGTAT  | GC-----AAT | TGTAAAGATC  | TTTCTAACGT  | --TATATCGA |
| Pisum sativum_K      | GCTTTTGTAT  | GC-----AAT | TGTAAAGATC  | TTTCTAACGT  | --TATATCGA |
| Pisum sativum_HG     | GCTTTTGTAT  | GC-----AAT | TGTAAAGATC  | TTTCTAACGT  | --TATATCGA |
| Pisum fulvum         | GCTTTTGTAT  | GC-----AAT | TGTAAAGATC  | TTTCTAACGT  | --TATATCGA |
| Vavilovia formosa    | GCTTGTGTAT  | GC-----AAT | TGTACATATC  | CTTGGATTTT  | --TATATAAT |
| L.clymenum           | GCTTTTCTAT  | GC-----AAT | TGGAAGTATC  | GCTCTATGTT  | --TATGGTGT |
| L.ochrus             | GCTTTTCTAT  | GC-----AAT | TGGAAGTATC  | GCTCTATGTT  | --TATGGTGT |

|                                  |            |             |             |            |             |
|----------------------------------|------------|-------------|-------------|------------|-------------|
| <i>Trifolium strictum</i>        | ATGGTGTGTT | TTTTTCGTTA  | CGGATTT---  | ---CCTGGAA | CATATCGTCG  |
| <i>T. glanduliferum</i>          | ATGGTGTGTT | TTTTTCGTTA  | CGGATTT---  | ---CCTGGAA | CATATCGTCG  |
| <i>T. boissieri</i>              | ATGGTGTGTT | TTTTTCGTTA  | CGGATTT---  | ---CCTGGAA | CATATCGTCG  |
| <i>T. aureum</i>                 | ATGGTGTGTT | TTTTTCGTTA  | CGGATTT---  | ---CCTGGAA | CATATCGTCG  |
| <i>T. meduseum</i>               | ATGGTTTGTT | TTTTTCGTTA  | CGGATTT---  | ---CCTGGAA | CATATCGTCG  |
| <i>T. subterraneum</i>           | ATGGTTTGTT | TTTTTCGTTA  | CGGATTT---  | ---CCTGGAA | CATATCGTCG  |
| <i>T. pratense</i>               | ATGGTTTGTT | TTTTTCGTTA  | CGGATTT---  | ---CCCAGAA | CATATCGTCG  |
| <i>T. hybridum</i>               | ATGATTTGTT | TTTTTCGTTA  | TGGATTT---  | ---CCTGGAA | CATATCGTCG  |
| <i>T. semipilosum</i>            | ATGGTTTGTT | TTTTTCGTTA  | TGGATTT---  | ---CCTGGAA | CATATCGTCG  |
| <i>T. occidentale</i>            | ATGGTTTGTT | TTTTTCGTTA  | CGGATTT---  | ---CCTGGAA | CATATCGTCG  |
| <i>T. repens</i>                 | ATGGTTTGTT | TTTTTCGTTA  | CGGATTT---  | ---CCTGGAA | CATATCGTCG  |
| <i>T. lupinaster</i>             | ATGGTGTGTT | TTTTTCGTTA  | CGGATTT---  | ---CCTGGAA | CATATCGTCG  |
| <i>Cicer oxyodon</i>             | ATGGTGTGTT | TTTTTCGTTA  | CGGATTT---  | ---CCTGGAA | CATATCGTCG  |
| <i>C. chorrassanicum</i>         | ATGGTGTGTT | TTTTTCGTTA  | CGGATTT---  | ---CCTGGAA | CATATCGCCG  |
| <i>C. arietinum</i>              | ATGGTGTGTT | TTTTTCGTTA  | CGGATTT---  | ---CCTGGAA | CATATCGTCG  |
| <i>Medicago truncatula_KF</i>    | ATGGTGTGTT | TTTTTCGTTA  | CGGATTT---  | ---CCTGGAA | CATATCGTCG  |
| <i>M. truncatula_AC</i>          | ATGGTGTGTT | TTTTTCGTTA  | CGGATTT---  | ---CCTGGAA | CATATCGTCG  |
| <i>M. sativa_K</i>               | ATGGTGTGTT | TTTTTCGTTA  | CGGATTT---  | ---CCTGGAA | CATATCGTCG  |
| <i>M. sativa</i>                 | ATGGTGTGTT | TTTTTCGTTA  | CGGATTT---  | ---CCTGGAA | CATATCGTCG  |
| <i>M. papillosa</i>              | ATGGTGTGTT | TTTTTCGTTA  | CGGATTT---  | ---CCTGGAA | CATATCGTCG  |
| <i>M. hybrida</i>                | ATGGTGTGTT | TTTTTCGTTA  | CGGATTT---  | ---CCTGGAA | CATATCGTCG  |
| <i>M. falcata</i>                | ATGGTGTGTT | TTTTTCGTTA  | CGGATTT---  | ---CCTGGAA | CATATCGTCG  |
| <i>M. sativa_KU</i>              | ATGGTGTGTT | TTTTTCGTTA  | CGGATTT---  | ---CCTGGAA | CATATCGTCG  |
| <i>Melilotus albus</i>           | ATGGTGTGTT | TTTTTCGTTA  | CGGATTT---  | ---CCTGGAA | CATATCGTCG  |
| <i>Hedysarum formosum</i>        | ATGGTGTGGC | TTTGTCGTTA  | CGGATTT---  | ---CCTGGAG | AAAATCGTTA  |
| <i>H. varium</i>                 | ATGGTGTGGC | TTTGTCGTTA  | CGGATTT---  | ---CCTGGAG | AAAATCGTTA  |
| <i>H. singarense</i>             | ATGGTGTGGC | TTTGTCGTTA  | CGGATTT---  | ---CCTGGAG | AAAATCGTTA  |
| <i>H. minjanense</i>             | ATGGTGTGGC | TTTGTCGTTA  | CGGATTT---  | ---CCTGGAG | AAAATCGTTA  |
| <i>Tavniera glabra</i>           | ATGGTGTGGC | TTTGTCGTTA  | CGGATTT---  | ---CCTGGAG | AAAATCGTTA  |
| <i>T. diffusa</i>                | ATGGTGTGGC | TTTGTCGTTA  | CGGATTT---  | ---CCTGGAG | AAAATCGTTA  |
| <i>Greuteria membranacea</i>     | ATGGTGTGGC | TTTGTCGTTA  | CGGATTT---  | ---CCTGGAG | AAAATCGTTA  |
| <i>Corethroedron scoparium</i>   | ATGGTGTGGC | TTTGTCGTTA  | CGGATTT---  | ---CCTGGAG | AAAATCGTTA  |
| <i>Eversmannia subspinosa</i>    | ATGGTGTGGC | TTTGTCGTTA  | CGGATTT---  | ---CCTGGAG | AAAATCGTTA  |
| <i>Onobrychis bungei</i>         | ATGGTGTGGC | TTTGTCGTTA  | CGGATTT---  | ---CCTGGAG | AAAATCGTTG  |
| <i>O. cornuta</i>                | ATGGTGTGGC | TTTGTCGTTA  | CGGATTT---  | ---CCTGGAG | AAAATCGTTG  |
| <i>O. michauxii</i>              | ATGGTGTGGC | TTTGTCGTTA  | CGGATTT---  | ---CCTGGAG | AAAATCGTTG  |
| <i>O. subacaulis</i>             | ATGGTGTGGC | TTTGTCGTTA  | CGGATTT---  | ---CCTGGAG | AAAATCGTTG  |
| <i>O. teheranica</i>             | ATGGTGTGGC | TTTGTCGTTA  | CGGATTT---  | ---CCTGGAG | AAAATCGTTG  |
| <i>Alhagi maurorum</i>           | ATGGTGTGGC | TTTGTCGTTA  | CGGATTT---  | ---CCTGGAG | AAAATCGTTA  |
| <i>Caragana microphylla</i>      | ATGGTGTGGT | TTTTTCGTTA  | CGGATTT---  | ---CCTGGAG | AAAATCGCTG  |
| <i>C. korshinski</i>             | ATGGTGTGGT | TTTTTCGTTA  | CGGATTT---  | ---CCTGGAG | AAAATCGCTG  |
| <i>C. kozlowii</i>               | ATGGTGTGGT | TTTTTCGTTA  | CGGATTT---  | ---CCTGGAG | AAAATCGTTG  |
| <i>C. rosea</i>                  | ATGGTGTGGT | TTTTTCGTTA  | CGGATTT---  | ---CCTGGAG | AAAATCGTTG  |
| <i>Tibetia liangshanensis</i>    | ATGGTGTGGT | TATTTTCGTTA | CGGATTT---  | ---CCTGGAG | AAAATCGTTG  |
| <i>Gueldenstaedtia verna</i>     | ATGGTGCCTG | -ATTTTCGT-A | CGGATTT---  | ---CCTGGCG | AAAATCGT-G  |
| <i>Halimodendron halodendron</i> | GTGTTGTGAA | TTATTTATTA  | ATGGTTTT--- | ---TCCAGAG | AAATTTTTTCG |
| <i>Smirnowia turkestanica</i>    | ATGGTGTGGT | TTTTTCGTTA  | CGGATTT---  | ---CCCAGAG | AAAATCGTCG  |
| <i>Eremosparton flaccidum</i>    | ATGGTGTGGT | TTTTTCGTTA  | CGGATTT---  | ---CCCAGAG | AAAATCGTCG  |
| <i>Colutea persica</i>           | ATGGTGTGGT | TTTTTCGTTA  | CGGATTT---  | ---CCCAGAG | AAAATCGTCG  |
| <i>C. triphylla</i>              | ATGGGGTGGT | TTTTTCGTTA  | CGGATTT---  | ---CCCAGAG | AAAATCGTCG  |
| <i>Sphaerophylla salsula</i>     | ATGGTGTGGT | TTTTTCGTTA  | CGGGTTTT--- | ---CCCAGAG | AAAATTTGTCG |
| <i>Podlechiella vogelii</i>      | ATGGTGTGGT | TTTTTCGTTA  | CGGATTT---  | ---CCTGGAG | AAAATCGTCG  |
| <i>Carmichaelia australis</i>    | ATGGTGTGGT | TTTTTCGTTA  | CGGATTT---  | ---CCCAGAG | AAAATCGTCG  |
| <i>Sutherlandia frutescens</i>   | ATGGTATGGT | TTTTTCGTTA  | CGGATTT---  | ---CCCAGAG | AAAATCGTCG  |
| <i>Astragalus membranaceus</i>   | ATGGTGCCTG | TTTTTCGTTA  | CGGATTT---  | ---CCCAGAG | AAAATCGTCG  |
| <i>A. mongholicus</i>            | ATGGTGCCTG | TTTTTCGTTA  | CGGATTT---  | ---CCCAGAG | AAAATCGTCG  |
| <i>A. nakaianus</i>              | ATGGTGCCTG | TTTTTCGTTA  | CGGATTT---  | ---CCCAGAG | AAAATCGTCG  |
| <i>A. macropelmatus</i>          | ATGGTGCCTG | TTTTTCGTTA  | CGGATTT---  | ---CCCAGAG | AAAATCGTCG  |
| <i>A. iranicus</i>               | ATGGTGCCTG | TTTTTCGTTA  | CGGATTT---  | ---CCCAGAG | AAAATCGTCG  |
| <i>A. denudatus</i>              | ATGGTGCCTG | TTTTTCGTTA  | CGGATTT---  | ---CCCAGAG | AAAATCGTCG  |
| <i>A. odoratus</i>               | ATGGTGCCTG | TTTTTCGTTA  | CGGATTT---  | ---CCCAGAG | AAAATCGTCG  |
| <i>Oxytropis szovitsii</i>       | ATGGTGCCTG | TTTTTCGTTA  | CGGATTT---  | ---CCCAGAG | AAAATCGTCG  |
| <i>O. iranica</i>                | ATGGTGCCTG | TTTTTCGTTA  | CGGATTT---  | ---CCCAGAG | AAAATCGTCG  |
| <i>O. kotschyana</i>             | ATGGTGCCTG | TTTTTCGTTA  | CGGATTT---  | ---CCCAGAG | AAAATCGTCG  |
| <i>Erophaca baetica</i>          | ATGGTGTGGT | TTTTTCGTTA  | CGGATTT---  | ---CCTGGAG | AAAATCGTCG  |
| <i>Wisteria floribunda</i>       | ATGGTGTCTT | TTTTTCGTTA  | CGGATTT---  | ---CCTGGAA | AAAATCGTCG  |
| <i>W. sinensis</i>               | ATGGTGTCTT | TTTTTCGTTA  | CGGATTT---  | ---CCTGGAA | AAAATCGTCG  |
| <i>Glycyrrhiza lepidota</i>      | ATGGTGTGTT | TTTTTCGTTA  | CGGATTT---  | ---CCTGGAA | AAAATCGTCG  |
| <i>G. uralensis</i>              | ATGGTGTGTT | TTTTTCGTTA  | CGGATTT---  | ---CCTGGAA | AAAATCGTCG  |
| <i>G. glabra</i>                 | ATGGTGTGTT | TTTTTCGTTA  | CGGATTT---  | ---CCTGGAA | AAAATCGTCG  |
| <i>Meristotropis xathioides</i>  | ATGGTGTGTT | TTTTTCGTTA  | CGGATTT---  | ---CCTGGAA | AAAATCGTCG  |
| <i>Robinia pseudoacacia</i>      | ACAGTGCTCT | TTTTTCGTTA  | TGGATTT---  | ---CCTGGAA | AAAATCGTCG  |
| <i>Lotus japonicus</i>           | ATAGTGTGCA | TTTTTCGTTA  | CGGATTT---  | ---CCTGGAA | AAAATCGTCG  |
| <i>Vicia alpestris</i>           | ATGGTATATT | CTTCTCCACA  | TCCAGTT---  | ---CTTCCAA | CATTTTCTTG  |
| <i>V. sativa</i>                 | ATGGTATGTT | TTTTTCGTTA  | CGGATTT---  | ---CCTGGAA | CATATCGTCG  |
| <i>V. peregrina</i>              | ATGGTATGTT | TTTTTCGTTA  | CGGATTT---  | ---CCTGGAA | CATATCGTCG  |
| <i>V. sepium</i>                 | ATGGTATGTT | TTTTTCGTTA  | CGGATTT---  | ---CCTGGAA | CATATCGTCG  |
| <i>V. faba</i>                   | ATGGTATGTT | TTTTTCGTTA  | CGGATTT---  | ---CCTGGAA | CATATCGTCG  |

|                      |            |            |            |             |            |
|----------------------|------------|------------|------------|-------------|------------|
| V.canescens          | ATGGTATGTT | TTTTTCGTTA | CGGATTT--- | ---CCTGGAA  | CATATCGTCC |
| V.monantha           | ATGGTATGTT | TTTTTCGTTA | CGGATTT--- | ---CCTGGAA  | CATATCGTCC |
| V.tetrasperma        | ATGGTATGTT | TTGTTCGCTA | CGGATTT--- | ---CCTGGAA  | CATATCGTCC |
| V.narbonensis        | ATGGTATGTT | TTTTTCGTTA | CGGATTT--- | ---CCTGGAA  | CATATCGTCC |
| Lens culinaris       | ATGGTATGTT | TTTTTCGTTA | CGGATTT--- | ---CCTGGAA  | CATATCGTCC |
| L.orientalis         | ATGGTATGTT | TTTTTCGGTA | CGGATTT--- | ---CCTGGAA  | CATATTGTTG |
| V.ervilia            | ATGGTATGTT | TTTTTCGTTA | CGGATTT--- | ---CCTGGAA  | CAAATCGTCC |
| Galega officinalis   | ACGGTATGTT | TTTTTCGTTA | CGGATTT--- | ---CCTGGAA  | CATATCGTCC |
| Lathyrus palustris_K | CAGGTTTATA | TTACTCGTTA | CGGAATC--- | ---CCTGGAG  | AGGGTCGTTT |
| L.palustris_H        | CGGATTTATA | TTACTCGTTA | CGGAATC--- | ---CCTGGAG  | AGGGTCGTTT |
| L.davidii            | TATATCCATA | TTACTCGTTA | CGGAATC--- | ---CCTGGAG  | AAGGTCGTTT |
| L.japonicus          | CGTGTTTATA | TTACTCGTTA | CGGAATC--- | ---CCTGGAG  | AAGGTCGTTT |
| L.ochroleucus        | AGGGTCTATA | TTACTCGTTA | CGGAATC--- | ---CCTGGAG  | AAGGTCGTTT |
| L.littoralis         | CGCGTCTATC | TTACTCGTTA | CGGAATC--- | ---CCTGGAG  | AAGGTCGTTT |
| L.venosus            | AAGGTCTATA | TTACTCGTTA | CGGAATC--- | ---CCTGGAG  | AAGGTCGTTT |
| L.graminifolius      | GTAATCTATA | TTACTCGTTA | CGGAATC--- | ---CCTGGAG  | AAGGTCGTTT |
| L.pubescens          | ATGGTATATA | TTTCTCGTAA | CGGATTT--- | ---CCTGGAA  | AAGGTCGTTT |
| L.sativus_KJ         | GTGCTATATA | TTACTCGTTA | CAGACTTCCT | ATTCCCTGGAA | TAAGTAGCTC |
| L.sativus_HM         | GTGCTATATA | TTACTCGTTA | CAGACTTCCT | ATTCCCTGGAA | TAAGTAGCTC |
| L.pseudocicera       | GTGCTATATA | TTACTCGTTA | CGGACTTCCT | ATTCCCTGGAA | TAAGTAGCTC |
| L.chloranthus        | -----      | -----      | -----      | -----       | -----      |
| L.pratensis          | -----      | -----      | -----      | -----       | -----      |
| L.odoratus_HM        | -----      | -----      | -----      | -----       | -----      |
| L.odoratus_kJ        | -----      | -----      | -----      | -----       | -----      |
| L.hirsutus           | -----      | -----      | -----      | -----       | -----      |
| L.annuus             | -----      | -----      | -----      | -----       | -----      |
| L.cirrhosus          | ATGCTATATA | TTATTCGTTA | CGAATTCTCC | TTCCCTGGAA  | AAACTAGTCG |
| L.latifolius         | ATGCTATATA | TTATTCGTTA | CGGATTCCCC | TTCCCTGGAA  | AAACTAGTCG |
| L.tingitanus         | ATGGTATCTA | TTACTCGTTA | CGGACTT--- | ---CCTGGAA  | AAGATCGTTG |
| Pisum sativum_H      | ATGAGATTTA | GTTGTCGTTT | CGGCTTT--- | ---TCTGGAA  | GAGATCGTTG |
| Pisum sativum_K      | ATGAGATTTA | GTTGTCGTTT | CGGCTTT--- | ---TCTGGAA  | GAGATCGTTG |
| Pisum sativum_HG     | ATGAGATTTA | GTTGTCGTTT | CGGCTTT--- | ---TCTGGAA  | GAGATCGTTG |
| Pisum fulvum         | ATGAGATTTA | GTTGTCGTTT | CGGCTTT--- | ---TCTGGAA  | GAGATCGTTG |
| Vavilovia formosa    | ATAACATTTA | TTTCTCGTTT | CGGCTTT--- | ---CCTGGAA  | GAGATCGTTG |
| L.clymenum           | TTGTTCTAA  | TTTATTG--- | ---CAAT--- | ---CTGCCGA  | GTGGCTTTAA |
| L.ochrus             | TTGTTCTAA  | TTTATTG--- | ---CAAT--- | ---CTGCCGA  | GTGGCTTTAA |



|                                   |             |            |            |            |            |
|-----------------------------------|-------------|------------|------------|------------|------------|
| <i>Trifolium strictum</i>         | TATTTTTCTC  | CGAGTTCGTA | TGGAAGATAT | TCAGTCCCTC | ATACTACAAG |
| <i>T. glanduliferum</i>           | TATTTTTCTC  | CGAGTTCGTA | TGGAAGATAT | TCAGTCCCTC | ATACTACAAG |
| <i>T. boissieri</i>               | TATTTTTCTC  | CGAGTTCGTA | TGGAAGATAT | TCAGTCCCTC | ATACTACAAG |
| <i>T. aureum</i>                  | TATTTTTCTC  | CGAGTTCGTA | TGGAAGATAT | TCAGTCCCTC | ATACTACAAG |
| <i>T. meduseum</i>                | TATTTTTCTC  | CGAGTTCGTA | TGGAAGATAT | TCAGTCCCTC | ATACTACAAG |
| <i>T. subterraneum</i>            | TATTTTTCTC  | CGAGTTCGTA | TGGCAGATAT | TCAGTCCCTC | ATACTACAAG |
| <i>T. pratense</i>                | TATTTTTCTC  | CGAGTTCGTA | TGGAAGATAT | TCAGTCCCTC | GTACTACAAG |
| <i>T. hybridum</i>                | TATTTTTCTC  | CGAGTTCGTA | TGGAAGATAT | TCAGTCCCTC | ATACTACAAG |
| <i>T. semipilosum</i>             | TATTTTTCTC  | CGAGTTCGTA | TAGAAGATAT | TCAGTCCCTC | ATACTACAAG |
| <i>T. occidentale</i>             | TATTTTTCTC  | CGAGTTCGTA | TGGAAGATAT | TCAGTCCCTC | ATACTACAAG |
| <i>T. repens</i>                  | TATTTTTCTC  | CGAGTTCGTA | TGGAAGATAT | TCAGTCCCTC | ATACTACAAG |
| <i>T. lupinaster</i>              | TATTTTTCTC  | CGAGTTCGTA | TGGAAGATAT | TCAGTCCCTC | ATACTACAAG |
| <i>Cicer oxyodon</i>              | TATTTTTCTC  | CGAGTTCGTA | TGGAAGATAT | TCAGTCCCTC | ATACTACAAG |
| <i>C. chorrassanicum</i>          | TATTTTTCTC  | CGAGTTCGTA | TAGAAAATAT | TCAGTCCCTC | ATACTACAAG |
| <i>C. arietinum</i>               | TATTTTTCTC  | CGAGTTCGTA | TGGAAGATAT | TCAGTCCCTC | ATACTACAAG |
| <i>Medicago truncatula_KF</i>     | TATTTTTCTC  | AGAGTTCGTA | TGGAAGATAT | TCAGTCCCTC | ATACTACAAG |
| <i>M. truncatula_AC</i>           | TATTTTTCTC  | CGAGTTCGTA | TGGAAGATAT | TCAGTCCCTC | ATACTACAAG |
| <i>M. sativa_K</i>                | TATTTTTCTC  | CGAGTTCGTA | TGGAAGATAT | TCAGTCTCTC | ATACTACAAG |
| <i>M. sativa</i>                  | TATTTTTCTC  | CGAGTTCGTA | TGGAAGATAT | TCAGTCTCTC | ATACTACAAG |
| <i>M. papillosa</i>               | TATTTTTCTC  | CGAGTTCGTA | TGGAAGATAT | TCAGTCTCTC | ATACTACAAG |
| <i>M. hybrida</i>                 | TATTTTTCTC  | CGAGTTCGTA | TGGAAGATAT | TCAGTCTCTC | ATACTACAAG |
| <i>M. falcata</i>                 | TATTTTTCTC  | CGAGTTCGTA | TGGAAGATAT | TCAGTCTCTC | ATACTACAAG |
| <i>M. sativa_KU</i>               | TATTTTTCTC  | CGAGTTCGTA | TGGAAGATAT | TCAGTCTCTC | ATACTACAAG |
| <i>Melilotus albus</i>            | TATTTTTCTC  | CGAGTTCGTA | TGGAAGATAT | TCAGTCCCTC | ATACTACAAG |
| <i>Hedysarum formosum</i>         | TATTCTTTCC  | CAAGTTCGTG | TGGAAGATAT | TTTGGCCCTT | CAATTTTATG |
| <i>H. varium</i>                  | TATTCTTTCC  | CAAGTTCGTG | TGGAAGATAT | TTTGGCCCTT | CAATTTTATG |
| <i>H. singanense</i>              | TATTCTTTCC  | CAAGTTCGTG | TGGAAGATAT | TTTGGCCCTT | CAATTTTATG |
| <i>H. minjanense</i>              | TATTCTTTCC  | CAAGTTCGTG | TGGAAGATAT | TTTGGCCCTT | CAATTTTATG |
| <i>Tavrneria glabra</i>           | TATTCTTTCC  | CAAGTTCGTG | TGGAAGATAT | TTTGGCCCTT | CAATTTTATG |
| <i>T. diffusa</i>                 | TATTCTTTCC  | CAAGTTCGTG | TGGAAGATAT | TTTGGCCCTT | CAATTTTATG |
| <i>Greuteria membranacea</i>      | TATTCTTTCC  | CAAGTTCGTG | TGGAAGATAT | TTTGGCCCTT | CAATTTTACG |
| <i>Corethroedendron scoparium</i> | TATTCTTTCC  | CAAGTTCGTG | TGGAAGATAT | TTTGGCCCTT | CAATTTTACG |
| <i>Eversmannia subspinosa</i>     | TATTCTTTCC  | CAAGTTCGTG | TAGAAGATAT | TTTGGCCCTT | CAATTTTACG |
| <i>Onobrychis bungei</i>          | TATTCTTTCC  | CAAGTTCGTG | TGGAAGATAT | TTTGGCCCTT | CAATTTTATG |
| <i>O. cornuta</i>                 | TATTCTTTCC  | CAAGTTCGTG | TGGAAGATAT | TTTGGCCCTT | CAATTTTACG |
| <i>O. michauxii</i>               | TATTCTTTCC  | CAAGTTCGTG | TAGAAGATAT | TTTGGCCCTT | CAATTTTATG |
| <i>O. subacaulis</i>              | TATTCTTTCC  | CAAGTTCGTG | TGGAAGATAT | TTTGGCTCTT | CAATTTTACG |
| <i>O. teheranica</i>              | TATTCTTTCC  | CAAGTTCGTG | TAGAAGATAT | TCTGGCTCTT | CAATTTTACG |
| <i>Alhagi maurorum</i>            | TATTCTTTCC  | CACGTTCGTG | TGGAAGATAT | TCTGGCCCTC | CAATTTTACT |
| <i>Caragana microphylla</i>       | TATTCTTTCC  | CACGTTCGTG | TAGAAGATAT | TCTGGCCCTC | CAATTTTACG |
| <i>C. korshinski</i>              | TATTCTTTCC  | CACGTTCGTG | TAGAAGATAT | TCTGGCCCTC | CAATTTTACG |
| <i>C. kozlowii</i>                | TATTCTTTCC  | CACGTTCGTG | TAGAAGATAT | TCTGGCCCTC | CAATTTTACG |
| <i>C. rosea</i>                   | TATTCTTTCC  | CACGTTCGTG | TAGAAGATAT | TCTGGCCCTC | CAATTTTACG |
| <i>Tibetia liangshanensis</i>     | TATTCTTTCC  | CACGTTCGTG | TGGAAGATAT | TCTAGCCCTC | CAATTTTACG |
| <i>Gueldenstaedtia verna</i>      | AATTCTTTCC  | CACGTTCGTG | TGAAAAATAT | TCTAGCCCTC | CAATTTTACG |
| <i>Halimodendron halodendron</i>  | TATTCTTTCC  | CACCTCCAG  | TTGGAGATAA | TCAGCCCTC  | CAGCAATTTG |
| <i>Smirnowia turkestanica</i>     | TATTCTTTCC  | AAAGTCCGTG | TGGAAGATAT | TCTGGCCCTC | CAATTTTTCG |
| <i>Eremosparton flaccidum</i>     | TATTCTTTCC  | AAAGTCCGTG | TGGAAGATAT | TCTGGCCCTC | CAATTTTTCG |
| <i>Colutea persica</i>            | TATTCTTTCC  | AAAGTCCGTG | TGGAAGATAT | TCTGGCCCTC | CAATTTTTCG |
| <i>C. triphylla</i>               | GATTCTTTCC  | AAAGTCCGTG | TGGAAGATAT | TCTGGCCCTC | CAATTTTTCG |
| <i>Sphaerophysa salsula</i>       | TATTCTTTCC  | CAAGTCCGTG | TGGAAGATAT | TCTGGCCCTC | CAATTTTTCG |
| <i>Podlechiella vogelii</i>       | TATTCTTTCC  | AAAGTCCGTG | TGGAAGATAT | TTTGGCCCTC | CAATTTTTCG |
| <i>Carmichaelia australis</i>     | TATTCTTTCC  | AAAGTCCGTG | TGGAAGATAT | TCTGGCCCTC | CAATTTTTCG |
| <i>Sutherlandia frutescens</i>    | TATTCTTTCC  | AAAGTCCGTG | TGGAAGATAT | TCTGGCCCTT | CAATTTTTCG |
| <i>Astragalus membranaceus</i>    | TATTCTTTCC  | AAAGTCCGTG | TGGAAGATAT | TCTGGCCCTC | CAATTTTTCG |
| <i>A. mongholicus</i>             | TATTCTTTCC  | AAAGTCCGTG | TGGAAGATAT | TCTGGCCCTC | CAATTTTTCG |
| <i>A. nakaianus</i>               | TATTCTTTCC  | AAAGTCCGTG | TGGAAGATAT | TCTGGCCCTC | CAATTTTTCG |
| <i>A. macropelmatus</i>           | TATTCTTTCC  | AAAGTCCGTG | TGGAAGATAT | TCTGGCCCTC | CAATTTTTCG |
| <i>A. iranicus</i>                | TATTCTTTCC  | AAAGTCCGTG | TGGAAGATAT | TCTGGCCCTC | CAATTTTTCG |
| <i>A. denudatus</i>               | TATTCTTTCC  | AAAGTCCGTG | TGGAAGATAT | TCTGGCCCTC | CAATTTTTCG |
| <i>A. odoratus</i>                | TATTCTTTCC  | AAAGTCCGTG | TGGAAGATAT | TCTGGCCCTC | CAATTTTTCG |
| <i>Oxytropis szovitsii</i>        | TATTATTTCC  | AAAGTACGTG | TGGAAGATAT | TCTGGCCCTC | CAATTTTTCG |
| <i>O. iranica</i>                 | TATTATTTCC  | AAAGTACGTG | TGGAAGATAT | TCTGGCCCTC | CAATTTTTCG |
| <i>O. kotschyana</i>              | TATTATTTCC  | AAAGTACGTG | TGGAAGATAT | TCTGGCCCTC | CAATTTTTCG |
| <i>Erophaca baetica</i>           | TATTCTTTCC  | AAAGTCCGTG | TGGAAGATAT | TCTGGCCCTC | CAATTTTTCG |
| <i>Wisteria floribunda</i>        | TATTTTTCTC  | CGAGTCCGTA | TGGACGATAT | TCAGTCCCTC | ATAATACACA |
| <i>W. sinensis</i>                | TATTTTTCTC  | CGAGTCCGTA | TGGACGATAT | TCAGTCCCTC | ATAATACACA |
| <i>Glycyrrhiza lepidota</i>       | TATTTTTTATC | CGAGTCCGTA | TGGACGATAT | TCAGTCCCTC | ATAATACAAA |
| <i>G. uralensis</i>               | TATTTTTTATC | CGAGTCCGTA | TGGACGATAT | TCAGTCCCTC | ATAATACAAA |
| <i>G. glabra</i>                  | TATTTTTTATC | CGAGTCCGTA | TGGACGATAT | TCAGTCCCTC | ATAATACAAA |
| <i>Meristotropis xathioides</i>   | TATTTTTTATC | CGAGTCCGTA | TGGACGATAT | TCAGTCCCTC | ATAATACAAA |
| <i>Robinia pseudoacacia</i>       | TATTTTTTACA | AAAGTCCCTA | TGGACGATAT | TCAGGCCATC | ATAGTACAAA |
| <i>Lotus japonicus</i>            | TATTTTTTATC | CGAGTCCCTA | TCAACGATAT | TCAGTCCCTC | ATAATACAAA |
| <i>Vicia alpestris</i>            | CTCTTGTTTA  | TCAGATCGTT | CGGTAGTACT | ACAGTCCATC | ATAATACCAT |
| <i>V. sativa</i>                  | TATTTTTCTC  | CGAGTTCGTA | TGGAAGATAT | TCAGTCCCTC | ATACTACAAG |
| <i>V. peregrina</i>               | TATTTTTCTC  | CGAGTTCGTA | TGGAAGATAT | TCAGTCCCTC | ATACTACAAG |
| <i>V. sepium</i>                  | TATTTTTCTC  | CGAGTTCGTA | TGGAAGATAT | TCAGTCCCTC | ATACTACAAG |
| <i>V. faba</i>                    | TATTTTTCTC  | CGAGTTCGTA | TGGAAGATAT | TCAGTCCCTC | ATACTACAAG |

|                      |             |             |              |            |            |
|----------------------|-------------|-------------|--------------|------------|------------|
| V.canescens          | TATTTTTCTC  | CGAGTTCGTA  | TGGAAGATAT   | TCAGTCCCTC | ATACTACAAG |
| V.monantha           | TATTTTTCTC  | CGAGTTCGTA  | TGGAAGATAT   | TCAGTCCCTC | ATACTACAAG |
| V.tetrasperma        | TATTTTTCTC  | CGAGTTCGTA  | TGGAAGATAT   | TCAGTCCCTC | ATACTACAAG |
| V.narbonensis        | TATTTTTCTC  | CGAGTTCGTA  | TGGAAGATAT   | TCAGTCCCTC | ATACTACAAG |
| Lens culinaris       | TATTTTTCTC  | CGAGTTCATA  | TGGAAGATAT   | TCAGTCCCTC | ATACTACAAG |
| L.orientalis         | TATTTTTCTC  | CGAGTTCATA  | TGGAAGATAT   | TCAGTCCCTC | ATAATACAAG |
| V.ervilia            | TATTTTTCTC  | CGAGTTCGTA  | TGGA AAAATAT | TAAGTCCCTC | ATACTTCAAG |
| Galega officinalis   | TATTTTTCTA  | CGAGTTCGTA  | TGGAAGATAT   | TCAGTCCCTC | ATACTACAAG |
| Lathyrus palustris_K | TCGTGTTTGG  | GAAATTA AAA | TTAAAGATAT   | ATCCTGCCTA | ATATTAGTAA |
| L.palustris_H        | TCGTGTTTGG  | GAAATTA AAA | TGCAAGATAT   | ATGCTGCCTA | ATATTAGTAA |
| L.davidii            | TCGTATTTGG  | AAAATTC AAA | TTAAAGATGT   | TAATTGTTTA | ACATTAGTAA |
| L.japonicus          | TCGTGTTTGG  | GAAATTGATA  | TTCAAAAATAT  | TTGCTGCCTA | ATATTAGTAA |
| L.ochroleucus        | TCGTGTTTGG  | GAAATATCAA  | CTCAAGATAT   | TAGCTGCCTA | ATATTAGTCA |
| L.littoralis         | TCATGTTTCGG | GAAATTAATA  | TGAAAAATAT   | TTGCTGCCTA | ATATTAGTAA |
| L.venosus            | TCGTGTTTGG  | GAAATTGATA  | TGAAAGATAT   | TAGATGCCTA | ATATTAGTAA |
| L.graminifolius      | TCGTATTTGG  | AAGATTGAAA  | TGAAAGATAT   | TAGATGCCTA | ATATTAGTAA |
| L.pubescens          | TACTGTTCTG  | GAAGTTCCTC  | TGGAAGATAG   | TTTATCGATA | ATCCTCAAAA |
| L.sativus_KJ         | TAATGTTTCGC | CGCATTTTAA  | TAAAAGAAAAT  | TTCGTGCCTC | ATACTAGTAA |
| L.sativus_HM         | TAATGTTTCGC | CGCATTTTAA  | TAAAAGAAAAT  | TTCGTGCCTC | ATACTAGTAA |
| L.pseudocicera       | TAATGTTTCGG | CGCATTTTAA  | TAAAAGAAAAT  | TTCGTGCCTT | ATACTAGTAA |
| L.chloranthus        | -----       | -----       | -----        | -----      | -----      |
| L.pratensis          | -----       | -----       | -----        | -----      | -----      |
| L.odoratus_HM        | -----       | -----       | -----        | -----      | -----      |
| L.odoratus_kJ        | -----       | -----       | -----        | -----      | -----      |
| L.hirsutus           | -----       | -----       | -----        | -----      | -----      |
| L.annuus             | -----       | -----       | -----        | -----      | -----      |
| L.cirrhosus          | TACTGTTCTT  | CACATTCGGC  | TAAAAGATAT   | TACGTGCCTC | ATACTAAGGA |
| L.latifolius         | TACTGTTCTT  | CACATTCGGC  | TAAAAGATAT   | TACGTGCCTC | ATACTCAAGA |
| L.tingitanus         | TACTGTTTTA  | CAAGTTCCTA  | TGAAAGATAT   | TCCGTGCCTC | ATACTAAAAA |
| Pisum sativum_H      | TATTATTCCC  | AGAGTTCCTA  | TGAACGCTAG   | TCAGTGCCTC | ATACAAAAAA |
| Pisum sativum_K      | TATTATTCCC  | AGAGTTCCTA  | TGAACGCTAG   | TCAGTGCCTC | ATACAAAAAA |
| Pisum sativum_HG     | TATTATTCCC  | AGAGTTCCTA  | TGAACGCTAG   | TCAGTGCCTC | ATACAAAAAA |
| Pisum fulvum         | TATTATTCCC  | AGAGTTCCTA  | TGAACGCTAG   | TCAGTGCCTC | ATACAAAAAA |
| Vavilovia formosa    | TATTATTCCC  | AGAGTTCATA  | TGAACAATAG   | TCAGTGCCTC | ATACAAAAAA |
| L.clymenum           | -----       | -----       | -----        | -----      | -----      |
| L.ochrus             | TTTGTTCGAT  | AAAAAACATC  | TAGTGGTATA   | TATTACTCGT | TACGGATTTT |

|                            |             |            |       |      |            |            |            |     |
|----------------------------|-------------|------------|-------|------|------------|------------|------------|-----|
| Trifolium strictum         | CTAACCCCTAA | CCC        | ----- | ---- | AGAACC     | -----      | -----      | T   |
| T. glanduliferum           | CTAACCCCTAA | CCC        | ----- | ---- | AGAACC     | -----      | -----      | T   |
| T. boissieri               | CTAACCCCTAA | CCC        | ----- | ---- | AGAACC     | -----      | -----      | T   |
| T. aureum                  | CTAACCCCTAA | CCC        | ----- | ---- | AGAACC     | -----      | -----      | T   |
| T. meduseum                | CTAACCCCTAA | TCC        | ----- | ---- | AGAACC     | -----      | -----      | T   |
| T. subterraneum            | CTAACCCCTAA | TCC        | ----- | ---- | AGAACC     | -----      | -----      | T   |
| T. pratense                | CTAACCCCTAA | TCC        | ----- | ---- | AGAACC     | -----      | -----      | T   |
| T. hybridum                | CTAACCCCTAA | CCC        | ----- | ---- | AGAACC     | -----      | -----      | T   |
| T. semipilosum             | CTAACCCCTAA | CCC        | ----- | ---- | AGAACC     | -----      | -----      | T   |
| T. occidentale             | CTAACCCCTAA | CCC        | ----- | ---- | AGAACC     | -----      | -----      | T   |
| T. repens                  | CTAACCCCTAA | CCC        | ----- | ---- | AGAACC     | -----      | -----      | T   |
| T. lupinaster              | CTAACCCCTAA | CCC        | ----- | ---- | AGAACC     | -----      | -----      | T   |
| Cicer oxyodon              | CTAACCCCTAA | CCC        | ----- | ---- | AGAACC     | -----      | -----      | T   |
| C. chorrassanicum          | CTAACCCCTAA | CCC        | ----- | ---- | AGAACC     | -----      | -----      | T   |
| C. arietinum               | CTAACCCCTAA | CCC        | ----- | ---- | AGAACC     | -----      | -----      | T   |
| Medicago truncatula_KF     | CTAACCCCTAA | CCC        | ----- | ---- | AGAACC     | -----      | -----      | C   |
| M. truncatula_AC           | CTAACCCCTAA | CCC        | ----- | ---- | AGAACC     | -----      | -----      | C   |
| M. sativa_K                | CTAACCCCTAA | CCC        | ----- | ---- | AGAACC     | -----      | -----      | C   |
| M. sativa                  | CTAACCCCTAA | CCC        | ----- | ---- | AGAACC     | -----      | -----      | C   |
| M. papillosa               | CTAACCCCTAA | CCC        | ----- | ---- | AGAACC     | -----      | -----      | C   |
| M. hybrida                 | CTAACCCCTAA | CCC        | ----- | ---- | AGAACC     | -----      | -----      | C   |
| M. falcata                 | CTAACCCCTAA | CCC        | ----- | ---- | AGAACC     | -----      | -----      | C   |
| M. sativa_KU               | CTAACCCCTAA | CCC        | ----- | ---- | AGAACC     | -----      | -----      | C   |
| Melilotus albus            | CTAACCCCTAA | CCC        | ----- | ---- | AGAACC     | -----      | -----      | T   |
| Hedysarum formosum         | CTAACCCAG-  |            | ----- | ---- | AACC       | -----      | -----      | T   |
| H. varium                  | CTAACCCAG-  |            | ----- | ---- | AACC       | -----      | -----      | T   |
| H. singarense              | CTAACCCAG-  |            | ----- | ---- | AACC       | -----      | -----      | T   |
| H. minjanense              | CTAACCCAG-  |            | ----- | ---- | AACC       | -----      | -----      | T   |
| Tavrniara glabra           | CTAATCCAG-  |            | ----- | ---- | AACC       | -----      | -----      | T   |
| T. diffusa                 | CTAACCCAG-  |            | ----- | ---- | AACC       | -----      | -----      | T   |
| Greuteria membranacea      | CTAACCCAG-  |            | ----- | ---- | AACC       | -----      | -----      | T   |
| Corethroedendron scoparium | CTAACCCAG-  |            | ----- | ---- | AACC       | -----      | -----      | T   |
| Eversmannia subspinosa     | CTAACCCAG-  |            | ----- | ---- | AACC       | -----      | -----      | T   |
| Onobrychis bungei          | CTAACCCCG-  |            | ----- | ---- | AACC       | -----      | -----      | T   |
| O. cornuta                 | CTAACCCAG-  |            | ----- | ---- | AACC       | -----      | -----      | T   |
| O. michauxii               | CTAACCCAG-  |            | ----- | ---- | AACC       | -----      | -----      | T   |
| O. subacaulis              | CTAACCCAG-  |            | ----- | ---- | AACC       | -----      | -----      | T   |
| O. teheranica              | CTAACCCAG-  |            | ----- | ---- | AACC       | -----      | -----      | T   |
| Alhagi maurorum            | CTAATTCAGC  | AG         | ----- | ---- | AACC       | -----      | -----      | T   |
| Caragana microphylla       | CTAACCCAG-  |            | ----- | ---- | AACC       | -----      | -----      | T   |
| C. korshinski              | CTAACCCAG-  |            | ----- | ---- | AACC       | -----      | -----      | T   |
| C. kozlowii                | CTAACCCAG-  |            | ----- | ---- | AACC       | -----      | -----      | T   |
| C. rosea                   | CTAACCCAG-  |            | ----- | ---- | AACC       | -----      | -----      | T   |
| Tibetia liangshanensis     | CTAACCCAG-  |            | ----- | ---- | AACC       | -----      | -----      | T   |
| Gueldenstaedtia verna      | CTAGGCCAA-  |            | ----- | ---- | AACC       | -----      | -----      | T   |
| Halimodendron halodendron  | AAGCGCCGGC  | AG         | ----- | ---- | ATCC       | -----      | -----      | T   |
| Smirnowia turkeстана       | ATAACCCGG-  |            | ----- | ---- | AACC       | -----      | -----      | T   |
| Eremosparton flaccidum     | ATAACCCGG-  |            | ----- | ---- | AACC       | -----      | -----      | T   |
| Colutea persica            | ATAACCCAG-  |            | ----- | ---- | AACC       | -----      | -----      | T   |
| C. triphylla               | ATAACCCAG-  |            | ----- | ---- | AACC       | -----      | -----      | T   |
| Sphaerophysa salsula       | ATAACCCAG-  |            | ----- | ---- | AACC       | -----      | -----      | T   |
| Podlechiella vogelii       | ATAACCCAG-  |            | ----- | ---- | AACC       | -----      | -----      | T   |
| Carmichaelia australis     | ATAACCCAG-  |            | ----- | ---- | AACC       | -----      | -----      | T   |
| Sutherlandia frutescens    | ATAACCCCG-  |            | ----- | ---- | AACC       | -----      | -----      | T   |
| Astragalus membranaceus    | ATAACCCAG-  |            | ----- | ---- | AACC       | -----      | -----      | T   |
| A. mongholicus             | ATAACCCAG-  |            | ----- | ---- | AACC       | -----      | -----      | T   |
| A. nakaianus               | ATAACCCAG-  |            | ----- | ---- | AACC       | -----      | -----      | T   |
| A. macropelmatus           | ATAACCCAG-  |            | ----- | ---- | AACC       | -----      | -----      | T   |
| A. iranicus                | ATAACCCAG-  |            | ----- | ---- | AACC       | -----      | -----      | T   |
| A. denudatus               | ATAACCCAG-  |            | ----- | ---- | AACC       | -----      | -----      | T   |
| A. odoratus                | ATAACCCAG-  |            | ----- | ---- | AACC       | -----      | -----      | T   |
| Oxytropis szovitsii        | ATAACCCAG-  |            | ----- | ---- | AACC       | -----      | -----      | T   |
| O. iranica                 | ATAACCCAG-  |            | ----- | ---- | AACC       | -----      | -----      | T   |
| O. kotschyana              | ATAACCCAG-  |            | ----- | ---- | AACC       | -----      | -----      | T   |
| Erophaca baetica           | ATAAACCCG-  |            | ----- | ---- | AACC       | -----      | -----      | T   |
| Wisteria floribunda        | GTCAAATCGA  | AACTAAAAAA |       |      | GATAGTAGGT | CTAAAAAAGA | AAGTCAGTAT |     |
| W. sinensis                | GTCAAATCGA  | AACTAAAAAA |       |      | GATAGTAGGT | CTAAAAAAGA | AAGTCAGTAT |     |
| Glycyrrhiza lepidota       | GTCAAATAGA  | AACTAAAAAA |       |      | GATAGTAGGT |            |            | AT  |
| G. uralensis               | GTCAAATAGA  | AACTAAAAAA |       |      | GATAGTAGGT |            |            | AT  |
| G. glabra                  | GTCAAATAGA  | AACTAAAAAA |       |      | GATAGTAGGT |            |            | AT  |
| Meristotropis xathioides   | GTCAAATAGA  | AACTAAAAAA |       |      | GATAGTAGGT |            |            | AT  |
| Robinia pseudoacacia       | GTAAAGTAGG  | AAATTCAAAA |       |      | GATGGTAAGT | AT         |            | CTT |
| Lotus japonicus            | GTAAAAAGGA  | AAATAAAAAA |       |      | GAGGGTAGGT | AT         |            | CTT |
| Vicia alpestris            | CCTCCTCAG-  |            | ----- | ---- | AACC       | -----      | -----      | T   |
| V. sativa                  | CTAACCCAG-  |            | ----- | ---- | AACC       | -----      | -----      | T   |
| V. peregrina               | CTAACCCAG-  |            | ----- | ---- | AACC       | -----      | -----      | T   |
| V. sepium                  | CTAACCCAG-  |            | ----- | ---- | AACC       | -----      | -----      | T   |
| V. faba                    | CTAACCCAG-  |            | ----- | ---- | AACC       | -----      | -----      | T   |

|                      |             |           |       |         |            |            |       |
|----------------------|-------------|-----------|-------|---------|------------|------------|-------|
| V.canescens          | CTAACCCAG-  | -----     | ----- | AACC    | -----      | -----      | T     |
| V.monantha           | CTAACCCAG-  | -----     | ----- | AACC    | -----      | -----      | T     |
| V.tetrasperma        | CTAACCCAG-  | -----     | ----- | AACC    | -----      | -----      | T     |
| V.narbonensis        | CTAACCCAG-  | -----     | ----- | AACC    | -----      | -----      | T     |
| Lens culinaris       | CTAACCCAG-  | -----     | ----- | AACC    | -----      | -----      | T     |
| L.orientalis         | GTAACCCAG-  | -----     | ----- | AACC    | -----      | -----      | T     |
| V.ervilia            | CTAACCCAG-  | -----     | ----- | AACC    | -----      | -----      | T     |
| Galega officinalis   | CTAACGCTAA  | CCC-----  | ----- | AGAACC  | -----      | -----      | T     |
| Lathyrus palustris_K | CTAATAATAT  | -----     | ----- | -----   | -----      | -----      | T     |
| L.palustris_H        | CTAATAATTT  | -----     | ----- | -----   | -----      | -----      | T     |
| L.davidii            | CTAACCCCTCT | -----     | ----- | -----   | -----      | -----      | T     |
| L.japonicus          | CTAACTACTA  | -----     | ----- | -----   | -----      | -----      | T     |
| L.ochroleucus        | CTAATACCTA  | -----     | ----- | -----   | -----      | -----      | C     |
| L.littoralis         | CTAACCAATTA | -----     | ----- | -----   | -----      | -----      | T     |
| L.venosus            | CTAACCCTTA  | -----     | ----- | -----   | -----      | -----      | C     |
| L.graminifolius      | CTAATATCTA  | -----     | ----- | -----   | -----      | -----      | T     |
| L.pubescens          | TGAACCAAAA  | -----     | ----- | -----   | -----      | -----      | T     |
| L.sativus_KJ         | CTAACCGAAT  | -----     | ----- | -----   | -----      | -----      | C     |
| L.sativus_HM         | CTAACCGAAT  | -----     | ----- | -----   | -----      | -----      | C     |
| L.pseudocicera       | CTCACCGAAT  | -----     | ----- | -----   | -----      | -----      | C     |
| L.chloranthus        | -----       | -----     | ----- | -----   | -----      | -----      | ----- |
| L.pratensis          | -----       | -----     | ----- | -----   | -----      | -----      | ----- |
| L.odoratus_HM        | -----       | -----     | ----- | -----   | -----      | -----      | ----- |
| L.odoratus_kJ        | -----       | -----     | ----- | -----   | -----      | -----      | ----- |
| L.hirsutus           | -----       | -----     | ----- | -----   | -----      | -----      | ----- |
| L.annuus             | -----       | -----     | ----- | -----   | -----      | -----      | ----- |
| L.cirrhosus          | GTGATCCAAT  | -----     | ----- | -----   | -----      | -----      | A     |
| L.latifolius         | CTGACCCAAT  | -----     | ----- | -----   | -----      | -----      | A     |
| L.tingitanus         | CGAACCCAGA  | -----     | ----- | -----   | -----      | -----      | T     |
| Pisum sativum_H      | CTAACCCAGA  | TAGT----- | ---   | AATGATG | TCCTTGTCCT | TTCTATGAAA | ----- |
| Pisum sativum_K      | CTAACCCAGA  | TAGT----- | ---   | AATGATG | TCCTTGTCCT | TTCTATGAAA | ----- |
| Pisum sativum_HG     | CTAACCCAGA  | TAGT----- | ---   | AATGATG | TCCTTGTCCT | TTCTATGAAA | ----- |
| Pisum fulvum         | CTAACCCAGA  | TAGT----- | ---   | AATGATG | TCCTTGTCCT | TTCTATGAAA | ----- |
| Vavilovia formosa    | TGAACCGAGA  | TAGT----- | ---   | AATGATG | TCCTT----- | -TCTATGAAA | ----- |
| L.clymenum           | -----       | -----     | ----- | -----   | -----      | -----      | ----- |
| L.ochrus             | TTGGAAAAGG  | TCGA----- | ---   | TGTATTG | TTTCCCAAGT | TCCTATGAAA | ----- |

|                                   |            |             |            |            |            |
|-----------------------------------|------------|-------------|------------|------------|------------|
| <i>Trifolium strictum</i>         | AGTAGTGGTG | TCCTTTTATAT | GCAAACCAGA | GAACAGGGGA | CCATTCCCTT |
| <i>T. glanduliferum</i>           | AGTAGTGGTG | TCCTTTTATAT | GCAAACCAGA | GAACAGGGGA | CCATTCCCTT |
| <i>T. boissieri</i>               | AGTAGTGGTG | TCCTTTTATAT | GCAAACCAGA | GAACAGGGGA | CCATTCCCTT |
| <i>T. aureum</i>                  | AGTAGTGGTG | TCCTTTTATAT | GCAAACCAGA | GAACAGGGGA | CCATTCCCTT |
| <i>T. meduseum</i>                | AGTAGTGGTG | TCCTTTTATAT | GCAAACCAGA | GAACAGGGGA | CCATTCCCTT |
| <i>T. subterraneum</i>            | AGTAGTGGTG | TCCTTTTATAT | GCAAACCAGA | GAACAGGGGA | CCATTCCCTT |
| <i>T. pratense</i>                | AGTAGTGGTG | TCCTTTTATAT | ACAAACCAGA | GAACAGGGGA | CCATTCCCTT |
| <i>T. hybridum</i>                | AGTAGTGGTG | TCCTTTTATAT | GCAAACCAGA | GAACAGGGGA | CCATTCCCTT |
| <i>T. semipilosum</i>             | AGTAGTGGTG | TCCTTTTATAT | GCAAACCAGA | GAACAGGGGA | CCATTCCCTT |
| <i>T. occidentale</i>             | AGTAGTGGTG | TCCTTTTATAT | GCAAACCAGA | GAACAGGGGA | CCATTCCCTT |
| <i>T. repens</i>                  | AGTAGTGGTG | TCCTTTTATAT | GCAAACCAGA | GAACAGGGGA | CCATTCCCTT |
| <i>T. lupinaster</i>              | AGTAGTGGTG | TCCTTTTATAT | GCAAACCAGA | GAACAGGGGA | CCATTCCCTT |
| <i>Cicer oxyodon</i>              | AGTAGCGGTG | TCCTTTTATAT | GCAAACCAGA | GAACAAGGGA | CCATTCCCTT |
| <i>C. chorrassanicum</i>          | AGTAGCGGTG | TCCTTTTATAT | GCAAACCAGA | GAACAAGGGA | CCATTCCCTT |
| <i>C. arietinum</i>               | AGTAGCGGTG | TCCTTTTATAT | GCAAACCAGA | GAACAAGGGA | CCATTCCCTT |
| <i>Medicago truncatula_KF</i>     | AGTAGTGGTG | TCCTTTTATAT | GCAAACACGA | GAACAAGGGA | CCATTCCCTT |
| <i>M. truncatula_AC</i>           | AGTAGTGGTG | TCCTTTTATAT | GCAAACACGA | GAACAAGGGA | CCATTCCCTT |
| <i>M. sativa_K</i>                | AGTAGTGGTG | TCCTTTTATAT | GCAAACAAGA | GAACAAGGGA | CCATTCCCTT |
| <i>M. sativa</i>                  | AGTAGTGGTG | TCCTTTTATAT | GCAAACAAGA | GAACAAGGGA | CCATTCCCTT |
| <i>M. papillosa</i>               | AGTAGTGGTG | TCCTTTTATAT | GCAAACAAGA | GAACAAGGGA | CCATTCCCTT |
| <i>M. hybrida</i>                 | AGTAGTGGTG | TCCTTTTATAT | GCAAACAAGA | GAACAAGGGA | CCATTCCCTT |
| <i>M. falcata</i>                 | AGTAGTGGTG | TCCTTTTATAT | GCAAACAAGA | GAACAAGGGA | CCATTCCCTT |
| <i>M. sativa_KU</i>               | AGTAGTGGTG | TCCTTTTATAT | GCAAACAAGA | GAACAAGGGA | CCATTCCCTT |
| <i>Melilotus albus</i>            | AGTAGTGGTG | TCCTTTTATAT | GCAAACCAGA | GAACAAGGGA | CCATTCCCTT |
| <i>Hedysarum formosum</i>         | CGTACGGGTG | TCCTTTTATAT | GTACACCAGA | GAACAGGGGG | CCATCCCCTT |
| <i>H. varium</i>                  | CGTACGGGTG | TCCTTTTATAT | GTACACCAGA | GAACAGGGGG | CCATTCCCTT |
| <i>H. singarense</i>              | CGTATGGGTG | TCCTGTATAT  | GTACACCAGA | GAACAGGGGG | CCATTCCCTT |
| <i>H. minjanense</i>              | CGTACGGGTG | TCCTTTTATAT | GTACACCAGA | GAACAGGGGG | CCATTCCCTT |
| <i>Tavrneria glabra</i>           | CGTACGGGTG | TCCTTTTATAT | GTACACCAGA | GAACAGGGGG | CCATTCCCTT |
| <i>T. diffusa</i>                 | CGTACGGGTG | TCCTTTTATAT | GTACACCAGA | GAACAGGGGG | CCATTCCCTT |
| <i>Greuteria membranacea</i>      | CGTACGGGTG | TCCTTTTATAT | GTACACCAGA | GAACAGGGGG | CCATTCCCTT |
| <i>Corethroedendron scoparium</i> | CGTACGGGTG | TCCTTTTATAT | GTACACCAGA | GAACAGGGGG | CCATTCCCTT |
| <i>Eversmannia subspinosa</i>     | CGTACGGGTG | TCCTTTTATAT | GTACACCAGA | GAACAGGGGG | CCATTCCCTT |
| <i>Onobrychis bungei</i>          | CGTAAGGGTG | TCCTTTTATAT | GTACACCAGA | GAACAGGGGG | CCATTCCCTT |
| <i>O. cornuta</i>                 | CGTAAAGGTG | TCCTTTTATAT | GTACACCAGA | GAACAGGGGG | CCATTCCCTT |
| <i>O. michauxii</i>               | CGTACGGGTG | TCCTTTTATAT | GTACACTAGA | GAACAGGGGG | CCATTCCCTT |
| <i>O. subacaulis</i>              | CGTACGGGTG | TCCTTTTATAT | GTACACTAGA | GAACAGGGGG | CCATTCCCTT |
| <i>O. teheranica</i>              | CGTACGGGTG | TCCTTTTATAT | GTACACTAGA | GAACAGGGGG | CCATTCCCTT |
| <i>Alhagi maurorum</i>            | CATGCGGGTG | TCCTTTTATAT | GTACACCAGA | GAACAGGGGG | CCATTCCCTT |
| <i>Caragana microphylla</i>       | CGTACTGGTG | TCCTTTTATAT | GTACACCAGA | GAACAGGGGG | CCATTCCCTT |
| <i>C. korshinski</i>              | CGTACTGGTG | TCCTTTTATAT | GTACACCAGA | GAACAGGGGG | CCATTCCCTT |
| <i>C. kozlowii</i>                | CGTACTGGTG | TCCTTTTATAT | GTACACCAGA | GAACAGGGGG | CCATTCCCTT |
| <i>C. rosea</i>                   | CGTACTGGTG | TCCTTTTATAT | GTATACCAGA | GAACAGGGGG | CCATTCCATT |
| <i>Tibetia liangshanensis</i>     | CGTACTGGTG | TCCTTTTATAT | GTATACCAGA | GAACAGGGGG | CCATTCCCTT |
| <i>Gueldenstaedtia verna</i>      | CGAACGGGGG | CCCTTTATGT  | GTACACCAGA | AAACAGGGGG | CCGTTCCCTT |
| <i>Halimodendron halodendron</i>  | TGTAGTGTG  | TCCATGAGAC  | CTCCACCAGA | CAGCGGGGG  | CCACTCCCTT |
| <i>Smirnowia turkestanica</i>     | TTTAGTGGTG | TCCTTTTATAT | GCACACCAGA | GAACAGGGGG | ACATTCCCTT |
| <i>Eremosparton flaccidum</i>     | CGTAGTGGTG | TCCTTTTATAT | GCACACCAGA | GAACAGGGGG | ACATTCCCTT |
| <i>Colutea persica</i>            | TTTAGTGGTG | TCCTTTTATAT | GCACACCAGA | GAACAGGGGG | ACATTCCCTT |
| <i>C. triphylla</i>               | TTTAGTGGGG | TCCTTTTATAT | GCACACCAGA | GAACAGGGGG | ACATTCCCTT |
| <i>Sphaerophylla salsula</i>      | TGTAGTGGGG | TCCTTTTATAT | GCACACCAGA | GAACAAGGGG | ACATTCCCTT |
| <i>Podlechiella vogelii</i>       | TTTAGTGGTG | TCCTTTTATAT | GCACACCAGA | GAACAGGGGG | ACATTCCCTT |
| <i>Carmichaelia australis</i>     | CTTAGTGGTG | TCCTTTTATAT | GCACACCAGA | GAACAGGGGG | ACATTCCCTT |
| <i>Sutherlandia frutescens</i>    | CGTAGTGGTG | TCCTTTTATAT | GCACACCAGA | GAACAGGGGG | ACATTCCCTT |
| <i>Astragalus membranaceus</i>    | CTTAGTGGTG | TCCTTTTATAT | GCACACCAGA | GAACAGGGGG | ACATTCCCTT |
| <i>A. mongholicus</i>             | CTTAGTGGTG | TCCTTTTATAT | GCACACCAGA | GAACAGGGGG | ACATTCCCTT |
| <i>A. nakaianus</i>               | TTTAGTGGTG | TCCTTTTATAT | GCACACCAGA | GAACAGGGGG | ACATTCCCTT |
| <i>A. macropelmatus</i>           | CTTAGTGGTG | TCCTTTTATAT | GCACACCAGA | GAACAGGGGG | ACATTCCCTT |
| <i>A. iranicus</i>                | CTTAGTGGTG | TCCTTTTATAT | GCACACCAGA | GAACAGGGGG | ACATTCCCTT |
| <i>A. denudatus</i>               | CTTAGTGGTG | TCCTTTTATAT | GCACACCAGA | GAACAGGGGG | ACATTCCCTT |
| <i>A. odoratus</i>                | CTTAGTGGTG | TCCTTTTATAT | GCACACCAGA | GAACAGGGGG | ACATTCCCTT |
| <i>Oxytropis szovitsii</i>        | CGTAGTGGCG | TCCTTTTATAT | GCACACCAGA | GAACAGGGGG | ACATTCCCTT |
| <i>O. iranica</i>                 | CGTAGTGGTG | TCCTTTTATAT | GCACACCAGA | GAACAGGGGG | ACATTCCCTT |
| <i>O. kotschyana</i>              | CGTAGTGGTG | TCCTTTTATAT | GCACACCAGA | GAACAGGGGG | ACATTCCCTT |
| <i>Erophaca baetica</i>           | TTTAGTGGTA | TCCTTTTATAT | GCACACCCGA | GAACAGGGGG | ACATTCCCTT |
| <i>Wisteria floribunda</i>        | CGTAGTGGTG | TCCTTTTATAT | GCAAACCAGA | GAACAGGGGG | CCATCCCCCT |
| <i>W. sinensis</i>                | CGTAGTGGTG | TCCTTTTATAT | GCAAACCAGA | GAACAGGGGG | CCATCCCCCT |
| <i>Glycyrrhiza lepidota</i>       | CGTAATGGTG | TCCTTTTATAT | GCAAACCAGA | GAACAGGGAG | CCATTCCCTT |
| <i>G. uralensis</i>               | CGTAATGGTG | TCCTTTTATAT | GCAAACCAGA | GAACAGGGAG | CCATTCCCTT |
| <i>G. glabra</i>                  | CGTAATGGTG | TCCTTTTATAT | GCAAACCAGA | GAACAGGGAG | CCATTCCCTT |
| <i>Meristotropis xathioides</i>   | CGTAATGGTG | TCCTTTTATAT | GCAAACCAGA | GAACAGGGGG | CCATTCCCTT |
| <i>Robinia pseudoacacia</i>       | CGTGGTGGTG | TCCTTTTATAT | TCAAACTCGA | GAACAGGGGG | CCTTTGCCTT |
| <i>Lotus japonicus</i>            | CGCAGTGGTG | TCCTTTTATAT | GCAAACCAGA | GAACAGGGGG | CCATTCCCCT |
| <i>Vicia alpestris</i>            | CATCACTGTG | TCCTTTTATAA | GCAAACCACA | GAACAAGGGA | CCATTCCCTT |
| <i>V. sativa</i>                  | AGTAGTGGTG | TCCTTTTATAT | GCAAACCAGA | GAACAGGGGA | CCATTCCCTT |
| <i>V. peregrina</i>               | AGTAGTGGTG | TCCTTTTATAT | GCAAACCAGA | GAACAGGGGA | CCATTCCCTT |
| <i>V. sepium</i>                  | AGTAGTGGTG | TCCTTTTATAT | GCAAACCAGA | GAACAGGGGA | CCATTCCCTT |
| <i>V. faba</i>                    | AGTAGTGGTG | TCCTTTTATAT | GCAAACCAGA | GAACAGGGGA | CCATTCCCTT |

|                      |            |             |             |            |             |
|----------------------|------------|-------------|-------------|------------|-------------|
| V.canescens          | AGTAGTGGTG | TCCTTTATAT  | GCAAACCAGA  | GAACAGGGGA | CCATTCCCTT  |
| V.monantha           | AGTAGTGGTG | TCCTTTATAT  | GCAAACCAGA  | GAACAGGGGA | CCATTCCCTT  |
| V.tetrasperma        | AGTAGTGGTG | TCCTTTATAT  | GCAAACCAGA  | GAACAGGGGA | CCATTCCCTT  |
| V.narbonensis        | AGTAGTGGTG | TCCTTTATAT  | GCAAACCATA  | GAACAGGGGA | CCATTCCCTT  |
| Lens culinaris       | AGTAGTGGTG | TTCTTTATAT  | GCAAACCAGA  | GAACAGGGGA | CCATTCCCTT  |
| L.orientalis         | TGTAGTGGTG | TTCTTTATAT  | GCAAACCAGA  | GAACAGGGGA | CCATTCCCTT  |
| V.ervilia            | AGTAGTGGTG | TCCTTTATAT  | GCAAACCAGA  | GAACAGGGGA | CCATTCCCTT  |
| Galega officinalis   | AGTAGTGGTG | TCCTTTATAT  | GCAAACCAGA  | GAACAGGGGA | CCATTCCCTT  |
| Lathyrus palustris_K | TGGGGTGATG | TGTTTATATTT | AAAAACCCGC  | GAACAGGAGA | CCTTGGCCTT  |
| L.palustris_H        | TGTGGTGATG | TCTTGTATTTT | AAAAACCCGC  | GAACAGGAGA | CCTTGGCCTT  |
| L.davidii            | TGGGGTGATG | TTTTTACTTT  | AAAATTTAAAT | ACCGGCCAAC | AGGTGGCCTT  |
| L.japonicus          | TGGGGTGATG | TGCTGTATTT  | ACAAACTGTC  | GAACAGGAAA | CCTTGAACCTT |
| L.ochroleucus        | TGGGGGGATG | TTTTGTATTTT | ACAAACCTTC  | GAACAGAAGA | CCATTACATTT |
| L.littoralis         | TGGGGTGATG | TGCTGTATTTT | ACAAACCATC  | GAACAGGAAA | CCTTGAACCTT |
| L.venosus            | TGGGGGGATG | TGATGTATTTT | ACAAACCATC  | AAACAGGGGA | CCTTTACCTTT |
| L.graminifolius      | TGGGGGGATG | TGCTGCATTTT | AAAAACGAGA  | GATCACAAGA | C'TTCCCTTT  |
| L.pubescens          | TGGGGTGATG | TGCTTTATCT  | GGAAACCAGA  | GAACAGGGGA | CCTTGACCTT  |
| L.sativus_KJ         | TGGGGTGATG | TCCTTTATAT  | TGAAACCAGA  | AAACACGGGA | CCTTGCCGAT  |
| L.sativus_HM         | TGGGGTGATG | TCCTTTATAT  | TGAAACCAGA  | AAACACGGGA | CCTTGCCGAT  |
| L.pseudocicera       | TGGGGTGATG | TCCTTTATAT  | TGAAACCAGA  | AAACACGGGA | CCTTGCCGAT  |
| L.chloranthus        | -----      | -----       | -----       | -----      | -----       |
| L.pratensis          | -----      | -----       | -----       | -----      | -----       |
| L.odoratus_HM        | -----      | -----       | -----       | -----      | -----       |
| L.odoratus_kJ        | -----      | -----       | -----       | -----      | -----       |
| L.hirsutus           | -----      | -----       | -----       | -----      | -----       |
| L.annuus             | -----      | -----       | -----       | -----      | -----       |
| L.cirrhosus          | TTTGGTGATG | TCCTTTATAT  | TCAAACCAGA  | GAACAGGGGA | TCTTGGCGGT  |
| L.latifolius         | TTTGGTGATG | TCCTTTATAT  | TCAAACCAGA  | GAACAGGGGA | TCTTGGCGGT  |
| L.tingitanus         | TGTGGTGATG | TCCTTTATAT  | GAAAACCAGA  | GAACAGGGGA | CCGTGCCCTT  |
| Pisum sativum_H      | ACCAGAGAAA | -----       | -----GA     | GAAAAGGGGA | CCATTCCCTT  |
| Pisum sativum_K      | ACCAGAGAAA | -----       | -----GA     | GAAAAGGGGA | CCATTCCCTT  |
| Pisum sativum_HG     | ACCAGAGAAA | -----       | -----GA     | GAAAAGGGGA | CCATTCCCTT  |
| Pisum fulvum         | ACCAGAGAAA | -----       | -----GA     | GAAAAGGGGA | CCATTCCCTT  |
| Vavilovia formosa    | ACCAGAGAAA | AGGGGACCAT  | GAAAACCAGA  | GAAAAGGGGA | CCATTCCCTT  |
| L.clymenum           | -----      | -----       | -----       | -----      | -----       |
| L.ochrus             | GAGATTAAGT | GCCTCATACT  | AAAAACTGAC  | CCAGATCGTC | ATGATGTCCT  |

|                                   |            |            |            |            |            |
|-----------------------------------|------------|------------|------------|------------|------------|
| <i>Trifolium strictum</i>         | GACTCCTGTT | GATGATTATT | ATGATAGGAC | TCCACGC--- | AACGTTATAC |
| <i>T. glanduliferum</i>           | GACTCCTGTT | GATGATTATT | ATGATAGGAC | TCCACGC--- | AACGTTATAC |
| <i>T. boissieri</i>               | GACTCCTGTT | GATGATTATT | ATGATAGGAC | TCCGCGC--- | AACGTTATAC |
| <i>T. aureum</i>                  | GACTCCTGTT | GATGATTATT | ATGATAGGAC | TCCACGC--- | AACGTTATAC |
| <i>T. meduseum</i>                | GACTCCTGTT | GATAATTATT | ATGATAGGAC | TCCACAC--- | AACGTTATAC |
| <i>T. subterraneum</i>            | GACTCCTGTT | GATAATTATT | ATGATAGGAC | TCCACAC--- | AACGTTATAC |
| <i>T. pratense</i>                | GACTCCTGTT | GATAATTATT | ATGATAGGAC | TCCACGC--- | AACGTTATAC |
| <i>T. hybridum</i>                | GACTCCTGTT | GATGATTATT | ATGATAGGAC | TCCGCGC--- | AACGTTATAC |
| <i>T. semipilosum</i>             | GACTCCTGTT | GATGATTATT | ATGATAGGAC | TCCGCGC--- | AACGTTATAC |
| <i>T. occidentale</i>             | GACTCCTGTT | GATGATTATT | ATGATAGGAC | TCCGCGC--- | AACGTTATAC |
| <i>T. repens</i>                  | GACTCCTGTT | GATGATTATT | ATGATAGGAC | TCCGCGC--- | AACGTTATAC |
| <i>T. lupinaster</i>              | GACTCCTGTT | GATGATTATT | ATGATAGGAC | TCCACGC--- | AATGTTATAC |
| <i>Cicer oxyodon</i>              | GACTCCTGTT | GATGATTATT | ATGATAGGAC | TCCACGC--- | AACGTTATAC |
| <i>C. chorrassanicum</i>          | GACTGCTGTT | GATGATTATT | ATGATAGGAC | TCCACGC--- | AACGTTATAC |
| <i>C. arietinum</i>               | GACTCCTGGT | GATGATTATT | ATGATAGGAC | TCCACGC--- | AACGTTATAC |
| <i>Medicago truncatula_KF</i>     | GACTCCTGTT | GATGATTATT | ATGATAGGAC | TCCACGC--- | AACGTTATAC |
| <i>M. truncatula_AC</i>           | GACTCCTGTT | GATGATTATT | ATGATAGGAC | TCCACGC--- | AACGTTATAC |
| <i>M. sativa_K</i>                | GACTCCTGTT | GATGATTATT | ATGATAGGAC | TCCACGC--- | AACGTTATAC |
| <i>M. sativa</i>                  | GACTCCTGTT | GATGATTATT | ATGATAGGAC | TCCACGC--- | AACGTTATAC |
| <i>M. papillosa</i>               | GACTCCTGTT | GATGATTATT | ATGATAGGAC | TCCACGC--- | AACGTTATAC |
| <i>M. hybrida</i>                 | GACTCCTGTT | GATGATTATT | ATGATAGGAC | TCCACGC--- | AACGTTATAC |
| <i>M. falcata</i>                 | GACTCCTGTT | GATGATTATT | ATGATAGGAC | TCCACGC--- | AACGTTATAC |
| <i>M. sativa_KU</i>               | GACTCCTGTT | GATGATTATT | ATGATAGGAC | TCCACGC--- | AACGTTATAC |
| <i>Melilotus albus</i>            | GACTCCTGTT | GATGATTATT | ATGATAGGAC | TCCCGCG--- | AACGTTATAC |
| <i>Hedysarum formosum</i>         | GACTCCTGCT | GATGATTATT | ATGAGAGGAC | TCCACGCGCC | AGCGTTTTCG |
| <i>H. varium</i>                  | GACTCCTGCT | GATGATTATT | ATGCGAGGAC | TCCACGCGCC | AGCGTTTTCG |
| <i>H. singarense</i>              | GACTCCTGCT | GATGATTA-- | -TGAGAGGAC | TCCACGCGCC | AGCGTTTTCG |
| <i>H. minjanense</i>              | GACTCCTGTT | GATGATTATT | ATGAGAGGAC | TCCACGCGCC | AGCGTTTTCG |
| <i>Tavrneria glabra</i>           | GACTCCTGTT | GATGATTATT | ATGACAGGAC | TCCACGCGCC | AGCGTTTTTG |
| <i>T. diffusa</i>                 | GACTCCTGTT | GATGATTATT | ATGACAGCAC | TCCACGCGCC | AGCGTTTTTG |
| <i>Greuteria membranacea</i>      | GACTCCTCTT | GATGATTATT | ATGAGAGGAC | TCCACGCACC | AGCGTTTTCG |
| <i>Corethroedendron scoparium</i> | GACTCCTCTT | GATGATTATT | ATGAGAGGAC | TCCACGCACC | AGCGTTTTCG |
| <i>Eversmannia subspinosa</i>     | GACTCCTCTT | GATGATTATT | ATGAGAGGGC | TCCACGCACC | AGCGTTTTCG |
| <i>Onobrychis bungei</i>          | GACCCCTCTT | GATGATTATT | ATGAGAGGAC | TCCACGCACC | AGCGTTTTTG |
| <i>O. cornuta</i>                 | GACTCCTCTT | GATGATTATT | ATGAGAGGAC | TCCACGCACC | AGCGTTTTCG |
| <i>O. michauxii</i>               | GACTCCTCTT | GATGATTATT | ATGAGATGAC | TCCACGCACC | AGCGTTTTTG |
| <i>O. subacaulis</i>              | GACTCCTCTT | GATGATTATT | ATGAGATGAC | TCCACGCACC | AGCGTTTTTG |
| <i>O. teheranica</i>              | GACTCCTCTT | GATGATTATT | ATGAGATGAC | TCCACGCACC | AGCGTTTTTG |
| <i>Alhagi maurorum</i>            | GACTCCTGTT | GATTATTATT | ATGATAAGAC | TCCACGCGCC | AGCGTTTTCC |
| <i>Caragana microphylla</i>       | GACTCCTGTT | GATGTTTATT | ATGATAGGAC | TCCGCGCGCC | AGCGTTTTCG |
| <i>C. korshinski</i>              | GACTCCTGTT | GATGTTTATT | ATGATAGGAC | TCCGCGCGCC | AGCGTTTTCG |
| <i>C. kozlowii</i>                | GACTCCTGTT | GATGTTTATT | ATGATAGGAC | TCCGCGCGCC | AGCGTTTTCG |
| <i>C. rosea</i>                   | GACTCCTGTT | GATGTTTATT | ATGATAGGAC | TCCGCGCGCC | AGCGTTTTCG |
| <i>Tibetia liangshanensis</i>     | GACTCCTCTT | GATGATTATT | ATGATAGGAC | TCCACGCGCC | AGCGTTTTCC |
| <i>Gueldenstaedtia verna</i>      | GACCCC---  | -----      | -----      | -----      | -----      |
| <i>Halimodendron halodendron</i>  | TACTCCTGTT | GATGTTTATT | ATAATAGGAC | TCCGCGCTCC | AGCGTTTTAC |
| <i>Smirnowia turkestanica</i>     | GACTCCTGTT | GATGATTATT | ATGATAGGAC | TCCCGCG--- | AACATTTTAC |
| <i>Eremosparton flaccidum</i>     | GACTCCTGTT | GATGATTATT | ATGATAGGAC | TCCACGC--- | AACATTTTAC |
| <i>Colutea persica</i>            | GACTCCTGTT | GATGATTATT | ATGATAGGAC | TCCCGCG--- | AACATTTTAC |
| <i>C. triphylla</i>               | GACTCCTGGT | GATGATTATT | ATGATAGGAC | TCCCGCG--- | AACATTTTAC |
| <i>Sphaerophylla salsula</i>      | GACTCCTGTT | GAAGATTATT | TTGATAGGAC | TCCCGCG--- | AACATTTTAC |
| <i>Podlechiella vogelii</i>       | GACTCCTGTT | GATGATTATT | ATGATAGGAC | TCCGCGC--- | AACATTTTAC |
| <i>Carmichaelia australis</i>     | GACTCCTGTT | GATGATTATT | ATGATAGGAC | TCCGCGC--- | AACATTTTAC |
| <i>Sutherlandia frutescens</i>    | GACTCCTGTT | GATGATTATT | ATGATAGGGC | TCCGCGC--- | AACATTTTAC |
| <i>Astragalus membranaceus</i>    | GACTCCTGTT | GATGATTATT | ATGATAGGAC | TCCACGG--- | AACATTTTAC |
| <i>A. mongholicus</i>             | GACTCCTGTT | GATGATTATT | ATGATAGGAC | TCCACGG--- | AACATTTTAC |
| <i>A. nakaianus</i>               | GACTCCTGTT | GATGATTATT | ATGATAGGAC | TCCCGCG--- | AACATTTTAC |
| <i>A. macropelmatus</i>           | GACCCTTGTT | GATGATTATT | ATGATAGGAC | TCCACGG--- | AACATTTTAC |
| <i>A. iranicus</i>                | GACTCCTGTT | GATGATTATT | ATGATAGGAC | TCCACGG--- | AACATTTTAC |
| <i>A. denudatus</i>               | GACTCCTGTT | GATGATTATT | ATGATAGGAC | TCCACGG--- | AACATTTTAC |
| <i>A. odoratus</i>                | GACTCCTGTT | GATGATTTTT | ATGATAGGAC | TCCACGG--- | AACATTTTAC |
| <i>Oxytropis szovitsii</i>        | GACTCCTGTT | GATGATTATT | ATGATAGGAC | TCCGCGC--- | AACATTTTAC |
| <i>O. iranica</i>                 | GACTCCTGTT | GATGATTATT | ATGATAGGAC | TCCGCGC--- | AACATTTTAC |
| <i>O. kotschyana</i>              | GACTCCTGTT | GATGATTATT | ATGATAGGAC | TCCGCGC--- | AACATTTTAC |
| <i>Erophaca baetica</i>           | GACTCCTGTT | GATGATTATT | ATGATAGGAC | TCCCGCG--- | AACATTTTGC |
| <i>Wisteria floribunda</i>        | GACTCCTATT | GATGATTATT | ---ATAGGAC | TTCAGCC--- | AAAGTTATAC |
| <i>W. sinensis</i>                | GACTCCTATT | GATGATTATT | ---ATAGGAC | TTCAGCC--- | AAAGTTATAC |
| <i>Glycyrrhiza lepidota</i>       | GACTCCTATT | GATGATTATT | ---ATAGGAC | TCCACGC--- | AAAGTTGCAC |
| <i>G. uralensis</i>               | GACTCCTATT | GATGATTATT | ---ATAGGAC | TCCACGC--- | AAAGTTGCAC |
| <i>G. glabra</i>                  | GACTCCTATT | GATGATTATT | ---ATAGGAC | TCCACGC--- | AAAGTTGCAC |
| <i>Meristotropis xathioides</i>   | GACTCCTATT | GATGATTATT | ---ATAGGAC | TCCACGC--- | AAAGTTGCAC |
| <i>Robinia pseudoacacia</i>       | GACTCCTATT | GACGATTATT | -----GGGA  | TCCATTC--- | AAAGTTGCAC |
| <i>Lotus japonicus</i>            | AACTGCTGTT | GACGATTCTT | -----GGAA  | TCCACCA--- | AAAATTGCAC |
| <i>Vicia alpestris</i>            | GACTCCTCTC | GATGAT---- | -----AGGTC | TTCTCGC--- | AACGTTATAC |
| <i>V. sativa</i>                  | GACTCCTGTT | GATGAT---- | -----AGGAC | TCCCGCG--- | AACGTTATAC |
| <i>V. peregrina</i>               | GACTCCTGTT | GATGAT---- | -----AGGAC | TCCCGCG--- | AACGTTATAC |
| <i>V. sepium</i>                  | GACTCCTGTT | GATGAT---- | -----AGGAC | TCCCGCG--- | AACGTTATAC |
| <i>V. faba</i>                    | GACTCCTGTT | GATGAT---- | -----AGGAC | TCCATGC--- | AACGTTATAC |

|                      |            |            |            |            |            |
|----------------------|------------|------------|------------|------------|------------|
| V.canescens          | GACTCCTGTT | GATGAT---- | -----AGGAC | TCCACGC--- | AACGTTATAC |
| V.monantha           | GACTCCTGTT | GATGAT---- | -----AGGAC | TCCACGC--- | AACGTTATAC |
| V.tetrasperma        | GACTCCTGTT | GATGAT---- | -----AGGAC | TCCACGC--- | AACGTTATAC |
| V.narbonensis        | GACTCCTGTT | GATGAT---- | -----AGGAC | TCCACGC--- | AACGTTATAC |
| Lens culinaris       | GACTCCTGTT | GATGAT---- | -----AGGAC | TCTACGC--- | AACGTTATAC |
| L.orientalis         | GGCTCCCGTT | GATGAT---- | -----AGGGC | TCTACGC--- | AACGTTATAC |
| V.ervilia            | GAGTCCTGTT | GATGAT---- | -----AGGAC | TCCACGC--- | AACGTTATAC |
| Galega officinalis   | GACTCCTGTT | GATGAGTATT | ATGATAGGAC | TCCGCGT--- | AACGTTATCC |
| Lathyrus palustris_K | AAC---GCCT | ATTAAT---- | --GGGACTTG | T---TAC--- | AATCTTAGAG |
| L.palustris_H        | AAC---TCCT | ATTAAT---- | --GGGAGTTG | T---TAC--- | AATCTTAGAG |
| L.davidii            | AAC---ACCT | AGTAAT---- | --GGTAGCTG | T---TAC--- | ACTCTTAGAG |
| L.japonicus          | AAC---GCCT | ATTAAT---- | --GGAAGTTG | T---TAC--- | AATCTTAGAG |
| L.ochroleucus        | AAC---GCCT | ATTAAT---- | --GGGAGTTG | T---TAC--- | AATCTTAGAG |
| L.littoralis         | AAC---GCCT | ATTAAT---- | --GGGAGTTG | T---TAC--- | AATCTTAGAG |
| L.venosus            | AAC---ACCT | ATTAAT---- | --GGGACTTG | T---TAC--- | AATCTTAGAG |
| L.graminifolius      | AAC---GCCT | ATTAAT---- | --GGGAGTTG | T---TAC--- | AATCTTAGAG |
| L.pubescens          | AAC---GCCT | CCTCAT---- | --GCTAGTTG | T---TAC--- | AATCTTAGAG |
| L.sativus_KJ         | GAC---TCCT | ACTAAA---- | --GATGGTCG | TAGATAT--- | ATGCTTGCAA |
| L.sativus_HM         | GAC---TCCT | ACTAAA---- | --GATGGTCG | TAGATAT--- | ATGCTTGCAA |
| L.pseudocicera       | GAC---TCCT | ACTAAA---- | --GATGGTCG | TAGATAC--- | AGGCTTACAA |
| L.chloranthus        | -----      | -----      | -----      | -----      | ACCCTTATGG |
| L.pratensis          | -----      | -----      | -----      | -----      | ACCCTTATGG |
| L.odoratus_HM        | -----      | -----      | -----      | -----      | ACCCTTATGG |
| L.odoratus_kJ        | -----      | -----      | -----      | -----      | ACCCTTATGG |
| L.hirsutus           | -----      | -----      | -----      | -----      | ACCCTTATGG |
| L.annuus             | -----      | -----      | -----      | -----      | ACCCTTATGG |
| L.cirrhosus          | TACACCGCCT | AATAAT---- | --AATGGTCG | TATATAC--- | ACCCTTATGG |
| L.latifolius         | TACACCTCCT | AATAAT---- | --AATGGTCG | TATATAC--- | ACCCTTATGG |
| L.tingitanus         | GAC---TCCT | GTTAAT---- | --ACTCGTCG | TACATAC--- | AACCTTATGG |
| Pisum sativum_H      | GAGTTCTATT | AATGCT---- | -----AGTCC | TCCACGC--- | AACCGTCTAA |
| Pisum sativum_K      | GAGTTCTATT | AATGCT---- | -----AGTCC | TCCACGC--- | AACCGTCTAA |
| Pisum sativum_HG     | GAGTTCTGTT | AATGCT---- | -----AGTCC | TCCACGC--- | AACCGTCTAA |
| Pisum fulvum         | GAGTTCTGTT | AATGCT---- | -----AGTCC | TCCACGC--- | AACCGTCTAA |
| Vavilovia formosa    | GAGTTCTCTT | AATGCT---- | -----AGTCC | TCCACGC--- | AACGTGCTAA |
| L.clymenum           | -----      | -----      | -----      | -----      | -----      |
| L.ochrus             | TTATATGAAA | ACCAGA---- | -----AAACA | GGGGACC--- | TTGCCCTTGA |



|                                   |             |            |            |            |            |
|-----------------------------------|-------------|------------|------------|------------|------------|
| <i>Trifolium strictum</i>         | AAAAAGCTTG  | GGACTTGTCC | AGATTCTTGA | GTGTACCAAT | GGAAATCGTT |
| <i>T. glanduliferum</i>           | AAAAAGCTTG  | GGACTTGTCC | AGATTCTTGA | GTGTACCAAT | GGAAATCGTT |
| <i>T. boissieri</i>               | AAAAAGCTTG  | GGACTTGTCC | AGATTCTTGA | GTGTACCAAT | GGAAATCGTT |
| <i>T. aureum</i>                  | AAAAAGCTTG  | GGACTTGTCC | AGATTCTTGA | GTGTACCAAT | GGAAATCGTT |
| <i>T.meduseum</i>                 | AAAAAGCTTG  | GGACTTGTCC | AGATTCTTGA | GTATACCAAT | GGAAATCGTT |
| <i>T.subterraneum</i>             | AAAAAGCTTG  | GGACTTGTCC | AGATTCTTGA | GTATACCAAT | GGAAATCGTT |
| <i>T.pratense</i>                 | AAAAAGCTTG  | GGACTTGTCC | AGATTCTTGA | GTATACCAAT | GGAAATCGTC |
| <i>T.hybridum</i>                 | AAAAAGCTTG  | GGACTTATCC | AGATTCTTGA | GTGTACCAAT | GGAAATCGTT |
| <i>T.semipilosum</i>              | AAAAAGCTTG  | GGACTTGTCC | AGATTCTTGA | GTGTACCAAT | GGAAATCGTT |
| <i>T.occidentale</i>              | AAAAAGCTTG  | GGACTTGTCC | AGATTCTTGA | GTGTACCAAT | GGAAATCGTT |
| <i>T.repens</i>                   | AAAAAGCTTG  | GGACTTGTCC | AGATTCTTGA | GTGTACCAAT | GGAAATCGTT |
| <i>T.lupinaster</i>               | AAAAAGCTTG  | GGACTTGTCC | AGATTCTTGA | GTGTACCAAT | GGAAATCGTT |
| <i>Cicer oxyodon</i>              | AAAAAGCTTG  | GGACTTGTCC | AGATTCTTGA | GTGTTCCAAT | GGAAATAGTT |
| <i>C. chorrassanicum</i>          | AAAAAGCTTG  | GGACTTGCC  | AGATTCTTGA | GTGTTCCAAT | GGAAATAGTC |
| <i>C. arietinum</i>               | AAAAAGCTTG  | GGACTTGTCC | AGATTCTTGA | GTGTACCAAT | GGAAATAGTT |
| <i>Medicago truncatula_KF</i>     | AAAAAGCTTG  | GGACTTGTCC | AGATTCTTGA | GTGTACCAAT | GGAAATCGTT |
| <i>M.truncatula_AC</i>            | AAAAAGCTTG  | GGACTTGTCC | AGATTCTTGA | GTGTACCAAT | GGAAATCGTT |
| <i>M.sativa_K</i>                 | AAAAAGCTTG  | GGACTTGTCC | AGATTCTTGT | GTGTACCAAT | GGAAATCGTT |
| <i>M.sativa</i>                   | AAAAAGCTTG  | GGACTTGTCC | AGATTCTTGT | GTGTACCAAT | GGAAATCGTT |
| <i>M.papillosa</i>                | AAAAAGCTTG  | GGACTTGTCC | AGATTCTTGT | GTGTACCAAT | GGAAATCGTT |
| <i>M.hybrida</i>                  | AAAAAGCTTG  | GGACTTGTCC | AGATTCTTGT | GTGTACCAAT | GGAAATCGTT |
| <i>M.falcata</i>                  | AAAAAGCTTG  | GGACTTGTCC | AGATTCTTGT | GTGTACCAAT | GGAAATCGTT |
| <i>M.sativa_KU</i>                | AAAAAGCTTG  | GGACTTGTCC | AGATTCTTGT | GTGTACCAAT | GGAAATCGTT |
| <i>Melilotus albus</i>            | AAAAAGCTTG  | GGACTTGTCC | AGATTCTTGA | GTGTACCAAT | GGAAATCGTT |
| <i>Hedysarum formosum</i>         | AAACAGCTTC  | GGACTTGGCT | GCATTCTTGG | ATGTACAATT | GGAAATAATT |
| <i>H.varium</i>                   | AAACAGCTTC  | GGACTTGGCC | GCATTCTTGG | ATGTACAATT | GGAAATAATT |
| <i>H.singarense</i>               | AAACAGCTTC  | GGACTTGGCC | GCATTCTTGG | ATGTACAATT | GGAAATAATT |
| <i>H.minjanense</i>               | AAACAGCTTC  | GGACTTGGCC | GCATTCTTGG | ATGTACAATT | GGAAATAATT |
| <i>Tavniera glabra</i>            | AAACAGCTTC  | GGACTTGGCC | GCATTCTTGG | ATGTACAATT | GGAAATAATT |
| <i>T.diffusa</i>                  | AAACAGCTTC  | GGACTTGGCC | GCATTCTTGG | ATGTACAATT | GGAAATAATT |
| <i>Greuteria membranacea</i>      | AAACAGCTTC  | GGACTTGGCC | GCATTCTTGG | ATGTACAATT | GGAAATAATT |
| <i>Corethroedendron scoparium</i> | AAACAGCTTC  | GGACTTGGCC | GCATTCTTGG | ATGTACAATT | GGAAATAATT |
| <i>Eversmannia subspinosa</i>     | AAACAGCTTC  | GGACTTGGCC | GCATTCTTGG | ATGTACAATT | GGAAATAATT |
| <i>Onobrychis bungei</i>          | AAACAGCTTC  | GGACTTGGCC | GCATTCTTGG | ATGTACAATT | GGAAATAATT |
| <i>O.cornuta</i>                  | AAACAGCTTC  | GGACTTGGCC | GCATTCTTGG | ATGTACAATT | GGAAATAATT |
| <i>O.michauxii</i>                | AAACAGCTTC  | GGACTTGGCC | GCATTCTTGG | ATGTACAATT | GGAAATAATT |
| <i>O.subacaulis</i>               | AAACAGCTTC  | GGACTTGGCC | GCATTCTTGG | ATGTACAATT | GGAAATAATT |
| <i>O.teheranica</i>               | AAACAGCTTC  | GGACTTGGCC | GCATTCTTGG | ATGTACCATT | GGAAATAATT |
| <i>Alhagi maurorum</i>            | AAACAGCTTC  | GGACTTGGCC | GCATTCTTGG | ATGTACCATT | GGAAATAATT |
| <i>Caragana microphylla</i>       | AAACAGCTTC  | GGACTTGGCC | GCATTCTTGG | ATGTACCATT | GGAAATAATT |
| <i>C.korshinski</i>               | AAACAGCTTC  | GGACTTGGCC | GCATTCTTGG | ATGTACCATT | GGAAATAATT |
| <i>C.kozlowii</i>                 | AAACAGCTTC  | GGACTTGGCC | GCATTCTTGG | ATGTACCATT | GGAAATAATT |
| <i>C.rosea</i>                    | AAACAGCTTC  | GGACTTGGCC | GCATTCTTGG | ATGTACCATT | GGAAATAATT |
| <i>Tibetia liangshanensis</i>     | AAACAGCTTC  | GGACTTGGCC | GCATTCTTGG | ATGTACCATT | GGAAATAATT |
| <i>Gueldenstaedtia verna</i>      | -----       | -----      | -----      | -----      | -----      |
| <i>Halimodendron halodendron</i>  | AAACAGCTTC  | GGACTTGGCC | GCATTCTTGG | ATGTACCGTC | GGAAATAATT |
| <i>Smirnowia turkestanica</i>     | AAACAGCTTC  | GGACTTGTCC | GCATTCTTGG | ATGTACCGTT | GGAAATAATT |
| <i>Eremosparton flaccidum</i>     | AAACAGCTTC  | GGACTTGTCC | GCATTCTTGG | ACGTACCGTT | GGAAATAATT |
| <i>Colutea persica</i>            | AAACAGCTTC  | GGACTTGTCC | GCATTTTTGG | ATGTACCCTT | GGAAATAATT |
| <i>C. triphylla</i>               | AAACAGCTTC  | GGACTTGTCC | GCATTTTTGG | ATGTACCCTT | GGAAATAATT |
| <i>Sphaerophysa salsula</i>       | AAACAACCTTG | GGACTTGTCC | GCATTTTTGG | ATGTACCCTT | TGAAATAATT |
| <i>Podlechiella vogelii</i>       | AAACAGCTTC  | GGACTTGTCC | GCATTCTTGG | ATGTACCATT | GGAAATAATT |
| <i>Carmichaelia australis</i>     | AAACAGCTTC  | GGACTTGTCC | GCATTCTTGG | ATGTACCATT | AGAAATAATT |
| <i>Sutherlandia frutescens</i>    | AAACAGCTTC  | GGACTTGTCT | GCATTCTTGG | ATGTACCATT | GGAAATAATT |
| <i>Astragalus membranaceus</i>    | AAACAGCTTC  | GGACTTGTCC | GCATTCTTGG | ATGTACCATT | GGAAATAATT |
| <i>A.mongholicus</i>              | AAACAGCTTC  | GGACTTGTCC | GCATTCTTGG | ATGTACCATT | GGAAATAATT |
| <i>A.nakaianus</i>                | AAACAGCTTC  | GGACTTGTCC | GCATTTTTGG | ATGTACCCTT | GGAAATAATT |
| <i>A.macropelmatus</i>            | AAACAGCTTC  | GGACTTGTCC | GCATTCTTGG | ATGTACCATT | GGAAATAATT |
| <i>A.iranicus</i>                 | AAACAGCTTC  | GGACTTATCC | GCATTCTTGG | ATGTACCATT | GGAAATAATT |
| <i>A.denudatus</i>                | AAACAGCTTC  | GGACTTGTCC | GCATTCTTGG | ATGTACCATT | GGAAATAATT |
| <i>A.odoratus</i>                 | AAACAGCTTC  | GGACTTGTCC | GCATTCTTGG | ATGTACCATT | GGAAATAATT |
| <i>Oxytropis szovitsii</i>        | AAACAGCTTC  | GGACTTGTCC | GCATTCTTGG | ATGTACCATT | GGAAATAATT |
| <i>O.iranica</i>                  | AAACAGCTTC  | GGACTTGTCC | GCATTCTTGG | ATGTACCATT | GGAAATAATT |
| <i>O.kotschyana</i>               | AAACAGCTTC  | GGACTTGTCC | GCATTCTTGG | ATGTACCATT | GGAAATAATT |
| <i>Erophaca baetica</i>           | AAACAGCTTC  | GGACTTGTCT | GCATTCTTGG | AAGTACCCTT | GGAAATTTAT |
| <i>Wisteria floribunda</i>        | AAAAAGCCTG  | GGACTTGTCC | ATATTCTTGC | GTGTACCAAT | GGAAATATTT |
| <i>W. sinensis</i>                | AAAAAGCCTG  | GGACTTGTCC | ATATTCTTGC | GTGTACCAAT | GGAAATATTT |
| <i>Glycyrrhiza lepidota</i>       | AAAAAGCTTG  | GGACTTGTCC | ATATTCTTGC | GTGTACCAAT | GGAAAT---T |
| <i>G.uralensis</i>                | AAAAAGCTTG  | GGACTTGTCC | ATATTCTTGC | GTGTACCAAT | GGAAAT---T |
| <i>G.glabra</i>                   | AAAAAGCTTG  | GGACTTGTCC | ATATTCTTGC | GTGTACCAAT | GGAAAT---T |
| <i>Meristotropis xathioides</i>   | AAAAAGCTTG  | GGACTTGTCC | ATATTCTTGC | GTGTACCAAT | GGAAAT---T |
| <i>Robinia pseudoacacia</i>       | AAAAAGCTGG  | AGAAATGTGT | AGGTTCTTGC | GTGTCCCAAT | TGAAATATTT |
| <i>Lotus japonicus</i>            | AAAAAGCTGG  | AGATTTGTCC | AAGTTATTGC | GTGTGCCAAT | TGAAATATTT |
| <i>Vicia alpestris</i>            | AAAAAGCTTG  | GGACTTGTCC | AGATTCATGA | GTGTACCAAT | GGAAATCGTT |
| <i>V.sativa</i>                   | AAAAAGCTTG  | GGACTTGTCC | AGATTCATGA | GTGTACCAAT | GGAAATCGTT |
| <i>V.peregrina</i>                | AAAAAGCTTG  | GGACTTGTCC | AGATTCATGA | GTGTACCAAT | GGAAATCGTT |
| <i>V.sepium</i>                   | AAAAAGCTTG  | GGACTTGTCC | AGATTCATGA | GTGTACCAAT | GGAAATCGTT |
| <i>V. faba</i>                    | AAAAAGCTTG  | GGACTTGTCC | AGATTCATGA | GTGTACCAAT | GGAAATCGTT |

|                      |            |            |            |             |             |
|----------------------|------------|------------|------------|-------------|-------------|
| V.canescens          | AAAAAGCTTG | GGACTTGTCC | AGATTCTTGA | GTGTACCAAT  | GGAAATCGTT  |
| V.monantha           | AAAAAGCTTG | GGACTTGTCC | AGATTCTTGA | GTGTACCAAT  | GGTAATCGTT  |
| V.tetrasperma        | AAAAAGCTTG | GGACTTGTCC | AGATTCTTGA | GTGTACCAAT  | GGAAATCGTT  |
| V.narbonensis        | AAAAAGCTTG | GGACTTGTCC | AGATTCTTGA | GTGTACCAAT  | GGAAATCGTT  |
| Lens culinaris       | AAAAAGCTTG | GGACTTGTCC | AGATTCTTGA | GTGTACCAAT  | GGAAATCGTT  |
| L.orientalis         | AAAAAGCTTG | GGACTTGTCC | AGATTCTTGA | GTGTACCAAT  | GGAAATCGTT  |
| V.ervilia            | AAAAAGCTTG | GGACTTGTCC | AGATTCTTGA | GTGTACCAAT  | GGAAATCGTT  |
| Galega officinalis   | AAAAAGCTTG | GGACTTGTCC | AGATTCTTGA | GTGTACCGAT  | GGAAATCGTT  |
| Lathyrus palustris_K | AAAAGGGGGC | GGAGTTGTCC | CGATTCTTGA | GTGTACCCTAT | AAAAATTATT  |
| L.palustris_H        | AAAAGGGGGT | GGAGTTGTCC | CGATTCTTGA | GTGTACCCTT  | AAAAATTATT  |
| L.davidii            | AAAAGGGGGA | GAAGTTGTCC | CGATTCTTGA | GTGTACCCTT  | TAAAAATTATT |
| L.japonicus          | AAAAGGGGGC | GGAGTTGTCC | CGATTCTTGA | GTGTACCCTT  | AAAAATTATT  |
| L.ochroleucus        | AAAAGGGGGC | GGAGTTGTCC | CGATTCTTGA | GTGTACCCTT  | AAAAATTATT  |
| L.littoralis         | AAAAGGGGGC | GGAGTTGTCC | CGATTCTTGA | GTGTACCCTT  | AAAAATTATT  |
| L.venosus            | AAAAGGGGGC | GGAGTTGTCC | CGATTCTTGA | GTGTACCCTT  | AAAAATTATT  |
| L.graminifolius      | AAAAGGGGGC | GGAGTTGTCC | CGATTCTTGA | ATGTACCCTT  | AAAAATTATT  |
| L.pubescens          | AAAAGGGTAC | GAAGTTGTCC | CGATTCTTGA | GTCTACCCTT  | CAAGATTGTT  |
| L.sativus_KJ         | AACATGGTTT | GGAGTTGTCC | AGATTCTTGA | ATATACCCTT  | GGACATTATT  |
| L.sativus_HM         | AACATGGTTT | GGAGTTGTCC | AGATTCTTGA | ATATACCCTT  | GGACATTATT  |
| L.pseudocicera       | AACATGGTTT | GGAGTTGTCC | AAATTCTTGA | ATATACCCTT  | GGAAATTAGT  |
| L.chloranthus        | AACATGGTGC | TGAATTGTCC | AGATTCTTGA | ATCTACCCTT  | CCAAGTCCTT  |
| L.pratensis          | AACATGGTGC | TGAATTGTCC | AGATTCTTGA | ATCTACCCTT  | CCAAGTCCTT  |
| L.odoratus_HM        | AACATGGTGC | TGAATTGTCC | AGATTCTTGA | ATCTACCCTT  | CCAAGTCCTT  |
| L.odoratus_kJ        | AACATGGTGC | TGAATTGTCC | AGATTCTTGA | ATCTACCCTT  | CCAAGTCCTT  |
| L.hirsutus           | AACATGGTGC | TGAATTGTCC | AGATTCTTGA | ATCTACCCTT  | CCAAGTACTT  |
| L.annuus             | AACATGGTGC | TGAATTGTCC | GGATTCTTGA | ATCTATCACT  | CCAAGTCCTT  |
| L.cirrhusus          | AACATGGTGC | TGAATTGTCC | AGATTCTTGA | ATATACCCTT  | CCAAGTCCTT  |
| L.latifolius         | AACATGGTGC | TGAATTGTCC | AGATTCTTGA | ATATACCCTT  | CCAAGTCCTT  |
| L.tingitanus         | AAAAGGGTGT | GGAGTTGTCC | AGATTCTTGA | ATATACCCTT  | CGAAATTGTT  |
| Pisum sativum_H      | AAAAA-GTGT | GGAGTTGCC  | AGATTATTGA | -----       | -----       |
| Pisum sativum_K      | AAAAA-GTGT | GGAGTTGCC  | AGATTATTGA | -----       | -----       |
| Pisum sativum_HG     | AAAAA-GTGT | GGAGTTGCC  | AGATTATTGA | -----       | -----       |
| Pisum fulvum         | AAAAA-GTGT | GGAGTTGCC  | AGATTATTGA | -----       | -----       |
| Vavilovia formosa    | AAAAAAGTGT | GGAGTTGCC  | AGATTATTGA | -----       | -----       |
| L.clymenum           | -----      | -----      | -----      | -----       | -----       |
| L.ochrus             | CTCCTGTTAA | GGATAGTCCT | GTATGCAACC | TTAGGCAAAA  | TGGTGTGGAG  |

|                            |            |       |       |       |       |       |
|----------------------------|------------|-------|-------|-------|-------|-------|
| Trifolium strictum         | CCATATTCTT | GA    | ----- | ----- | ----- | ----- |
| T. glanduliferum           | CCATATTCTT | GA    | ----- | ----- | ----- | ----- |
| T. boissieri               | CCATATTCTT | GA    | ----- | ----- | ----- | ----- |
| T. aureum                  | CCATATTCTT | GA    | ----- | ----- | ----- | ----- |
| T. meduseum                | CCGTATTCTT | GA    | ----- | ----- | ----- | ----- |
| T. subterraneum            | CCGTATTCTT | GA    | ----- | ----- | ----- | ----- |
| T. pratense                | CCATATTCTT | GA    | ----- | ----- | ----- | ----- |
| T. hybridum                | CCATATTCTT | GA    | ----- | ----- | ----- | ----- |
| T. semipilosum             | CCATATTCTT | GA    | ----- | ----- | ----- | ----- |
| T. occidentale             | CCATATTCTT | GA    | ----- | ----- | ----- | ----- |
| T. repens                  | CCATATTCTT | GA    | ----- | ----- | ----- | ----- |
| T. lupinaster              | CCATATTCTT | GA    | ----- | ----- | ----- | ----- |
| Cicer oxyodon              | CCATATTCTT | GA    | ----- | ----- | ----- | ----- |
| C. chorrassanicum          | CCATATTCTT | GA    | ----- | ----- | ----- | ----- |
| C. arietinum               | CCGTATTCTT | GA    | ----- | ----- | ----- | ----- |
| Medicago truncatula_KF     | CCATATTCTT | GA    | ----- | ----- | ----- | ----- |
| M. truncatula_AC           | CCATATTCTT | GA    | ----- | ----- | ----- | ----- |
| M. sativa_K                | CCATATTCTT | GA    | ----- | ----- | ----- | ----- |
| M. sativa                  | CCATATTCTT | GA    | ----- | ----- | ----- | ----- |
| M. papillosa               | CCATATTCTT | GA    | ----- | ----- | ----- | ----- |
| M. hybrida                 | CCATATTCTT | GA    | ----- | ----- | ----- | ----- |
| M. falcata                 | CCATATTCTT | GA    | ----- | ----- | ----- | ----- |
| M. sativa_KU               | CCATATTCTT | GA    | ----- | ----- | ----- | ----- |
| Melilotus albus            | CCATATTCTT | GA    | ----- | ----- | ----- | ----- |
| Hedysarum formosum         | GTATAA     | ----  | ----- | ----- | ----- | ----- |
| H. varium                  | GTATAA     | ----  | ----- | ----- | ----- | ----- |
| H. singarense              | GTATAA     | ----  | ----- | ----- | ----- | ----- |
| H. minjanense              | GTATAA     | ----  | ----- | ----- | ----- | ----- |
| Tavniera glabra            | GTATAA     | ----  | ----- | ----- | ----- | ----- |
| T. diffusa                 | GTATAA     | ----  | ----- | ----- | ----- | ----- |
| Greuteria membranacea      | GTATAA     | ----  | ----- | ----- | ----- | ----- |
| Corethroedendron scoparium | GTATAA     | ----  | ----- | ----- | ----- | ----- |
| Eversmannia subspinosa     | GTATAA     | ----  | ----- | ----- | ----- | ----- |
| Onobrychis bungei          | GTATAA     | ----  | ----- | ----- | ----- | ----- |
| O. cornuta                 | GTATAA     | ----  | ----- | ----- | ----- | ----- |
| O. michauxii               | GTATAA     | ----  | ----- | ----- | ----- | ----- |
| O. subacaulis              | GTCTAA     | ----  | ----- | ----- | ----- | ----- |
| O. teheranica              | GTATAA     | ----  | ----- | ----- | ----- | ----- |
| Alhagi maurorum            | GTATAA     | ----  | ----- | ----- | ----- | ----- |
| Caragana microphylla       | GTATAA     | ----  | ----- | ----- | ----- | ----- |
| C. korshinski              | GTATAA     | ----  | ----- | ----- | ----- | ----- |
| C. kozlowii                | GTATAA     | ----  | ----- | ----- | ----- | ----- |
| C. rosea                   | GTATAA     | ----  | ----- | ----- | ----- | ----- |
| Tibetia liangshanensis     | GTATAA     | ----  | ----- | ----- | ----- | ----- |
| Gueldenstaedtia verna      | -----      | ----- | ----- | ----- | ----- | ----- |
| Halimodendron halodendron  | GTATAA     | ----  | ----- | ----- | ----- | ----- |
| Smirnowia turkestanica     | GTATAA     | ----  | ----- | ----- | ----- | ----- |
| Eremosparton flaccidum     | GTATAA     | ----  | ----- | ----- | ----- | ----- |
| Colutea persica            | GTATAA     | ----  | ----- | ----- | ----- | ----- |
| C. triphylla               | GTATAA     | ----  | ----- | ----- | ----- | ----- |
| Sphaerophysa salsula       | GTATAA     | ----  | ----- | ----- | ----- | ----- |
| Podlechiella vogelii       | GTATAA     | ----  | ----- | ----- | ----- | ----- |
| Carmichaelia australis     | GTATAA     | ----  | ----- | ----- | ----- | ----- |
| Sutherlandia frutescens    | GTATAA     | ----  | ----- | ----- | ----- | ----- |
| Astragalus membranaceus    | GTATAA     | ----  | ----- | ----- | ----- | ----- |
| A. mongholicus             | GTATAA     | ----  | ----- | ----- | ----- | ----- |
| A. nakaianus               | GTATAA     | ----  | ----- | ----- | ----- | ----- |
| A. macropelmatus           | GTATAA     | ----  | ----- | ----- | ----- | ----- |
| A. iranicus                | GTATAA     | ----  | ----- | ----- | ----- | ----- |
| A. denudatus               | GTATAA     | ----  | ----- | ----- | ----- | ----- |
| A. odoratus                | GTATAA     | ----  | ----- | ----- | ----- | ----- |
| Oxytropis szovitsii        | GTATAA     | ----  | ----- | ----- | ----- | ----- |
| O. iranica                 | GTATAA     | ----  | ----- | ----- | ----- | ----- |
| O. kotschyana              | GTATAA     | ----  | ----- | ----- | ----- | ----- |
| Erophaca baetica           | GTATAA     | ----  | ----- | ----- | ----- | ----- |
| Wisteria floribunda        | TGA        | ----- | ----- | ----- | ----- | ----- |
| W. sinensis                | TGA        | ----- | ----- | ----- | ----- | ----- |
| Glycyrrhiza lepidota       | TGA        | ----- | ----- | ----- | ----- | ----- |
| G. uralensis               | TGA        | ----- | ----- | ----- | ----- | ----- |
| G. glabra                  | TGA        | ----- | ----- | ----- | ----- | ----- |
| Meristotropis xathioides   | TGA        | ----- | ----- | ----- | ----- | ----- |
| Robinia pseudoacacia       | TGA        | ----- | ----- | ----- | ----- | ----- |
| Lotus japonicus            | TGA        | ----- | ----- | ----- | ----- | ----- |
| Vicia alpestris            | CCATATTCTT | GA    | ----- | ----- | ----- | ----- |
| V. sativa                  | CCATATTCTT | GA    | ----- | ----- | ----- | ----- |
| V. peregrina               | CCATATTCTT | GA    | ----- | ----- | ----- | ----- |
| V. sepium                  | CCATATTCTT | GA    | ----- | ----- | ----- | ----- |
| V. faba                    | CCATATTCTT | GA    | ----- | ----- | ----- | ----- |

|                      |            |            |            |            |            |
|----------------------|------------|------------|------------|------------|------------|
| V.canescens          | CCATATTCTT | GA-----    | -----      | -----      | -----      |
| V.monantha           | CCATATTCTT | GA-----    | -----      | -----      | -----      |
| V.tetrasperma        | CCATATTCTT | GA-----    | -----      | -----      | -----      |
| V.narbonensis        | CCATATTCTT | GA-----    | -----      | -----      | -----      |
| Lens culinaris       | CCATATTCGT | GA-----    | -----      | -----      | -----      |
| L.orientalis         | CCAATTCGT  | GA-----    | -----      | -----      | -----      |
| V.ervilia            | CCGGATTCTT | GA-----    | -----      | -----      | -----      |
| Galega officinalis   | CCATATTCTT | GA-----    | -----      | -----      | -----      |
| Lathyrus palustris_K | CAATTCAATT | C----CAAA  | GAATCAAAA- | TAA-----   | -----      |
| L.palustris_H        | CAATTCAATT | C----CAAA  | GAATCAAAA- | TAA-----   | -----      |
| L.davidii            | CACTTCACTT | CAATTGCAAA | GAATCAAAAA | TAA-----   | -----      |
| L.japonicus          | CAATTCAATT | C----CAAA  | GAATCAAAA- | TAA-----   | -----      |
| L.ochroleucus        | CAATTCAATT | C----CAAA  | GAATCAAAA- | TAA-----   | -----      |
| L.littoralis         | CAATTCAATT | C----CAAA  | GAATCAAAA- | TAA-----   | -----      |
| L.venosus            | CAATTCAATT | C----CAAA  | GAATCAAAA- | TAA-----   | -----      |
| L.graminifolius      | CAATTCAATT | C----CAAA  | GAATCAAAA- | TAA-----   | -----      |
| L.pubescens          | CAATCGAATT | C----CGAA  | GAATCCAAA- | TAG-----   | -----      |
| L.sativus_KJ         | TACAAAGAAT | A----CTAA  | -----      | -----      | -----      |
| L.sativus_HM         | TACAAAGAAT | A----CTAA  | -----      | -----      | -----      |
| L.pseudocicera       | TACGAAGAAT | A----CTAA  | -----      | -----      | -----      |
| L.chloranthus        | GAAGAGGTTT | A----CTAC  | GAAGAATAA- | -----      | -----      |
| L.pratensis          | GAAGAGGTTT | A----CTAC  | GAAGAATAA- | -----      | -----      |
| L.odoratus_HM        | GAAGAGGTTT | A----CTAC  | GAAGAATAA- | -----      | -----      |
| L.odoratus_kJ        | GAAGAGGTTT | A----CTAC  | GAAGAATAA- | -----      | -----      |
| L.hirsutus           | GAAGAGGTTT | A----CTAC  | GAAGAATAA- | -----      | -----      |
| L.annuus             | GAAGTGGTTT | A----CTAC  | GAAGAATAA- | -----      | -----      |
| L.cirrhosus          | GAAGAGGTTT | A----CTTC  | GAGGAAGAGG | AAGAATAA-- | -----      |
| L.latifolius         | GAAGAGGTTT | A----CTTC  | GAGGAAGAGG | AAGAATAA-- | -----      |
| L.tingitanus         | CAACCGAATT | A----CGAA  | TAA-----   | -----      | -----      |
| Pisum sativum_H      | -----      | -----      | -----      | -----      | -----      |
| Pisum sativum_K      | -----      | -----      | -----      | -----      | -----      |
| Pisum sativum_HG     | -----      | -----      | -----      | -----      | -----      |
| Pisum fulvum         | -----      | -----      | -----      | -----      | -----      |
| Vavilovia formosa    | -----      | -----      | -----      | -----      | -----      |
| L.clymenum           | -----      | -----      | -----      | -----      | -----      |
| L.ochrus             | TTGTCCAGAT | TCTTGAGTGT | ACGATTAATA | ATTGTTGAAC | CCGAATTACG |

|                            |       |       |       |
|----------------------------|-------|-------|-------|
| Trifolium strictum         | ----- | ----- | ----- |
| T. glanduliferum           | ----- | ----- | ----- |
| T. boissieri               | ----- | ----- | ----- |
| T. aureum                  | ----- | ----- | ----- |
| T. meduseum                | ----- | ----- | ----- |
| T. subterraneum            | ----- | ----- | ----- |
| T. pratense                | ----- | ----- | ----- |
| T. hybridum                | ----- | ----- | ----- |
| T. semipilosum             | ----- | ----- | ----- |
| T. occidentale             | ----- | ----- | ----- |
| T. repens                  | ----- | ----- | ----- |
| T. lupinaster              | ----- | ----- | ----- |
| Cicer oxyodon              | ----- | ----- | ----- |
| C. chorrassanicum          | ----- | ----- | ----- |
| C. arietinum               | ----- | ----- | ----- |
| Medicago truncatula_KF     | ----- | ----- | ----- |
| M. truncatula_AC           | ----- | ----- | ----- |
| M. sativa_K                | ----- | ----- | ----- |
| M. sativa                  | ----- | ----- | ----- |
| M. papillosa               | ----- | ----- | ----- |
| M. hybrida                 | ----- | ----- | ----- |
| M. falcata                 | ----- | ----- | ----- |
| M. sativa_KU               | ----- | ----- | ----- |
| Melilotus albus            | ----- | ----- | ----- |
| Hedysarum formosum         | ----- | ----- | ----- |
| H. varium                  | ----- | ----- | ----- |
| H. singarense              | ----- | ----- | ----- |
| H. minjanense              | ----- | ----- | ----- |
| Tavrneria glabra           | ----- | ----- | ----- |
| T. diffusa                 | ----- | ----- | ----- |
| Greuteria membranacea      | ----- | ----- | ----- |
| Corethroedendron scoparium | ----- | ----- | ----- |
| Eversmannia subspinosa     | ----- | ----- | ----- |
| Onobrychis bungei          | ----- | ----- | ----- |
| O. cornuta                 | ----- | ----- | ----- |
| O. michauxii               | ----- | ----- | ----- |
| O. subacaulis              | ----- | ----- | ----- |
| O. teheranica              | ----- | ----- | ----- |
| Alhagi maurorum            | ----- | ----- | ----- |
| Caragana microphylla       | ----- | ----- | ----- |
| C. korshinski              | ----- | ----- | ----- |
| C. kozlowii                | ----- | ----- | ----- |
| C. rosea                   | ----- | ----- | ----- |
| Tibetia liangshanensis     | ----- | ----- | ----- |
| Gueldenstaedtia verna      | ----- | ----- | ----- |
| Halimodendron halodendron  | ----- | ----- | ----- |
| Smirnowia turkestanica     | ----- | ----- | ----- |
| Eremosparton flaccidum     | ----- | ----- | ----- |
| Colutea persica            | ----- | ----- | ----- |
| C. triphylla               | ----- | ----- | ----- |
| Sphaerophysa salsula       | ----- | ----- | ----- |
| Podlechiella vogelii       | ----- | ----- | ----- |
| Carmichaelia australis     | ----- | ----- | ----- |
| Sutherlandia frutescens    | ----- | ----- | ----- |
| Astragalus membranaceus    | ----- | ----- | ----- |
| A. mongholicus             | ----- | ----- | ----- |
| A. nakaianus               | ----- | ----- | ----- |
| A. macropelmatus           | ----- | ----- | ----- |
| A. iranicus                | ----- | ----- | ----- |
| A. denudatus               | ----- | ----- | ----- |
| A. odoratus                | ----- | ----- | ----- |
| Oxytropis szovitsii        | ----- | ----- | ----- |
| O. iranica                 | ----- | ----- | ----- |
| O. kotschyana              | ----- | ----- | ----- |
| Erophaca baetica           | ----- | ----- | ----- |
| Wisteria floribunda        | ----- | ----- | ----- |
| W. sinensis                | ----- | ----- | ----- |
| Glycyrrhiza lepidota       | ----- | ----- | ----- |
| G. uralensis               | ----- | ----- | ----- |
| G. glabra                  | ----- | ----- | ----- |
| Meristotropis xanthioides  | ----- | ----- | ----- |
| Robinia pseudoacacia       | ----- | ----- | ----- |
| Lotus japonicus            | ----- | ----- | ----- |
| Vicia alpestris            | ----- | ----- | ----- |
| V. sativa                  | ----- | ----- | ----- |
| V. peregrina               | ----- | ----- | ----- |
| V. sepium                  | ----- | ----- | ----- |
| V. faba                    | ----- | ----- | ----- |

|                      |            |            |          |
|----------------------|------------|------------|----------|
| V.canescens          | -----      | -----      | -----    |
| V.monantha           | -----      | -----      | -----    |
| V.tetrasperma        | -----      | -----      | -----    |
| V.narbonensis        | -----      | -----      | -----    |
| Lens culinaris       | -----      | -----      | -----    |
| L.orientalis         | -----      | -----      | -----    |
| V.ervilia            | -----      | -----      | -----    |
| Galega officinalis   | -----      | -----      | -----    |
| Lathyrus palustris_K | -----      | -----      | -----    |
| L.palustris_H        | -----      | -----      | -----    |
| L.davidii            | -----      | -----      | -----    |
| L.japonicus          | -----      | -----      | -----    |
| L.ochroleucus        | -----      | -----      | -----    |
| L.littoralis         | -----      | -----      | -----    |
| L.venosus            | -----      | -----      | -----    |
| L.graminifolius      | -----      | -----      | -----    |
| L.pubescens          | -----      | -----      | -----    |
| L.sativus_KJ         | -----      | -----      | -----    |
| L.sativus_HM         | -----      | -----      | -----    |
| L.pseudocicera       | -----      | -----      | -----    |
| L.chloranthus        | -----      | -----      | -----    |
| L.pratensis          | -----      | -----      | -----    |
| L.odoratus_HM        | -----      | -----      | -----    |
| L.odoratus_kJ        | -----      | -----      | -----    |
| L.hirsutus           | -----      | -----      | -----    |
| L.annuus             | -----      | -----      | -----    |
| L.cirrhosus          | -----      | -----      | -----    |
| L.latifolius         | -----      | -----      | -----    |
| L.tingitanus         | -----      | -----      | -----    |
| Pisum sativum_H      | -----      | -----      | -----    |
| Pisum sativum_K      | -----      | -----      | -----    |
| Pisum sativum_HG     | -----      | -----      | -----    |
| Pisum fulvum         | -----      | -----      | -----    |
| Vavilovia formosa    | -----      | -----      | -----    |
| L.clymenum           | -----      | -----      | -----    |
| L.ochrus             | ACAAATCAAA | AAAGCGAGAA | TAGCATAG |
