# Supplementary material for: Extensive survey of the ycf4 plastid gene throughout the IRLC legumes: Robust evidence of its locus and lineage specific accelerated rate of evolution, pseudogenization and gene loss in the tribe Fabeae
Source: PubMed Central journal article supplement (PMC7058334; doi:10.1371/journal.pone.0229846), 2020-03-05
Supplement: pone.0229846.s003.pdf [file pone.0229846.s003.pdf]

**S1 Table. Taxa included in the *ycf4*, *matK* and *rpl32* analyses.**

| Species                                        | DNA source (location, voucher)                       | GenBank accession no.<br><i>ycf4/matK/rpl32</i> |
|------------------------------------------------|------------------------------------------------------|-------------------------------------------------|
| <b>Fabeae</b>                                  |                                                      |                                                 |
| <i>Lathyrus alamutensis</i> Mozaffarian et al. | Iran: Mozaffarian, Ahvazi & Charkhchian 88388 (TARI) | LC517983/LC518027/-                             |
| <i>L. annuus</i> L.                            | Iran: Hewan 3676 (TARI)                              | LC517984/LC518028/-                             |
| <i>L. armenus</i> (Boiss. &Huet) Celak.        | Turkey: Aytac 8317 (GAZI)                            | LC517985/LC518029/-                             |
| <i>L. boissieri</i> Sirj.                      | Iran: Runemark & Mozaffarian 29308 (TARI)            | LC517986/LC518030/LC518058                      |
| <i>L. brachypterus</i> Celak.                  | Turkey: Aytac & A. Duman 5441 (GAZI)                 | LC517987/LC518031/-                             |
| <i>L. chloranthus</i> Boiss.                   | Iran: Kazempour-Osaloo 2008-5 (TMUH)                 | LC517988/LC518032/-                             |
| <i>L. cirrhosus</i> Ser.                       | GenBank                                              | HM029360 <sup>a</sup> /-/-                      |
| <i>L. clymenum</i> L.                          | GenBank                                              | KJ850235 <sup>b</sup>                           |
| <i>L. cyaneus</i> (Steven) K.Koch.             | Iran: Azerbaijan, Mozaffarian 70010 (TARI)           | LC517989/LC518033/-                             |
| <i>L. davidii</i> Hance                        | GenBank                                              | KJ806192 <sup>b</sup>                           |
| <i>L. digitatus</i> (M. Bieb) Fiori            | Turkey: M. Vural 4033 (GAZI)                         | LC517990/LC518034/-                             |
| <i>L. graminifolius</i> (S.Watson) T.G.White   | GenBank                                              | KJ806193 <sup>b</sup>                           |
| <i>L. hirsutus</i> L.                          | Iran: Naqinezhad 27738 (TUH)                         | LC517991/AB935069 <sup>a</sup> /-               |
| <i>L. japonicus</i> Willd.                     | GenBank                                              | KJ806195 <sup>b</sup>                           |
| <i>L. karsianus</i> Davis                      | Turkey: G. Akgül 1700 (GAZI)                         | LC517992/LC518035/-                             |
| <i>L. latifolius</i> L.                        | GenBank                                              | HM029359 <sup>a</sup> /AF522085 <sup>a</sup> /- |
| <i>L. littoralis</i> (Torr. &A.Gray) Walp.     | GenBank                                              | KJ806196 <sup>b</sup>                           |
| <i>L. ochroleucus</i> Hook.                    | GenBank                                              | KJ806198 <sup>b</sup>                           |
| <i>L. ochrus</i> (L.) DC.                      | Turkey: H. Sagban 3137 (GAZI)                        | LC517993/AB935075 <sup>a</sup> /LC518059        |
| <i>L. odoratus</i> L.                          | GenBank                                              | KJ850237 <sup>b</sup>                           |
| <i>L. odoratus</i> L.                          | GenBank                                              | HM029361 <sup>a</sup> /-/-                      |
| <i>L. palustris</i> L.                         | GenBank                                              | KJ806199 <sup>b</sup>                           |
| <i>L. palustris</i> L.                         | GenBank                                              | HM029362 <sup>a</sup> /-/-                      |
| <i>L. pratensis</i> L.                         | Iran: Heidari et al. 1803 (HWANRC)                   | LC517994/LC518036/-                             |
| <i>L. pseudocicera</i> Pamp.                   | Turkey: N. Adiguzel 2238 (GAZI)                      | LC517995/LC518037/LC518060                      |
| <i>L. pubescens</i> Hook. &Arn.                | GenBank                                              | KJ806200 <sup>b</sup>                           |
| <i>L. sativus</i> L.                           | GenBank                                              | KJ806201 <sup>b</sup>                           |
| <i>L. sativus</i> L.                           | GenBank                                              | HM029371 <sup>b</sup>                           |
| <i>L. tingitanus</i> L.                        | GenBank                                              | KJ850238 <sup>b</sup>                           |
| <i>L. tukhtensis</i> Czeck.                    | Turkey: A. Güner 5798 (GAZI)                         | LC517996/LC518038/LC518061                      |
| <i>L. venosus</i> Willd.                       | GenBank                                              | KJ806202 <sup>b</sup>                           |
| <i>Lens culinaris</i> Medik.                   | GenBank                                              | KF186232 <sup>b</sup>                           |
| <i>L. orientalis</i> (Boiss.) Schmalh.         | Iran: Emadzadeh, Memariani & Zangoeei 36153 (FUMH)   | LC517997/-/LC518062                             |
| <i>Pisumfulvum</i> Sibth& Sm.                  | Turkey: Adiguzel & Aytac 1896 (GAZI)                 | LC518008/LC518039/LC518063                      |
| <i>P. sativum</i> L.                           | GenBank                                              | KJ806203 <sup>b</sup>                           |
| <i>P. sativum</i> L.                           | GenBank                                              | HM029370 <sup>b</sup>                           |
| <i>P. sativum</i> L.                           | GenBank                                              | HG966676 <sup>b</sup>                           |
| <i>Vavilovia formosa</i> (Steven) Al.Fed.      | Iran: Mozaffarian 88389 (TARI)                       | LC518014/LC518042/LC518066                      |
| <i>Vicia alpestris</i> Steven                  | Iran: Alizadeh et al. 8755 (HWANRC)                  | LC518015/LC518043/LC518067                      |
| <i>V. canescens</i> Labill.                    | Iran: Alizadeh et al. 5103 (HWANRC)                  | LC518016/LC518044/LC518068                      |
| <i>V. ervilia</i> (L.) Willd.                  | Iran: Emadzadeh, Memariani & Zangoeei 36169 (FUMH)   | LC518017/LC518045/-                             |
| <i>V. faba</i> L.                              | GenBank                                              | KF042344 <sup>b</sup>                           |
| <i>V. monantha</i> Retz.                       | Iran: Joharchi & Zangoeei 16078 (FUMH)               | LC518018/LC518046/LC518069                      |
| <i>V. narbonensis</i> L.                       | Iran: Alizadeh et al. 8760 (HWANRC)                  | LC518019/LC518047/LC518070                      |

|                                                                                                            |                                                   |                                                       |
|------------------------------------------------------------------------------------------------------------|---------------------------------------------------|-------------------------------------------------------|
| <i>V. peregrina</i> L.                                                                                     | Iran: Wendelbo & Assadi 11971 (TARI)              | LC518020/LC518048/LC518071                            |
| <i>V. sativa</i> L.                                                                                        | GenBank                                           | KJ850242 <sup>b</sup>                                 |
| <i>V. sepium</i> L.                                                                                        | GenBank                                           | MG682352 <sup>b</sup>                                 |
| <i>V. tetrasperma</i> (L.) Schreb.                                                                         | Iran: Pabot 7523 (TARI)                           | LC518021/-/LC518072                                   |
| <b>Trifolieae</b>                                                                                          |                                                   |                                                       |
| <i>Medicago falcata</i> L.                                                                                 | GenBank                                           | KX831887 <sup>b</sup>                                 |
| <i>M. hybrida</i> (Pourr.) Trautv.                                                                         | GenBank                                           | KJ850240 <sup>b</sup>                                 |
| <i>M. papillosa</i> Boiss.                                                                                 | GenBank                                           | KJ850241 <sup>b</sup>                                 |
| <i>M. sativa</i> L.                                                                                        | GenBank                                           | KU321683 <sup>b</sup>                                 |
| <i>M. sativa</i> L.                                                                                        | GenBank                                           | KU321071 <sup>b</sup>                                 |
| <i>M. sativa</i> L.                                                                                        | Iran: Kazempour-Osaloo 2017-1 (TMUH)              | LC517999/-/                                           |
| <i>M. truncatula</i> Gaertn.                                                                               | GenBank                                           | AC093544 <sup>b</sup>                                 |
| <i>M. truncatula</i> Gaertn.                                                                               | GenBank                                           | KF241982 <sup>b</sup>                                 |
| <i>Melilotus albus</i> Medik.                                                                              | GenBank                                           | MH191352 <sup>b</sup>                                 |
| <i>Trifolium aureum</i> Pollich                                                                            | GenBank                                           | KC894708 <sup>b</sup>                                 |
| <i>T. boissieri</i> Guss.                                                                                  | GenBank                                           | KJ788284 <sup>b</sup>                                 |
| <i>T. glanduliferum</i> Boiss.                                                                             | GenBank                                           | KJ788285 <sup>b</sup>                                 |
| <i>T. hybridum</i> L.                                                                                      | GenBank                                           | KJ788286 <sup>b</sup>                                 |
| <i>T. lupinaster</i> L.                                                                                    | GenBank                                           | KJ788287 <sup>b</sup>                                 |
| <i>T. meduseum</i> Blanche ex Boiss.                                                                       | GenBank                                           | KJ476730 <sup>b</sup>                                 |
| <i>T. occidentale</i> Coombe                                                                               | GenBank                                           | KJ788289 <sup>b</sup>                                 |
| <i>T. pratense</i> L.                                                                                      | GenBank                                           | KJ788290 <sup>b</sup>                                 |
| <i>T. repens</i> L.                                                                                        | GenBank                                           | KC894706 <sup>b</sup>                                 |
| <i>T. semipilosum</i> Fresen.                                                                              | GenBank                                           | KJ788291 <sup>b</sup>                                 |
| <i>T. strictum</i> L.                                                                                      | GenBank                                           | KJ788292 <sup>b</sup>                                 |
| <i>T. subterraneum</i> L.                                                                                  | GenBank                                           | EU849487 <sup>b</sup>                                 |
| <i>Trigonella foenum-graecum</i> L.                                                                        | GenBank                                           | MK460508 <sup>b</sup>                                 |
| <b>Galegeae</b>                                                                                            |                                                   |                                                       |
| <i>Galega officinalis</i> L.                                                                               | Georgia: Merello 2443 (MO)                        | LC517975/AB854574 <sup>a</sup> /-                     |
| <b>Cicereae</b>                                                                                            |                                                   |                                                       |
| <i>Cicer arietinum</i> L.                                                                                  | GenBank                                           | EU835853 <sup>b</sup>                                 |
| <i>C. chorassanicum</i> (Bunge) Popov                                                                      | Iran: Rafei & Zangoeei 30566 (FUMH)               | LC517967/AB198879 <sup>a</sup> /-                     |
| <i>C. oxyodon</i> Boiss. & Hohen.                                                                          | Iran: Kazempour-Osaloo 2009 (TMUH)                | LC517968/AB198889 <sup>a</sup> /-                     |
| <b>Hedysareae</b>                                                                                          |                                                   |                                                       |
| <i>Alhagi maurorum</i> Medik.                                                                              | Iran: Kazempour-Osaloo 2008-1 (TMUH)              | LC517962/LC518022/LC518049                            |
| <i>Corethrodedendron scoparium</i> (Fisch. & C.A.Mey.) Fisch. & Basiner                                    | China: Xu et al. 86862 (MSB)                      | LC517971/AB854566 <sup>a</sup> /LC137101 <sup>a</sup> |
| <i>Eversmannia subspinosa</i> (DC.) B. Fedtsch.                                                            | Iran: Freitag & Mozaffarian 28397 (TARI)          | LC517974/AB854573 <sup>a</sup> /LC137102 <sup>a</sup> |
| <i>Greuteria membranacea</i> (Coss. & Bal.) Amirahm. & Kaz. Osaloo (= <i>H. membranaceum</i> Coss. & Bal.) | Morocco: Podlech 49070 (MSB)                      | LC517976/AB854576 <sup>a</sup> /LC137103 <sup>a</sup> |
| <i>Hedysarum formosum</i> Fisch. & C.A.Mey. ex Basin.                                                      | Iran: Ghahreman & Mozaffarian 9778 (TUH)          | LC517979/AB854585 <sup>a</sup> /LC518055              |
| <i>H. minjanense</i> Rech.f.                                                                               | Tajikistan: Dickore 18281 (MSB)                   | LC517980/-/                                           |
| <i>H. singarense</i> Boiss. & Hausskn.                                                                     | Iran: Babakhanlou 19984 (TARI)                    | LC517981/-/LC518056                                   |
| <i>H. varium</i> Willd.                                                                                    | Turkey: Birden 1133 (GAZI)                        | LC517982/-/LC518057                                   |
| <i>Onobrychis aucheri subsp. teheranica</i> (Bornm.) Rech.f.                                               | Iran: Ahangarian & Kazempour-Osaloo 2005-1 (TMUH) | LC518001/AB854602 <sup>a</sup> /LC137148 <sup>a</sup> |
| <i>O. bungei</i> Boiss.                                                                                    | Iran: Rechingner 43484 (MSB)                      | LC518002/-/LC137113 <sup>a</sup>                      |
| <i>O. cornuta</i> (L.) Desv.                                                                               | Iran: Kazempour-Osaloo 2009-1 (TMUH)              | LC518003/JQ669622 <sup>a</sup> /LC137115 <sup>a</sup> |
| <i>O. michauxii</i> DC.                                                                                    | Iran: Assadi 86612 (TARI)                         | LC518004/JQ669628 <sup>a</sup> /LC137129 <sup>a</sup> |
| <i>Taverniera cuneifolia</i> (Roth) Arn.                                                                   | Iran: Basiri & Norouzi 1531 (TUH)                 | LC518012/LC518040/LC518064                            |
| <i>T. diffusa</i> (Cambess.) Thulin                                                                        | Pakistan: Lamond 1405 (MSB)                       | LC518013/LC518041/LC518065                            |
| <b>Caraganeae</b>                                                                                          |                                                   |                                                       |
| <i>Caragana korshinskii</i> Kom.                                                                           | GenBank                                           | KX289923 <sup>b</sup>                                 |
| <i>C. kozlowii</i> Kom.                                                                                    | GenBank                                           | KX349219 <sup>b</sup>                                 |
| <i>C. microphylla</i> Lam.                                                                                 | GenBank                                           | KX289922 <sup>b</sup>                                 |

|                                                            |                                                         |                                                       |
|------------------------------------------------------------|---------------------------------------------------------|-------------------------------------------------------|
| <i>C. rosea</i> Maxim.                                     | GenBank                                                 | MF593790 <sup>b</sup>                                 |
| <i>Gueldenstaedtia verna</i> (Georgi) Boriss.              | USSR: Ulanova & Bassargin 39025(MSB)                    | LC517977/-/-                                          |
| <i>Halimodendron halodendron</i> (Pall.) Voss              | Iran: Maassoumi et al. 86046 (TARI)                     | LC517978/JQ619947 <sup>a</sup> /LC518054              |
| <i>Tibetia liangshanensis</i> P.C.Li                       | GenBank                                                 | MF193597 <sup>b</sup>                                 |
| <b>Coluteae</b>                                            |                                                         |                                                       |
| <i>Carmichaelia australis</i> R.Br.                        | GenBank                                                 | MF597719 <sup>b</sup>                                 |
| <i>Colutea persica</i> Boiss.                              | Iran: Manucheri et al. 277(TARI)                        | LC517969/LC164595 <sup>a</sup> /LC164615 <sup>a</sup> |
| <i>C. triphylla</i> Bunge ex Boiss.                        | Iran: Assadi & Mozaffarian 33325 (TARI)                 | LC517970/LC085323 <sup>a</sup> /LC164617 <sup>a</sup> |
| <i>Eremosparton flaccidum</i> Litw.                        | Turkmanistan: Beljanina et al. 9353 (MSB)               | LC517972/LC164597 <sup>a</sup> /LC164619 <sup>a</sup> |
| <i>Lessertia frutescens</i> (L.) Goldblatt & J.C.Manning   | South Africa: Mummenhoff 851 (TMUH)                     | LC517998/LC164604 <sup>a</sup> /LC164631 <sup>a</sup> |
| <i>Podlechiella vogelii</i> (Webb) Maassoumi & Kaz. Osaloo | Algeria: Podlech 36700 (TARI)                           | LC518009/LC164600 <sup>a</sup> /LC164627 <sup>a</sup> |
| <i>Smirnowia turkestanica</i> Bunge                        | Iran: Maddah & Moradi 3981 (TARI)                       | LC518010/LC164601 <sup>a</sup> /LC164628 <sup>a</sup> |
| <i>Sphaerophysa salsula</i> (Pall.) DC.                    | Iran: Azimi & Talaii 3687 (TMUH)                        | LC518011/LC164603 <sup>a</sup> /LC164630 <sup>a</sup> |
| <b>Wisterieae</b>                                          |                                                         |                                                       |
| <i>Wisteria floribunda</i> (Willd.) DC.                    | GenBank                                                 | KM103376 <sup>b</sup>                                 |
| <i>W. sinensis</i> (Sims) Sweet                            | GenBank                                                 | KT200359 <sup>b</sup>                                 |
| <b>Astragalus/Oxytropis/Erophaca</b>                       |                                                         |                                                       |
| <i>Astragalus denudatus</i> Steven                         | Iran: Kazempour-Osaloo 2016-1 (TMUH)                    | LC517963/LC518023/LC518050                            |
| <i>A. iranicus</i> Bunge                                   | Iran: Kazempour-Osaloo 2016-2 (TMUH)                    | LC517964/LC518024/LC518051                            |
| <i>A. macropelmatus</i> Bunge                              | Iran: Kazempour-Osaloo 2016-3 (TMUH)                    | LC517965/LC518025/LC518052                            |
| <i>A. membranaceus</i> (Fisch.) Bunge                      | GenBank                                                 | KX255662 <sup>b</sup>                                 |
| <i>A. mongholicus</i> Bunge                                | GenBank                                                 | KU666554 <sup>b</sup>                                 |
| <i>A. nakaianus</i> Y.N. Lee                               | GenBank                                                 | KR296789 <sup>b</sup>                                 |
| <i>A. odoratus</i> Lam.                                    | Iran: Kazempour-Osaloo 2016-4 (TMUH)                    | LC517966/LC518026/LC518053                            |
| <i>Erophaca baetica</i> (L.) Boiss.                        | Turkey: Nydeyyer 40164 (MSB)                            | LC517973/JQ619937 <sup>a</sup> /-                     |
| <i>Oxytropis iranica</i> Vassilcz.                         | Iran: Behboudi & Aellen 1948, 5598E (IRAN)              | LC518005/-/-                                          |
| <i>O. kotschyana</i> Boiss. & Hohen.                       | Iran: Shahi Shavvon & Kazempour-Osaloo 2014s50/2 (TMUH) | LC518006/-/-                                          |
| <i>O. szovitsii</i> Boiss. & Buhse                         | Iran: Termeh et al. 33756E (IRAN)                       | LC518007/-/LC164624 <sup>a</sup>                      |
| <b>Glycyrrhiza/Meristotropis</b>                           |                                                         |                                                       |
| <i>Glycyrrhiza glabra</i> L.                               | GenBank                                                 | KF201590 <sup>b</sup>                                 |
| <i>G. lepidota</i> Pursh                                   | GenBank                                                 | KY038482 <sup>b</sup>                                 |
| <i>G. uralensis</i> Fisch.                                 | GenBank                                                 | KU862308 <sup>b</sup>                                 |
| <i>Meristotropis xanthioides</i> Vassilcz.                 | Iran: Ghahreman et al. 27652 (TUH)                      | LC518000/-/-                                          |
| <b>Outgroups</b>                                           |                                                         |                                                       |
| <i>Robinia pseudoacacia</i> L.                             | GenBank                                                 | KJ468102 <sup>b</sup>                                 |
| <i>Lotus japonicas</i> (Regel) K.Larsen                    | GenBank                                                 | AP002983 <sup>b</sup>                                 |

(-) not available in GenBank

Abbreviations used in plant accession information: FUMH, Ferdowsi University of Mashhad Herbarium, Mashhad, Iran; GAZI, Gazi Universitesi Herbarium, Ankara, Turkey; IRAN, Iranian Research Institute of Plant Protection, Tehran, Iran; MO, Missouri Botanical Garden Herbarium, St Louis, USA; MSB, Herbarium of Ludwig-Maximilians-Universitat, Munchen, Germany; TARI, Herbarium of the Research Institute of Forests and Rangelands, Tehran, Iran; TMUH, Tarbiat Modares University Herbarium, Tehran, Iran; TUH, Tehran University Herbarium, Tehran, Iran; HWANRC, Herbarium of West Azarbayjan Natural Resources Research Center, Urmia, Iran.

<sup>a</sup>Sequences from GenBank

<sup>b</sup>Whole plastid genome
