# Supplementary material for: Extensive survey of the ycf4 plastid gene throughout the IRLC legumes: Robust evidence of its locus and lineage specific accelerated rate of evolution, pseudogenization and gene loss in the tribe Fabeae
Source: PubMed Central journal article supplement (PMC7058334; doi:10.1371/journal.pone.0229846), 2020-03-05
Supplement: pone.0229846.s004.pdf [file pone.0229846.s004.pdf]

**S2 Table. Location and base composition of amplification and sequencing primers used in this study.**

| Primer name     | Primer sequence                  | Location* | Source            |
|-----------------|----------------------------------|-----------|-------------------|
| <i>accD</i> -F  | 5'-AAACAGGCACAGGTCAASTAAATGG-3'  | 842-866   | Magee et al. 2010 |
| <i>CemA</i> -R  | 5'-GACGGAGATACACGATTTAAATAACG-3' | 631-656   | Magee et al. 2010 |
| <i>psaI</i> -F1 | 5'-CCTTCNTTTTTGTKCCTTTAGTR-3'    | 59-82     | Present study     |
| <i>cemA</i> -R1 | 5'-TAAATGTWAAAGAGATGCACCAGG-3'   | 631-656   | Present study     |

\* Location indicates the Start and end nucleotide positions.
