# Supplementary material for: Extensive survey of the ycf4 plastid gene throughout the IRLC legumes: Robust evidence of its locus and lineage specific accelerated rate of evolution, pseudogenization and gene loss in the tribe Fabeae
Source: PubMed Central journal article supplement (PMC7058334; doi:10.1371/journal.pone.0229846), 2020-03-05
Supplement: pone.0229846.s005.pdf [file pone.0229846.s005.pdf]

**S3 Table. Parameter estimation and likelihood ratio tests for the branch-site model.**

| Gene         | Model        | Np  | Ln L         | Estimates of parameters                                                                                                                                      | LRT <i>p</i> -Value | Positive Sites (BEB)                                                                    |
|--------------|--------------|-----|--------------|--------------------------------------------------------------------------------------------------------------------------------------------------------------|---------------------|-----------------------------------------------------------------------------------------|
| <i>ycf4</i>  | Model A      | 115 | -346.334043  | $p0 = 0.0$<br>$p1 = 0.0$<br>$p2a = 0.20401$<br>$p2b = 0.79599$<br>$\omega0 = 0.0$<br>$\omega1 = 1.00000$<br>$\omega2a = 5.36021$<br>$\omega2b = 5.36021$     | 0.031               | 1 L 0.977*, 2 S 0.993**, 3 V 0.999**, 4 V 1.000**, 5 L 0.971*, 6 L 0.997**, 7 T 0.995** |
| <i>ycf4</i>  | Model A Null | 114 | -348.633693  | $p0 = 0.0$<br>$p1 = 1.00000$<br>$p2a = 0.0$<br>$p2b = 0.0$<br>$\omega0 = 0.0$<br>$\omega1 = 1.00000$<br>$\omega2a = 1.00000$<br>$\omega2b = 1.00000$         |                     | Not Allowed                                                                             |
| <i>matK</i>  | Model A      | 69  | -7469.753525 | $p0 = 0.69266$<br>$p1 = 0.30734$<br>$p2a = 0.0$<br>$p2b = 0.0$<br>$\omega0 = 0.12324$<br>$\omega1 = 1.00000$<br>$\omega2a = 1.00000$<br>$\omega2b = 1.00000$ | 0.994               | Not Allowed                                                                             |
| <i>matK</i>  | Model A Null | 68  | -7469.753548 | $p0 = 0.69266$<br>$p1 = 0.30734$<br>$p2a = 0.0$<br>$p2b = 0.0$<br>$\omega0 = 0.12324$<br>$\omega1 = 1.00000$<br>$\omega2a = 1.00000$<br>$\omega2b = 1.00000$ |                     | Not Allowed                                                                             |
| <i>rpl32</i> | Model A      | 162 | -1384.373553 | $p0 = 0.76461$<br>$p1 = 0.23539$<br>$p2a = 0.0$<br>$p2b = 0.0$<br>$\omega0 = 0.11327$<br>$\omega1 = 1.00000$<br>$\omega2a = 1.00000$<br>$\omega2b = 1.00000$ | 1.00                | Not Allowed                                                                             |
| <i>rpl32</i> | Model A Null | 161 | -1384.373553 | $p0 = 0.76461$<br>$p1 = 0.23539$<br>$p2a = 0.0$<br>$p2b = 0.0$<br>$\omega0 = 0.11327$<br>$\omega1 = 1.00000$<br>$\omega2a = 1.00000$<br>$\omega2b = 1.00000$ |                     | Not Allowed                                                                             |
